# Supplementary material
Source: ML conference proceedings conference paper supplement (https://proceedings.mlr.press/v139/araki21a.html)
Supplement: Supplementary file 1 [file araki21a-supp.zip]

Archive with 429 entries (321 files):
- supp/appendix.pdf
- supp/delivery domain code/
- supp/delivery domain code/lof/
- supp/delivery domain code/lof/.gitignore
- supp/delivery domain code/lof/environment.yml
- supp/delivery domain code/lof/README.md
- supp/delivery domain code/lof/simulator/
- supp/delivery domain code/lof/simulator/__init__.py
- supp/delivery domain code/lof/simulator/delivery.py
- supp/delivery domain code/lof/simulator/environment.py
- supp/delivery domain code/lof/simulator/gridworld.py
- supp/delivery domain code/lof/simulator/object.py
- supp/delivery domain code/lof/simulator/options.py
- supp/delivery domain code/lof/simulator/proposition.py
- supp/delivery domain code/lof/simulator/README.MD
- supp/delivery domain code/lof/simulator/rendering.py
- supp/delivery domain code/lof/simulator/reward_machines.py
- supp/delivery domain code/lof/simulator/simulator.py
- supp/delivery domain code/lof/tests/
- supp/delivery domain code/lof/tests/composability_delivery.py
- supp/delivery domain code/lof/tests/load_and_plot_results_composability.py
- supp/delivery domain code/lof/tests/load_and_plot_results_satisfaction.py
- supp/delivery domain code/lof/tests/satisfaction_delivery.py
- supp/delivery domain code/lof/tests/specs.py
- supp/delivery domain code/lof/tests/test_qlearning_flat_options.py
- supp/delivery domain code/lof/tests/test_qlearning_greedy.py
- supp/delivery domain code/lof/tests/test_qlearning_lof_ql.py
- supp/delivery domain code/lof/tests/test_qlearning_lof_vi.py
- supp/delivery domain code/lof/tests/test_qlearning_rm.py
- supp/delivery domain code/logical options framework.zip
- supp/icml video.mp4
- supp/pick-and-place domain code/
- supp/pick-and-place domain code/lof/
- supp/pick-and-place domain code/lof/.gitignore
- supp/pick-and-place domain code/lof/.gitmodules
- supp/pick-and-place domain code/lof/env.yml
- supp/pick-and-place domain code/lof/libs/
- supp/pick-and-place domain code/lof/libs/PyRep/
- supp/pick-and-place domain code/lof/libs/qrm/
- supp/pick-and-place domain code/lof/libs/qrm/__init__.py
- supp/pick-and-place domain code/lof/libs/qrm/README.md
- supp/pick-and-place domain code/lof/libs/qrm/rm/
- supp/pick-and-place domain code/lof/libs/qrm/rm/tasks/
- supp/pick-and-place domain code/lof/libs/qrm/rm/tasks/composite.txt
- supp/pick-and-place domain code/lof/libs/qrm/rm/tasks/if.txt
- supp/pick-and-place domain code/lof/libs/qrm/rm/tasks/or.txt
- supp/pick-and-place domain code/lof/libs/qrm/rm/tasks/sequential.txt
- supp/pick-and-place domain code/lof/libs/qrm/scripts/
- supp/pick-and-place domain code/lof/libs/qrm/scripts/craft.sh
- supp/pick-and-place domain code/lof/libs/qrm/scripts/office.sh
- supp/pick-and-place domain code/lof/libs/qrm/scripts/water.sh
- supp/pick-and-place domain code/lof/libs/qrm/src/
- supp/pick-and-place domain code/lof/libs/qrm/src/__init__.py
- supp/pick-and-place domain code/lof/libs/qrm/src/baselines/
- supp/pick-and-place domain code/lof/libs/qrm/src/baselines/__init__.py
- supp/pick-and-place domain code/lof/libs/qrm/src/baselines/dqn.py
- supp/pick-and-place domain code/lof/libs/qrm/src/baselines/feature_proxy.py
- supp/pick-and-place domain code/lof/libs/qrm/src/baselines/hrl.py
- supp/pick-and-place domain code/lof/libs/qrm/src/baselines/policy_bank.py
- supp/pick-and-place domain code/lof/libs/qrm/src/baselines/replay_buffer.py
- supp/pick-and-place domain code/lof/libs/qrm/src/baselines/run_dqn.py
- supp/pick-and-place domain code/lof/libs/qrm/src/baselines/run_hrl.py
- supp/pick-and-place domain code/lof/libs/qrm/src/common/
- supp/pick-and-place domain code/lof/libs/qrm/src/common/__init__.py
- supp/pick-and-place domain code/lof/libs/qrm/src/common/curriculum.py
- supp/pick-and-place domain code/lof/libs/qrm/src/common/replay_buffer.py
- supp/pick-and-place domain code/lof/libs/qrm/src/common/schedules.py
- supp/pick-and-place domain code/lof/libs/qrm/src/common/segment_tree.py
- supp/pick-and-place domain code/lof/libs/qrm/src/export_summary.py
- supp/pick-and-place domain code/lof/libs/qrm/src/qrm/
- supp/pick-and-place domain code/lof/libs/qrm/src/qrm/__init__.py
- supp/pick-and-place domain code/lof/libs/qrm/src/qrm/dqn_network.py
- supp/pick-and-place domain code/lof/libs/qrm/src/qrm/learning_params.py
- supp/pick-and-place domain code/lof/libs/qrm/src/qrm/policy_bank.py
- supp/pick-and-place domain code/lof/libs/qrm/src/qrm/policy_bank_dqn.py
- supp/pick-and-place domain code/lof/libs/qrm/src/qrm/qrm.py
- supp/pick-and-place domain code/lof/libs/qrm/src/reward_machines/
- supp/pick-and-place domain code/lof/libs/qrm/src/reward_machines/__init__.py
- supp/pick-and-place domain code/lof/libs/qrm/src/reward_machines/reward_functions.py
- supp/pick-and-place domain code/lof/libs/qrm/src/reward_machines/reward_machine.py
- supp/pick-and-place domain code/lof/libs/qrm/src/reward_machines/reward_machine_utils.py
- supp/pick-and-place domain code/lof/libs/qrm/src/run.py
- supp/pick-and-place domain code/lof/libs/qrm/src/tester/
- supp/pick-and-place domain code/lof/libs/qrm/src/tester/__init__.py
- supp/pick-and-place domain code/lof/libs/qrm/src/tester/saver.py
- supp/pick-and-place domain code/lof/libs/qrm/src/tester/test_utils.py
- supp/pick-and-place domain code/lof/libs/qrm/src/tester/tester.py
- supp/pick-and-place domain code/lof/libs/qrm/src/tester/tester_craft.py
- supp/pick-and-place domain code/lof/libs/qrm/src/tester/tester_office.py
- supp/pick-and-place domain code/lof/libs/qrm/src/tester/tester_params.py
- supp/pick-and-place domain code/lof/libs/qrm/src/tester/tester_water.py
- supp/pick-and-place domain code/lof/libs/qrm/src/worlds/
- supp/pick-and-place domain code/lof/libs/qrm/src/worlds/__init__.py
- supp/pick-and-place domain code/lof/libs/qrm/src/worlds/craft_world.py
- supp/pick-and-place domain code/lof/libs/qrm/src/worlds/game.py
- supp/pick-and-place domain code/lof/libs/qrm/src/worlds/game_objects.py
- supp/pick-and-place domain code/lof/libs/qrm/src/worlds/office_world.py
- supp/pick-and-place domain code/lof/libs/qrm/src/worlds/water_world.py
- supp/pick-and-place domain code/lof/libs/spinningup/
- supp/pick-and-place domain code/lof/libs/spinningup/.gitignore
- supp/pick-and-place domain code/lof/libs/spinningup/.travis.yml
- supp/pick-and-place domain code/lof/libs/spinningup/LICENSE
- supp/pick-and-place domain code/lof/libs/spinningup/readme.md
- supp/pick-and-place domain code/lof/libs/spinningup/readthedocs.yml
- supp/pick-and-place domain code/lof/libs/spinningup/setup.py
- supp/pick-and-place domain code/lof/libs/spinningup/spinup/
- supp/pick-and-place domain code/lof/libs/spinningup/spinup/__init__.py
- supp/pick-and-place domain code/lof/libs/spinningup/spinup/algos/
- supp/pick-and-place domain code/lof/libs/spinningup/spinup/algos/__init__.py
- supp/pick-and-place domain code/lof/libs/spinningup/spinup/algos/pytorch/
- supp/pick-and-place domain code/lof/libs/spinningup/spinup/algos/pytorch/ddpg/
- supp/pick-and-place domain code/lof/libs/spinningup/spinup/algos/pytorch/ddpg/core.py
- supp/pick-and-place domain code/lof/libs/spinningup/spinup/algos/pytorch/ddpg/ddpg.py
- supp/pick-and-place domain code/lof/libs/spinningup/spinup/algos/pytorch/ppo/
- supp/pick-and-place domain code/lof/libs/spinningup/spinup/algos/pytorch/ppo/core.py
- supp/pick-and-place domain code/lof/libs/spinningup/spinup/algos/pytorch/ppo/ppo.py
- supp/pick-and-place domain code/lof/libs/spinningup/spinup/algos/pytorch/sac/
- supp/pick-and-place domain code/lof/libs/spinningup/spinup/algos/pytorch/sac/core.py
- supp/pick-and-place domain code/lof/libs/spinningup/spinup/algos/pytorch/sac/sac.py
- supp/pick-and-place domain code/lof/libs/spinningup/spinup/algos/pytorch/td3/
- supp/pick-and-place domain code/lof/libs/spinningup/spinup/algos/pytorch/td3/core.py
- supp/pick-and-place domain code/lof/libs/spinningup/spinup/algos/pytorch/td3/td3.py
- supp/pick-and-place domain code/lof/libs/spinningup/spinup/algos/pytorch/trpo/
- supp/pick-and-place domain code/lof/libs/spinningup/spinup/algos/pytorch/trpo/trpo.py
- supp/pick-and-place domain code/lof/libs/spinningup/spinup/algos/pytorch/vpg/
- supp/pick-and-place domain code/lof/libs/spinningup/spinup/algos/pytorch/vpg/core.py
- supp/pick-and-place domain code/lof/libs/spinningup/spinup/algos/pytorch/vpg/vpg.py
- supp/pick-and-place domain code/lof/libs/spinningup/spinup/algos/tf1/
- supp/pick-and-place domain code/lof/libs/spinningup/spinup/algos/tf1/ddpg/
- supp/pick-and-place domain code/lof/libs/spinningup/spinup/algos/tf1/ddpg/__init__.py
- supp/pick-and-place domain code/lof/libs/spinningup/spinup/algos/tf1/ddpg/core.py
- supp/pick-and-place domain code/lof/libs/spinningup/spinup/algos/tf1/ddpg/ddpg.py
- supp/pick-and-place domain code/lof/libs/spinningup/spinup/algos/tf1/ppo/
- supp/pick-and-place domain code/lof/libs/spinningup/spinup/algos/tf1/ppo/__init__.py
- supp/pick-and-place domain code/lof/libs/spinningup/spinup/algos/tf1/ppo/core.py
- supp/pick-and-place domain code/lof/libs/spinningup/spinup/algos/tf1/ppo/ppo.py
- supp/pick-and-place domain code/lof/libs/spinningup/spinup/algos/tf1/sac/
- supp/pick-and-place domain code/lof/libs/spinningup/spinup/algos/tf1/sac/__init__.py
- supp/pick-and-place domain code/lof/libs/spinningup/spinup/algos/tf1/sac/core.py
- supp/pick-and-place domain code/lof/libs/spinningup/spinup/algos/tf1/sac/sac.py
- supp/pick-and-place domain code/lof/libs/spinningup/spinup/algos/tf1/td3/
- supp/pick-and-place domain code/lof/libs/spinningup/spinup/algos/tf1/td3/__init__.py
- supp/pick-and-place domain code/lof/libs/spinningup/spinup/algos/tf1/td3/core.py
- supp/pick-and-place domain code/lof/libs/spinningup/spinup/algos/tf1/td3/td3.py
- supp/pick-and-place domain code/lof/libs/spinningup/spinup/algos/tf1/trpo/
- supp/pick-and-place domain code/lof/libs/spinningup/spinup/algos/tf1/trpo/__init__.py
- supp/pick-and-place domain code/lof/libs/spinningup/spinup/algos/tf1/trpo/core.py
- supp/pick-and-place domain code/lof/libs/spinningup/spinup/algos/tf1/trpo/trpo.py
- supp/pick-and-place domain code/lof/libs/spinningup/spinup/algos/tf1/vpg/
- supp/pick-and-place domain code/lof/libs/spinningup/spinup/algos/tf1/vpg/__init__.py
- supp/pick-and-place domain code/lof/libs/spinningup/spinup/algos/tf1/vpg/core.py
- supp/pick-and-place domain code/lof/libs/spinningup/spinup/algos/tf1/vpg/vpg.py
- supp/pick-and-place domain code/lof/libs/spinningup/spinup/examples/
- supp/pick-and-place domain code/lof/libs/spinningup/spinup/examples/pytorch/
- supp/pick-and-place domain code/lof/libs/spinningup/spinup/examples/pytorch/bench_ppo_cartpole.py
- supp/pick-and-place domain code/lof/libs/spinningup/spinup/examples/pytorch/pg_math/
- supp/pick-and-place domain code/lof/libs/spinningup/spinup/examples/pytorch/pg_math/1_simple_pg.py
- supp/pick-and-place domain code/lof/libs/spinningup/spinup/examples/pytorch/pg_math/2_rtg_pg.py
- supp/pick-and-place domain code/lof/libs/spinningup/spinup/examples/tf1/
- supp/pick-and-place domain code/lof/libs/spinningup/spinup/examples/tf1/bench_ppo_cartpole.py
- supp/pick-and-place domain code/lof/libs/spinningup/spinup/examples/tf1/pg_math/
- supp/pick-and-place domain code/lof/libs/spinningup/spinup/examples/tf1/pg_math/1_simple_pg.py
- supp/pick-and-place domain code/lof/libs/spinningup/spinup/examples/tf1/pg_math/2_rtg_pg.py
- supp/pick-and-place domain code/lof/libs/spinningup/spinup/examples/tf1/train_mnist.py
- supp/pick-and-place domain code/lof/libs/spinningup/spinup/exercises/
- supp/pick-and-place domain code/lof/libs/spinningup/spinup/exercises/common.py
- supp/pick-and-place domain code/lof/libs/spinningup/spinup/exercises/pytorch/
- supp/pick-and-place domain code/lof/libs/spinningup/spinup/exercises/pytorch/problem_set_1/
- supp/pick-and-place domain code/lof/libs/spinningup/spinup/exercises/pytorch/problem_set_1/exercise1_1.py
- supp/pick-and-place domain code/lof/libs/spinningup/spinup/exercises/pytorch/problem_set_1/exercise1_2.py
- supp/pick-and-place domain code/lof/libs/spinningup/spinup/exercises/pytorch/problem_set_1/exercise1_2_auxiliary.py
- supp/pick-and-place domain code/lof/libs/spinningup/spinup/exercises/pytorch/problem_set_1/exercise1_3.py
- supp/pick-and-place domain code/lof/libs/spinningup/spinup/exercises/pytorch/problem_set_1_solutions/
- supp/pick-and-place domain code/lof/libs/spinningup/spinup/exercises/pytorch/problem_set_1_solutions/exercise1_1_soln.py
- supp/pick-and-place domain code/lof/libs/spinningup/spinup/exercises/pytorch/problem_set_1_solutions/exercise1_2_soln.py
- supp/pick-and-place domain code/lof/libs/spinningup/spinup/exercises/pytorch/problem_set_2/
- supp/pick-and-place domain code/lof/libs/spinningup/spinup/exercises/pytorch/problem_set_2/exercise2_2.py
- supp/pick-and-place domain code/lof/libs/spinningup/spinup/exercises/tf1/
- supp/pick-and-place domain code/lof/libs/spinningup/spinup/exercises/tf1/problem_set_1/
- supp/pick-and-place domain code/lof/libs/spinningup/spinup/exercises/tf1/problem_set_1/exercise1_1.py
- supp/pick-and-place domain code/lof/libs/spinningup/spinup/exercises/tf1/problem_set_1/exercise1_2.py
- supp/pick-and-place domain code/lof/libs/spinningup/spinup/exercises/tf1/problem_set_1/exercise1_3.py
- supp/pick-and-place domain code/lof/libs/spinningup/spinup/exercises/tf1/problem_set_1_solutions/
- supp/pick-and-place domain code/lof/libs/spinningup/spinup/exercises/tf1/problem_set_1_solutions/exercise1_1_soln.py
- supp/pick-and-place domain code/lof/libs/spinningup/spinup/exercises/tf1/problem_set_1_solutions/exercise1_2_soln.py
- supp/pick-and-place domain code/lof/libs/spinningup/spinup/exercises/tf1/problem_set_2/
- supp/pick-and-place domain code/lof/libs/spinningup/spinup/exercises/tf1/problem_set_2/exercise2_2.py
- supp/pick-and-place domain code/lof/libs/spinningup/spinup/run.py
- supp/pick-and-place domain code/lof/libs/spinningup/spinup/user_config.py
- supp/pick-and-place domain code/lof/libs/spinningup/spinup/utils/
- supp/pick-and-place domain code/lof/libs/spinningup/spinup/utils/__init__.py
- supp/pick-and-place domain code/lof/libs/spinningup/spinup/utils/logx.py
- supp/pick-and-place domain code/lof/libs/spinningup/spinup/utils/mpi_pytorch.py
- supp/pick-and-place domain code/lof/libs/spinningup/spinup/utils/mpi_tf.py
- supp/pick-and-place domain code/lof/libs/spinningup/spinup/utils/mpi_tools.py
- supp/pick-and-place domain code/lof/libs/spinningup/spinup/utils/plot.py
- supp/pick-and-place domain code/lof/libs/spinningup/spinup/utils/run_entrypoint.py
- supp/pick-and-place domain code/lof/libs/spinningup/spinup/utils/run_utils.py
- supp/pick-and-place domain code/lof/libs/spinningup/spinup/utils/serialization_utils.py
- supp/pick-and-place domain code/lof/libs/spinningup/spinup/utils/test_policy.py
- supp/pick-and-place domain code/lof/libs/spinningup/spinup/version.py
- supp/pick-and-place domain code/lof/libs/spinningup/test/
- supp/pick-and-place domain code/lof/libs/spinningup/test/test_ppo.py
- supp/pick-and-place domain code/lof/libs/spinningup/travis_setup.sh
- supp/pick-and-place domain code/lof/README.md
- supp/pick-and-place domain code/lof/setup_path.sh
- supp/pick-and-place domain code/lof/src/
- supp/pick-and-place domain code/lof/src/__init__.py
- supp/pick-and-place domain code/lof/src/evaluate_composability.py
- supp/pick-and-place domain code/lof/src/evaluate_rm.py
- supp/pick-and-place domain code/lof/src/evaluate_training.py
- supp/pick-and-place domain code/lof/src/load_and_plot_data_composability.py
- supp/pick-and-place domain code/lof/src/load_and_plot_training.py
- supp/pick-and-place domain code/lof/src/model3500.pt
- supp/pick-and-place domain code/lof/src/option.py
- supp/pick-and-place domain code/lof/src/option_rollout.py
- supp/pick-and-place domain code/lof/src/rl_bench_robot_env.py
- supp/pick-and-place domain code/lof/src/rm_robot_env.py
- supp/pick-and-place domain code/lof/src/robot_env.py
- supp/pick-and-place domain code/lof/src/rollout.py
- supp/pick-and-place domain code/lof/src/test_arm.py
- supp/pick-and-place domain code/lof/src/test_option.py
- supp/pick-and-place domain code/lof/src/train.py
- supp/pick-and-place domain code/lof/src/train_rm.py
- supp/pick-and-place domain code/lof/src/ttt/
- supp/pick-and-place domain code/lof/src/ttt/scene_reinforcement_learning_env.ttt
- supp/reacher domain code/
- supp/reacher domain code/lof/
- supp/reacher domain code/lof/.gitignore
- supp/reacher domain code/lof/__init__.py
- supp/reacher domain code/lof/baselines/
- supp/reacher domain code/lof/baselines/__init__.py
- supp/reacher domain code/lof/baselines/rm/
- supp/reacher domain code/lof/baselines/rm/options/
- supp/reacher domain code/lof/baselines/rm/options/blue.txt
- supp/reacher domain code/lof/baselines/rm/options/green.txt
- supp/reacher domain code/lof/baselines/rm/options/red.txt
- supp/reacher domain code/lof/baselines/rm/tasks/
- supp/reacher domain code/lof/baselines/rm/tasks/composite.txt
- supp/reacher domain code/lof/baselines/rm/tasks/IF.txt
- supp/reacher domain code/lof/baselines/rm/tasks/OR.txt
- supp/reacher domain code/lof/baselines/rm/tasks/sequential.txt
- supp/reacher domain code/lof/baselines/rm/tasks/task1.txt
- supp/reacher domain code/lof/env/
- supp/reacher domain code/lof/env/mujoco_env/
- supp/reacher domain code/lof/env/mujoco_env/__init__.py
- supp/reacher domain code/lof/env/mujoco_env/assets/
- supp/reacher domain code/lof/env/mujoco_env/assets/reacher.xml
- supp/reacher domain code/lof/env/mujoco_env/reacher_env.py
- supp/reacher domain code/lof/environment.yml
- supp/reacher domain code/lof/evaluate_composability.py
- supp/reacher domain code/lof/evaluate_rm.py
- supp/reacher domain code/lof/evaluate_satisfaction.py
- supp/reacher domain code/lof/experiments/
- supp/reacher domain code/lof/experiments/red/
- supp/reacher domain code/lof/experiments/red/config.json
- supp/reacher domain code/lof/experiments/red/progress.txt
- supp/reacher domain code/lof/external_lib/
- supp/reacher domain code/lof/external_lib/__init__.py
- supp/reacher domain code/lof/external_lib/qrm/
- supp/reacher domain code/lof/external_lib/qrm/README.md
- supp/reacher domain code/lof/external_lib/qrm/scripts/
- supp/reacher domain code/lof/external_lib/qrm/scripts/craft.sh
- supp/reacher domain code/lof/external_lib/qrm/scripts/office.sh
- supp/reacher domain code/lof/external_lib/qrm/scripts/water.sh
- supp/reacher domain code/lof/external_lib/qrm/src/
- supp/reacher domain code/lof/external_lib/qrm/src/__init__.py
- supp/reacher domain code/lof/external_lib/qrm/src/baselines/
- supp/reacher domain code/lof/external_lib/qrm/src/baselines/__init__.py
- supp/reacher domain code/lof/external_lib/qrm/src/baselines/dqn.py
- supp/reacher domain code/lof/external_lib/qrm/src/baselines/feature_proxy.py
- supp/reacher domain code/lof/external_lib/qrm/src/baselines/hrl.py
- supp/reacher domain code/lof/external_lib/qrm/src/baselines/policy_bank.py
- supp/reacher domain code/lof/external_lib/qrm/src/baselines/replay_buffer.py
- supp/reacher domain code/lof/external_lib/qrm/src/baselines/run_dqn.py
- supp/reacher domain code/lof/external_lib/qrm/src/baselines/run_hrl.py
- supp/reacher domain code/lof/external_lib/qrm/src/common/
- supp/reacher domain code/lof/external_lib/qrm/src/common/__init__.py
- supp/reacher domain code/lof/external_lib/qrm/src/common/curriculum.py
- supp/reacher domain code/lof/external_lib/qrm/src/common/replay_buffer.py
- supp/reacher domain code/lof/external_lib/qrm/src/common/schedules.py
- supp/reacher domain code/lof/external_lib/qrm/src/common/segment_tree.py
- supp/reacher domain code/lof/external_lib/qrm/src/export_summary.py
- supp/reacher domain code/lof/external_lib/qrm/src/qrm/
- supp/reacher domain code/lof/external_lib/qrm/src/qrm/__init__.py
- supp/reacher domain code/lof/external_lib/qrm/src/qrm/dqn_network.py
- supp/reacher domain code/lof/external_lib/qrm/src/qrm/learning_params.py
- supp/reacher domain code/lof/external_lib/qrm/src/qrm/policy_bank.py
- supp/reacher domain code/lof/external_lib/qrm/src/qrm/policy_bank_dqn.py
- supp/reacher domain code/lof/external_lib/qrm/src/qrm/qrm.py
- supp/reacher domain code/lof/external_lib/qrm/src/reward_machines/
- supp/reacher domain code/lof/external_lib/qrm/src/reward_machines/__init__.py
- supp/reacher domain code/lof/external_lib/qrm/src/reward_machines/reward_functions.py
- supp/reacher domain code/lof/external_lib/qrm/src/reward_machines/reward_machine.py
- supp/reacher domain code/lof/external_lib/qrm/src/reward_machines/reward_machine_utils.py
- supp/reacher domain code/lof/external_lib/qrm/src/run.py
- supp/reacher domain code/lof/external_lib/qrm/src/tester/
- supp/reacher domain code/lof/external_lib/qrm/src/tester/__init__.py
- supp/reacher domain code/lof/external_lib/qrm/src/tester/saver.py
- supp/reacher domain code/lof/external_lib/qrm/src/tester/test_utils.py
[truncated: 129 more entries]
