# Supplementary material
Source: ML conference proceedings conference paper supplement (https://proceedings.mlr.press/v139/araki21a.html)
Supplement: Supplementary file 1 [file araki21a-supp.zip › supp/delivery domain code/lof/README.md]

# The Logical Options Framework

Note: This repository contains code for the discrete delivery domain. A separate repository contains code for the continuous reacher domain.

 ## Installation
 
 `conda env create -f environment.yml`
 
 will create a conda environment called 'lof'

 ## Running Satisfaction and Composability Experiments
 
 For satisfaction experiments, run: `python tests/satisfaction_delivery.py`
 
 For composability epxeriments, run: `python tests/composability_delivery.py`
 
 The data generated from these experiments is saved in `dataset/{satisfaction|composability}/{task_name}/{test_num}.npz`

 ## Plot Experiments
 
 To plot satisfaction results: `python tests/load_and_plot_results_satisfaction.py`
 
 To plot composability results: `python tests/load_and_plot_results_composability.py`

 Plots are saved in `dataset/satisfaction` and `dataset/composability`

## Visualize Algorithm

To make animated gifs of any of the algorithms run the associated test file in `tests/test_qlearning_{alg_name}.py`
