# Supplementary material
Source: ML conference proceedings conference paper supplement (https://proceedings.mlr.press/v139/araki21a.html)
Supplement: Supplementary file 1 [file araki21a-supp.zip › supp/delivery domain code/lof/simulator/proposition.py]

import numpy as np

class Proposition(object):

    def __init__(self, name):
        self.name = name
        self.value = None

    # returns True or False based on the obj_state of the environment
    # eval cannot depend on the values of other propositions or on
    # information from previous timesteps
    def eval(self, obj_dict):
        raise NotImplementedError

# this prop is kind of an exception to how I've defined props
# because it's value does not depend on the state but it rather
# random at every time step. However, this could be accounted for by
# adding an extra dimension to the state space and attaching this
# prop's value to it
class ExternalProp(Proposition):

    def __init__(self, name, value):
        super().__init__(name)
        self.value = value

    def eval(self, obj_dict):

        return self.value

# this is like an AND statement over two props
# if this is true, then when you return the overall prop state,
# list the children props as 0 and this prop as 1
class CombinedProp(Proposition):

    def __init__(self, name, prop1, prop2, prop_idxs):
        super().__init__(name)
        self.prop1 = prop1
        self.prop2 = prop2
        self.prop_idxs = prop_idxs

    def eval(self, obj_dict):
        self.value = (self.prop1.value and self.prop2.value)

        return self.value

# true if ball_a_location == basket_location
# neither obj can be a StaticObj
class SameLocationProp(Proposition):

    def __init__(self, name, obj_name1, obj_name2):
        super().__init__(name)

        self.obj1 = obj_name1
        self.obj2 = obj_name2

    def eval(self, obj_dict):
        obj_state1 = obj_dict[self.obj1].state
        obj_state2 = obj_dict[self.obj2].state

        self.value = (obj_state1 == obj_state2)

        return self.value

class OnObstacleProp(Proposition):

    def __init__(self, name, obj_name, obstacle_name):
        super().__init__(name)

        self.obj = obj_name
        self.obstacle = obstacle_name

    def eval(self, obj_dict):


        obj_state = obj_dict[self.obj].get_state()
        obstacle_state = obj_dict[self.obstacle].state

        if type(obj_dict[self.obj]).mro()[1].__name__ == 'CarAgentObj':
            real_state = obj_dict[self.obj].get_rrt_state()
            if obstacle_state[obj_state[0], obj_state[1]].item() == 1:
                self.value = (real_state[0] == float(obj_state[0]) and real_state[1] == float(obj_state[1]))
            else:
                self.value = False
        else:
            self.value = (obstacle_state[obj_state[0], obj_state[1]].item() == 1)

        if self.value is not False and self.value is not True:
            print('f')

        return self.value
