# Supplementary material
Source: ML conference proceedings conference paper supplement (https://proceedings.mlr.press/v139/araki21a.html)
Supplement: Supplementary file 1 [file araki21a-supp.zip › supp/delivery domain code/lof/simulator/simulator.py]

import numpy as np

class Sim(object):
    r"""Based off of the OpenAI Gym class Env.
        But this class is for IMITATION LEARNING, not RL. So reward-related
        stuff has been taken out.
        The main API methods that users of this class need to know are:
            step
            reset
            render
            close
            seed
        And set the following attributes:
            action_space: The Space object corresponding to valid actions
            observation_space: The Space object corresponding to valid observations
    """

    action_space = None
    observation_space = None

    """ how to deal with proposition values?
    the challenge is that as you have to apply object dynamics in sequence,
    the proposition values of the state will change after each object moves.
    this could create problems, since the order in which objects move, which
    shouldn't matter (in theory they all move in parallel), will matter.
    We can get around this by preserving the proposition state of the environment
    BEFORE any object moves, and use this to evaluate object dynamics. Only once
    every object moves do we then update the proposition state of the environment.
    """
    def step(self, action):
        """Run one timestep of the environment's dynamics. When end of
        episode is reached, you are responsible for calling `reset()`
        to reset this environment's state.
        Accepts an action and returns a tuple (observation, done, info).
        Args:
            action (object): an action provided by the agent
        Returns:
            observation (object): agent's observation of the current environment
            done (bool): whether the episode has ended, in which case further step() calls will return undefined results
            info (dict): contains auxiliary diagnostic information (helpful for debugging, and sometimes learning)
        """
        raise NotImplementedError

    def reset(self):
        """Resets the state of the environment and returns an initial observation.
        Returns:
            observation (object): the initial observation.
        """
        raise NotImplementedError

    def render(self, mode='human'):
        """Renders the environment.
        The set of supported modes varies per environment. (And some
        environments do not support rendering at all.) By convention,
        if mode is:
        - human: render to the current display or terminal and
          return nothing. Usually for human consumption.
        - rgb_array: Return an numpy.ndarray with shape (x, y, 3),
          representing RGB values for an x-by-y pixel image, suitable
          for turning into a video.
        - ansi: Return a string (str) or StringIO.StringIO containing a
          terminal-style text representation. The text can include newlines
          and ANSI escape sequences (e.g. for colors).
        Note:
            Make sure that your class's metadata 'render.modes' key includes
              the list of supported modes. It's recommended to call super()
              in implementations to use the functionality of this method.
        Args:
            mode (str): the mode to render with
        Example:
        class MyEnv(Env):
            metadata = {'render.modes': ['human', 'rgb_array']}
            def render(self, mode='human'):
                if mode == 'rgb_array':
                    return np.array(...) # return RGB frame suitable for video
                elif mode == 'human':
                    ... # pop up a window and render
                else:
                    super(MyEnv, self).render(mode=mode) # just raise an exception
        """
        raise NotImplementedError

    def close(self):
        """Override close in your subclass to perform any necessary cleanup.
        Environments will automatically close() themselves when
        garbage collected or when the program exits.
        """
        pass

    def seed(self, seed=None):
        """Sets the seed for this env's random number generator(s).
        Note:
            Some environments use multiple pseudorandom number generators.
            We want to capture all such seeds used in order to ensure that
            there aren't accidental correlations between multiple generators.
        Returns:
            list<bigint>: Returns the list of seeds used in this env's random
              number generators. The first value in the list should be the
              "main" seed, or the value which a reproducer should pass to
              'seed'. Often, the main seed equals the provided 'seed', but
              this won't be true if seed=None, for example.
        """
        return

    
