# Supplementary material
Source: ML conference proceedings conference paper supplement (https://proceedings.mlr.press/v139/araki21a.html)
Supplement: Supplementary file 1 [file araki21a-supp.zip › supp/pick-and-place domain code/lof/libs/qrm/rm/tasks/if.txt]

0 # initial state
(0,0,'!r&!y&!c',ConstantRewardFunction(0))
(0,1,'r&!c',ConstantRewardFunction(0))
(0,2,'c&!r',ConstantRewardFunction(0))
(1,1,'!c&!y',ConstantRewardFunction(0))
(1,3,'y|c',ConstantRewardFunction(1))
(2,2,'!y',ConstantRewardFunction(0))
(2,3,'y',ConstantRewardFunction(0))
(3,3,'True',ConstantRewardFunction(0))
