# Supplementary material
Source: ML conference proceedings conference paper supplement (https://proceedings.mlr.press/v139/araki21a.html)
Supplement: Supplementary file 1 [file araki21a-supp.zip › supp/pick-and-place domain code/lof/libs/qrm/rm/tasks/or.txt]

0 # initial state
(0,0,'!r&!g',ConstantRewardFunction(0))
(0,1,'r|g',ConstantRewardFunction(0))
(1,1,'!b',ConstantRewardFunction(0))
(1,2,'b',ConstantRewardFunction(1))
(2,2,'True',ConstantRewardFunction(0))
