# Supplementary material
Source: ML conference proceedings conference paper supplement (https://proceedings.mlr.press/v139/araki21a.html)
Supplement: Supplementary file 1 [file araki21a-supp.zip › supp/pick-and-place domain code/lof/libs/qrm/rm/tasks/sequential.txt]

0 # initial state
(0,0,'!r',ConstantRewardFunction(0))
(0,1,'r',ConstantRewardFunction(0))
(1,1,'!g',ConstantRewardFunction(0))
(1,2,'g',ConstantRewardFunction(0))
(2,2,'!b',ConstantRewardFunction(0))
(2,3,'b',ConstantRewardFunction(0))
(3,3,'!y',ConstantRewardFunction(0))
(3,4,'y',ConstantRewardFunction(1))
(4,4,'True',ConstantRewardFunction(0))
