# Supplementary material
Source: ML conference proceedings conference paper supplement (https://proceedings.mlr.press/v139/araki21a.html)
Supplement: Supplementary file 1 [file araki21a-supp.zip › supp/pick-and-place domain code/lof/libs/qrm/scripts/office.sh]

cd ../src
python3 run.py --algorithm="dqn" --world="office" --num_times=30 &&
python3 run.py --algorithm="hrl" --world="office" --num_times=30 &&
python3 run.py --algorithm="hrl-rm" --world="office" --num_times=30 &&
python3 run.py --algorithm="qrm" --world="office" --num_times=30 &&
python3 run.py --algorithm="qrm-rs" --world="office" --num_times=30
