# Supplementary material
Source: ML conference proceedings conference paper supplement (https://proceedings.mlr.press/v139/araki21a.html)
Supplement: Supplementary file 1 [file araki21a-supp.zip › supp/pick-and-place domain code/lof/libs/qrm/src/__init__.py]

from . import baselines
from . import common
from . import reward_machines
#from . import rl
from . import worlds
