# Supplementary material
Source: ML conference proceedings conference paper supplement (https://proceedings.mlr.press/v139/araki21a.html)
Supplement: Supplementary file 1 [file araki21a-supp.zip › supp/pick-and-place domain code/lof/libs/qrm/src/qrm/qrm.py]

import numpy as np
import random, time
import tensorflow as tf
from worlds.game import *
from qrm.policy_bank_dqn import PolicyBankDQN
from common.schedules import LinearSchedule
from common.replay_buffer import create_experience_replay_buffer
from tester.saver import Saver


def run_qrm_task(sess, rm_file, policy_bank, tester, curriculum, replay_buffer, beta_schedule, show_print):
    """
    This code runs one training episode. 
        - rm_file: It is the path towards the RM machine to solve on this episode
    """
    # Initializing parameters and the game
    learning_params = tester.learning_params
    testing_params = tester.testing_params
    reward_machines = tester.get_reward_machines()
    task_rm_id = tester.get_reward_machine_id_from_file(rm_file)
    task_params = tester.get_task_params(rm_file)
    task = Game(task_params)
    actions = task.get_actions()
    num_features = len(task.get_features())
    num_steps = learning_params.max_timesteps_per_task
    rm = reward_machines[task_rm_id]
    training_reward = 0
    # Getting the initial state of the environment and the reward machine
    s1, s1_features = task.get_state_and_features()
    u1 = rm.get_initial_state()

    # Starting interaction with the environment
    if show_print: print("Executing", num_steps)
    for t in range(num_steps):

        # Choosing an action to perform
        if random.random() < 0.1:
            a = random.choice(actions)
        else: 
            a = policy_bank.get_best_action(task_rm_id, u1, s1_features.reshape((1,num_features)))

        # updating the curriculum
        curriculum.add_step()
                
        # Executing the action
        task.execute_action(a)
        s2, s2_features = task.get_state_and_features()
        events = task.get_true_propositions()
        u2 = rm.get_next_state(u1, events)
        reward = rm.get_reward(u1,u2,s1,a,s2,is_training=True)
        training_reward += reward
        
        # Getting rewards and next states for each reward machine
        rewards, next_states = [],[]
        for j in range(len(reward_machines)):
            j_rewards, j_next_states = reward_machines[j].get_rewards_and_next_states(s1, a, s2, events,is_training=True)
            rewards.append(j_rewards)
            next_states.append(j_next_states)
        # Mapping rewards and next states to specific policies in the policy bank
        rewards = policy_bank.select_rewards(rewards)
        next_policies = policy_bank.select_next_policies(next_states)

        # Adding this experience to the experience replay buffer
        replay_buffer.add(s1_features, a, s2_features, rewards, next_policies)

        # Learning
        if curriculum.get_current_step() > learning_params.learning_starts and curriculum.get_current_step() % learning_params.train_freq == 0:
            if learning_params.prioritized_replay:
                experience = replay_buffer.sample(learning_params.batch_size, beta=beta_schedule.value(curriculum.get_current_step()))
                S1, A, S2, Rs, NPs, weights, batch_idxes = experience
            else:
                S1, A, S2, Rs, NPs = replay_buffer.sample(learning_params.batch_size)
                weights, batch_idxes = None, None
            abs_td_errors = policy_bank.learn(S1, A, S2, Rs, NPs, weights) # returns the absolute td_error
            if learning_params.prioritized_replay:
                new_priorities = abs_td_errors + learning_params.prioritized_replay_eps
                replay_buffer.update_priorities(batch_idxes, new_priorities)
            
        # Updating the target network
        if curriculum.get_current_step() > learning_params.learning_starts and curriculum.get_current_step() % learning_params.target_network_update_freq == 0:
            policy_bank.update_target_network()

        # Printing
        if show_print and (t+1) % learning_params.print_freq == 0:
            print("Step:", t+1, "\tTotal reward:", training_reward)

        # Testing
        if testing_params.test and curriculum.get_current_step() % testing_params.test_freq == 0:
            tester.run_test(curriculum.get_current_step(), sess, run_qrm_test, policy_bank, num_features)

        # Restarting the environment (Game Over)
        if task.is_env_game_over() or rm.is_terminal_state(u2):
            # Restarting the game
            task = Game(task_params)
            s2, s2_features = task.get_state_and_features()
            u2 = rm.get_initial_state()

            if curriculum.stop_task(t):
                break
        
        # checking the steps time-out
        if curriculum.stop_learning():
            break

        # Moving to the next state
        s1, s1_features, u1 = s2, s2_features, u2

    if show_print: print("Done! Total reward:", training_reward)


def run_qrm_test(sess, reward_machines, task_params, task_rm_id, learning_params, testing_params, policy_bank, num_features):
    # Initializing parameters
    task = Game(task_params)
    rm = reward_machines[task_rm_id]
    s1, s1_features = task.get_state_and_features()
    u1 = rm.get_initial_state()

    # Starting interaction with the environment
    r_total = 0
    for t in range(testing_params.num_steps):
        # Choosing an action using the right policy
        a = policy_bank.get_best_action(task_rm_id, u1, s1_features.reshape((1,num_features)), add_noise=False)

        # Executing the action
        task.execute_action(a)
        s2, s2_features = task.get_state_and_features()
        u2 = rm.get_next_state(u1, task.get_true_propositions())
        r = rm.get_reward(u1,u2,s1,a,s2,is_training=False)

        r_total += r * learning_params.gamma**t
        
        # Restarting the environment (Game Over)
        if task.is_env_game_over() or rm.is_terminal_state(u2):
            break
        
        # Moving to the next state
        s1, s1_features, u1 = s2, s2_features, u2
    
    return r_total

def run_qrm_experiments(alg_name, tester, curriculum, num_times, show_print):

    # Setting up the saver
    saver = Saver(alg_name, tester, curriculum)
    learning_params = tester.learning_params
    # Running the tasks 'num_times'
    time_init = time.time()
    for t in range(num_times):
        # Setting the random seed to 't'
        random.seed(t)
        sess = tf.compat.v1.Session()
        # Reseting default values
        curriculum.restart()

        # Creating the experience replay buffer
        replay_buffer, beta_schedule = create_experience_replay_buffer(learning_params.buffer_size, learning_params.prioritized_replay, learning_params.prioritized_replay_alpha, learning_params.prioritized_replay_beta0, curriculum.total_steps if learning_params.prioritized_replay_beta_iters is None else learning_params.prioritized_replay_beta_iters)

        # Creating policy bank
        task_aux = Game(tester.get_task_params(curriculum.get_current_task()))
        num_features = len(task_aux.get_features())
        num_actions  = len(task_aux.get_actions())

        policy_bank = PolicyBankDQN(sess, num_actions, num_features, learning_params, tester.get_reward_machines())

        # Task loop
        while not curriculum.stop_learning():
            if show_print: print("Current step:", curriculum.get_current_step(), "from", curriculum.total_steps)
            rm_file = curriculum.get_next_task()
            # Running 'task_rm_id' for one episode
            run_qrm_task(sess, rm_file, policy_bank, tester, curriculum, replay_buffer, beta_schedule, show_print)
        tf.reset_default_graph()
        sess.close()
        
        # Backing up the results
        saver.save_results()

    # Showing results
    tester.show_results()
    print("Time:", "%0.2f"%((time.time() - time_init)/60), "mins")
