# Supplementary material
Source: ML conference proceedings conference paper supplement (https://proceedings.mlr.press/v139/araki21a.html)
Supplement: Supplementary file 1 [file araki21a-supp.zip › supp/pick-and-place domain code/lof/libs/qrm/src/reward_machines/reward_functions.py]

import math

class RewardFunction:
    def __init__(self):
        pass

    # To implement...
    def get_reward(self, s1, a, s2):
        raise NotImplementedError("To be implemented")

    def get_type(self):
        raise NotImplementedError("To be implemented")

    def compare_to(self, other):
        raise NotImplementedError("To be implemented")

class ConstantRewardFunction(RewardFunction):
    """
    Defines a constant reward for a 'simple reward machine'
    """
    def __init__(self, c):
        super().__init__()
        self.c = c

    def get_type(self):
        return "constant"

    def compare_to(self, other):
        return self.get_type() == other.get_type() and self.c == other.c

    def get_reward(self,s1, a, s2):
        return self.c
