# Supplementary material
Source: ML conference proceedings conference paper supplement (https://proceedings.mlr.press/v139/araki21a.html)
Supplement: Supplementary file 1 [file araki21a-supp.zip › supp/pick-and-place domain code/lof/libs/qrm/src/tester/tester_params.py]

class TestingParameters:
    def __init__(self, test = True, test_freq=1000, num_steps = 100):
        """Parameters
        -------
        test: bool
            if True, we test current policy during training
        test_freq: int
            test the model every `test_freq` steps.
        num_steps: int
            number of steps during testing
        """
        self.test = test
        self.test_freq = test_freq
        self.num_steps = num_steps
    
