# Supplementary material
Source: ML conference proceedings conference paper supplement (https://proceedings.mlr.press/v139/araki21a.html)
Supplement: Supplementary file 1 [file araki21a-supp.zip › supp/pick-and-place domain code/lof/libs/qrm/src/worlds/game_objects.py]

from enum import Enum
import random

"""
The following classes are the types of objects that we are currently supporting 
"""

class Entity:
    def __init__(self,i,j): #row and column
        self.i = i
        self.j = j

    def change_position(self,i,j):
        self.i = i
        self.j = j
        
    def idem_position(self,i,j):
        return self.i==i and self.j==j

    def interact(self, agent):
        return True

class Agent(Entity):
    def __init__(self,i,j,actions):
        super().__init__(i,j)
        self.actions = actions

    def get_actions(self):
        return self.actions

    def __str__(self):
        return "A"

class Obstacle(Entity):
    def __init__(self,i,j):
        super().__init__(i,j)

    def interact(self, agent):
        return False

    def __str__(self):
        return "X"

class Empty(Entity):
    def __init__(self,i,j,label=" "):
        super().__init__(i,j)
        self.label = label

    def __str__(self):
        return self.label


"""
Enum with the actions that the agent can execute
"""
class Actions(Enum):
    up    = 0 # move up
    right = 1 # move right
    down  = 2 # move down
    left  = 3 # move left
    none  = 4 # none or pick
    drop  = 5
