# Supplementary material
Source: ML conference proceedings conference paper supplement (https://proceedings.mlr.press/v139/araki21a.html)
Supplement: Supplementary file 1 [file araki21a-supp.zip › supp/pick-and-place domain code/lof/libs/spinningup/spinup/algos/pytorch/trpo/trpo.py]

def trpo(*args, **kwargs):
    print('\n\nUnfortunately, TRPO has not yet been implemented in PyTorch '\
        + 'for Spinning Up. TRPO will migrate some time in the future.\n\n')
    raise NotImplementedError
