# Supplementary material
Source: ML conference proceedings conference paper supplement (https://proceedings.mlr.press/v139/araki21a.html)
Supplement: Supplementary file 1 [file araki21a-supp.zip › supp/pick-and-place domain code/lof/libs/spinningup/spinup/algos/tf1/sac/core.py]

import numpy as np
import tensorflow as tf

EPS = 1e-8

def placeholder(dim=None):
    return tf.placeholder(dtype=tf.float32, shape=(None,dim) if dim else (None,))

def placeholders(*args):
    return [placeholder(dim) for dim in args]

def mlp(x, hidden_sizes=(32,), activation=tf.tanh, output_activation=None):
    for h in hidden_sizes[:-1]:
        x = tf.layers.dense(x, units=h, activation=activation)
    return tf.layers.dense(x, units=hidden_sizes[-1], activation=output_activation)

def get_vars(scope):
    return [x for x in tf.global_variables() if scope in x.name]

def count_vars(scope):
    v = get_vars(scope)
    return sum([np.prod(var.shape.as_list()) for var in v])

def gaussian_likelihood(x, mu, log_std):
    pre_sum = -0.5 * (((x-mu)/(tf.exp(log_std)+EPS))**2 + 2*log_std + np.log(2*np.pi))
    return tf.reduce_sum(pre_sum, axis=1)


"""
Policies
"""

LOG_STD_MAX = 2
LOG_STD_MIN = -20

def mlp_gaussian_policy(x, a, hidden_sizes, activation, output_activation):
    act_dim = a.shape.as_list()[-1]
    net = mlp(x, list(hidden_sizes), activation, activation)
    mu = tf.layers.dense(net, act_dim, activation=output_activation)
    log_std = tf.layers.dense(net, act_dim, activation=None)
    log_std = tf.clip_by_value(log_std, LOG_STD_MIN, LOG_STD_MAX)

    std = tf.exp(log_std)
    pi = mu + tf.random_normal(tf.shape(mu)) * std
    logp_pi = gaussian_likelihood(pi, mu, log_std)
    return mu, pi, logp_pi

def apply_squashing_func(mu, pi, logp_pi):
    # Adjustment to log prob
    # NOTE: This formula is a little bit magic. To get an understanding of where it
    # comes from, check out the original SAC paper (arXiv 1801.01290) and look in
    # appendix C. This is a more numerically-stable equivalent to Eq 21.
    # Try deriving it yourself as a (very difficult) exercise. :)
    logp_pi -= tf.reduce_sum(2*(np.log(2) - pi - tf.nn.softplus(-2*pi)), axis=1)

    # Squash those unbounded actions!
    mu = tf.tanh(mu)
    pi = tf.tanh(pi)
    return mu, pi, logp_pi

"""
Actor-Critics
"""
def mlp_actor_critic(x, a, hidden_sizes=(256,256), activation=tf.nn.relu, 
                     output_activation=None, policy=mlp_gaussian_policy, action_space=None):
    # policy
    with tf.variable_scope('pi'):
        mu, pi, logp_pi = policy(x, a, hidden_sizes, activation, output_activation)
        mu, pi, logp_pi = apply_squashing_func(mu, pi, logp_pi)

    # make sure actions are in correct range
    action_scale = action_space.high[0]
    mu *= action_scale
    pi *= action_scale

    # vfs
    vf_mlp = lambda x : tf.squeeze(mlp(x, list(hidden_sizes)+[1], activation, None), axis=1)
    with tf.variable_scope('q1'):
        q1 = vf_mlp(tf.concat([x,a], axis=-1))
    with tf.variable_scope('q2'):
        q2 = vf_mlp(tf.concat([x,a], axis=-1))
    return mu, pi, logp_pi, q1, q2
