# Supplementary material
Source: ML conference proceedings conference paper supplement (https://proceedings.mlr.press/v139/araki21a.html)
Supplement: Supplementary file 1 [file araki21a-supp.zip › supp/pick-and-place domain code/lof/libs/spinningup/spinup/examples/tf1/bench_ppo_cartpole.py]

from spinup.utils.run_utils import ExperimentGrid
from spinup import ppo_tf1
import tensorflow as tf

if __name__ == '__main__':
    import argparse
    parser = argparse.ArgumentParser()
    parser.add_argument('--cpu', type=int, default=4)
    parser.add_argument('--num_runs', type=int, default=3)
    args = parser.parse_args()

    eg = ExperimentGrid(name='ppo-tf1-bench')
    eg.add('env_name', 'CartPole-v0', '', True)
    eg.add('seed', [10*i for i in range(args.num_runs)])
    eg.add('epochs', 10)
    eg.add('steps_per_epoch', 4000)
    eg.add('ac_kwargs:hidden_sizes', [(32,), (64,64)], 'hid')
    eg.add('ac_kwargs:activation', [tf.tanh, tf.nn.relu], '')
    eg.run(ppo_tf1, num_cpu=args.cpu)
