# Supplementary material
Source: ML conference proceedings conference paper supplement (https://proceedings.mlr.press/v139/araki21a.html)
Supplement: Supplementary file 1 [file araki21a-supp.zip › supp/pick-and-place domain code/lof/libs/spinningup/spinup/exercises/common.py]

def print_result(correct=False):
    print('\n'*5 + '='*50 + '\n'*3)
    if correct:
        print("Congratulations! Your answer is correct.")
    else:
        print("Your answer appears to be incorrect. Try again!")
    print('\n'*3 + '='*50)
