# Supplementary material
Source: ML conference proceedings conference paper supplement (https://proceedings.mlr.press/v139/araki21a.html)
Supplement: Supplementary file 1 [file araki21a-supp.zip › supp/pick-and-place domain code/lof/libs/spinningup/spinup/exercises/pytorch/problem_set_1_solutions/exercise1_1_soln.py]

import torch
import numpy as np

EPS=1e-8

def gaussian_likelihood(x, mu, log_std):
    pre_sum = -0.5 * (((x-mu)/(torch.exp(log_std)+EPS))**2 + 2*log_std + np.log(2*np.pi))
    return pre_sum.sum(axis=-1)
