# Supplementary material
Source: ML conference proceedings conference paper supplement (https://proceedings.mlr.press/v139/araki21a.html)
Supplement: Supplementary file 1 [file araki21a-supp.zip › supp/pick-and-place domain code/lof/libs/spinningup/spinup/exercises/pytorch/problem_set_1_solutions/exercise1_2_soln.py]

import torch
import torch.nn as nn
import numpy as np

EPS=1e-8

def mlp(sizes, activation, output_activation=nn.Identity):
    layers = []
    for j in range(len(sizes)-1):
        act = activation if j < len(sizes)-2 else output_activation
        layers += [nn.Linear(sizes[j], sizes[j+1]), act()]
    return nn.Sequential(*layers)

def gaussian_likelihood(x, mu, log_std):
    pre_sum = -0.5 * (((x-mu)/(torch.exp(log_std)+EPS))**2 + 2*log_std + np.log(2*np.pi))
    return pre_sum.sum(axis=-1)


class DiagonalGaussianDistribution:

    def __init__(self, mu, log_std):
        self.mu = mu
        self.log_std = log_std

    def sample(self):
        return self.mu + torch.exp(self.log_std) * torch.randn_like(self.mu)

    def log_prob(self, value):
        return gaussian_likelihood(value, self.mu, self.log_std)

    def entropy(self):
        return 0.5 + 0.5 * np.log(2 * np.pi) + self.log_std.sum(axis=-1)


class MLPGaussianActor(nn.Module):

    def __init__(self, obs_dim, act_dim, hidden_sizes, activation):
        super().__init__()
        log_std = -0.5 * np.ones(act_dim, dtype=np.float32)
        self.log_std = torch.nn.Parameter(torch.as_tensor(log_std))
        self.mu_net = mlp([obs_dim] + list(hidden_sizes) + [act_dim], activation)

    def forward(self, obs, act=None):
        mu = self.mu_net(obs)
        pi = DiagonalGaussianDistribution(mu, self.log_std)
        logp_a = None
        if act is not None:
            logp_a = pi.log_prob(act)
        return pi, logp_a
