# Supplementary material
Source: ML conference proceedings conference paper supplement (https://proceedings.mlr.press/v139/araki21a.html)
Supplement: Supplementary file 1 [file araki21a-supp.zip › supp/pick-and-place domain code/lof/libs/spinningup/spinup/exercises/tf1/problem_set_1/exercise1_1.py]

import tensorflow as tf
import numpy as np

"""

Exercise 1.1: Diagonal Gaussian Likelihood

Write a function which takes in Tensorflow symbols for the means and 
log stds of a batch of diagonal Gaussian distributions, along with a 
Tensorflow placeholder for (previously-generated) samples from those 
distributions, and returns a Tensorflow symbol for computing the log 
likelihoods of those samples.

"""

def gaussian_likelihood(x, mu, log_std):
    """
    Args:
        x: Tensor with shape [batch, dim]
        mu: Tensor with shape [batch, dim]
        log_std: Tensor with shape [batch, dim] or [dim]

    Returns:
        Tensor with shape [batch]
    """
    #######################
    #                     #
    #   YOUR CODE HERE    #
    #                     #
    #######################
    return tf.constant(0)


if __name__ == '__main__':
    """
    Run this file to verify your solution.
    """
    from spinup.exercises.tf1.problem_set_1_solutions import exercise1_1_soln
    from spinup.exercises.common import print_result

    sess = tf.Session()

    dim = 10
    x = tf.placeholder(tf.float32, shape=(None, dim))
    mu = tf.placeholder(tf.float32, shape=(None, dim))
    log_std = tf.placeholder(tf.float32, shape=(dim,))

    your_gaussian_likelihood = gaussian_likelihood(x, mu, log_std)
    true_gaussian_likelihood = exercise1_1_soln.gaussian_likelihood(x, mu, log_std)

    batch_size = 32
    feed_dict = {x: np.random.rand(batch_size, dim),
                 mu: np.random.rand(batch_size, dim),
                 log_std: np.random.rand(dim)}

    your_result, true_result = sess.run([your_gaussian_likelihood, true_gaussian_likelihood],
                                        feed_dict=feed_dict)

    correct = np.allclose(your_result, true_result)
    print_result(correct)
