# Supplementary material
Source: ML conference proceedings conference paper supplement (https://proceedings.mlr.press/v139/araki21a.html)
Supplement: Supplementary file 1 [file araki21a-supp.zip › supp/pick-and-place domain code/lof/libs/spinningup/spinup/utils/mpi_pytorch.py]

import multiprocessing
import numpy as np
import os
import torch
from mpi4py import MPI
from spinup.utils.mpi_tools import broadcast, mpi_avg, num_procs, proc_id

def setup_pytorch_for_mpi():
    """
    Avoid slowdowns caused by each separate process's PyTorch using
    more than its fair share of CPU resources.
    """
    #print('Proc %d: Reporting original number of Torch threads as %d.'%(proc_id(), torch.get_num_threads()), flush=True)
    if torch.get_num_threads()==1:
        return
    fair_num_threads = max(int(torch.get_num_threads() / num_procs()), 1)
    torch.set_num_threads(fair_num_threads)
    #print('Proc %d: Reporting new number of Torch threads as %d.'%(proc_id(), torch.get_num_threads()), flush=True)

def mpi_avg_grads(module):
    """ Average contents of gradient buffers across MPI processes. """
    if num_procs()==1:
        return
    for p in module.parameters():
        p_grad_numpy = p.grad.numpy()   # numpy view of tensor data
        avg_p_grad = mpi_avg(p.grad)
        p_grad_numpy[:] = avg_p_grad[:]

def sync_params(module):
    """ Sync all parameters of module across all MPI processes. """
    if num_procs()==1:
        return
    for p in module.parameters():
        p_numpy = p.data.numpy()
        broadcast(p_numpy)
