# Supplementary material
Source: ML conference proceedings conference paper supplement (https://proceedings.mlr.press/v139/araki21a.html)
Supplement: Supplementary file 1 [file araki21a-supp.zip › supp/pick-and-place domain code/lof/libs/spinningup/spinup/utils/run_entrypoint.py]

import zlib
import pickle
import base64

if __name__ == '__main__':
    import argparse
    parser = argparse.ArgumentParser()
    parser.add_argument('encoded_thunk')
    args = parser.parse_args()
    thunk = pickle.loads(zlib.decompress(base64.b64decode(args.encoded_thunk)))
    thunk()
