# Supplementary material
Source: ML conference proceedings conference paper supplement (https://proceedings.mlr.press/v139/araki21a.html)
Supplement: Supplementary file 1 [file araki21a-supp.zip › supp/pick-and-place domain code/lof/libs/spinningup/spinup/version.py]

version_info = (0, 2, 0)
# format:
# ('spinup_major', 'spinup_minor', 'spinup_patch')

def get_version():
    "Returns the version as a human-format string."
    return '%d.%d.%d' % version_info

__version__ = get_version()
