# Supplementary material
Source: ML conference proceedings conference paper supplement (https://proceedings.mlr.press/v139/araki21a.html)
Supplement: Supplementary file 1 [file araki21a-supp.zip › supp/pick-and-place domain code/lof/libs/spinningup/test/test_ppo.py]

#!/usr/bin/env python

import unittest
from functools import partial

import gym
import tensorflow as tf

from spinup import ppo_tf1 as ppo


class TestPPO(unittest.TestCase):
    def test_cartpole(self):
        ''' Test training a small agent in a simple environment '''
        env_fn = partial(gym.make, 'CartPole-v1')
        ac_kwargs = dict(hidden_sizes=(32,))
        with tf.Graph().as_default():
            ppo(env_fn, steps_per_epoch=100, epochs=10, ac_kwargs=ac_kwargs)
        # TODO: ensure policy has got better at the task


if __name__ == '__main__':
    unittest.main()
