# Supplementary material
Source: ML conference proceedings conference paper supplement (https://proceedings.mlr.press/v139/araki21a.html)
Supplement: Supplementary file 1 [file araki21a-supp.zip › supp/pick-and-place domain code/lof/src/rollout.py]

from robot_env import RobotEnv
import os
import torch
import gym
import time 


##########
# Option #
##########
class Option(object):
    def __init__(self, load_path:str):
        self.ac = torch.load(load_path)
        print(self.ac)
        print(type(self.ac))
        
    def get_action(self, state: torch.Tensor):
        a = self.ac.pi.mu_net(state).detach().numpy()
        #a = self.ac.act(state)
        #a,_,_ = self.ac.step(state)
        return a

    def get_value(self, state: torch.Tensor):
        return self.ac.v(state)

    def is_terminated(self, state):
        return False

    def environment_info(self):
        pass

        
###############
# Load Option #
###############

option_load_path = os.path.join(os.environ['PKG_PATH'], 'experiments', 'ppo', 'pyt_save', 'model7500.pt')
option = Option(option_load_path)

#################
# Construct Env #
#################
render_camera = False
env = RobotEnv(headless=False, render_camera=render_camera)

###############
# Run Rollout #
###############
def run_rollout(policy, env, num_episodes):
    for i in range(num_episodes):
        task_done = False
        R = 0
        obs = env.reset()
        while not task_done:
            a = policy.get_action(torch.from_numpy(obs).float())
            obs, reward, task_done, _ = env.step(a)
            R += reward
            if render_camera:
                env.render()
        print(f"Episode {i} return: {R}")

    env.shutdown()


run_rollout(option, env, 10)
