# Supplementary material
Source: ML conference proceedings conference paper supplement (https://proceedings.mlr.press/v139/araki21a.html)
Supplement: Supplementary file 1 [file araki21a-supp.zip › supp/reacher domain code/lof/baselines/rm/options/blue.txt]

0 # initial state
(0,0,'!b',ConstantRewardFunction(0))
(0,1,'b',ConstantRewardFunction(1))
(1,1,'True',ConstantRewardFunction(0))
