# Supplementary material
Source: ML conference proceedings conference paper supplement (https://proceedings.mlr.press/v139/araki21a.html)
Supplement: Supplementary file 1 [file araki21a-supp.zip › supp/reacher domain code/lof/baselines/rm/tasks/IF.txt]

0 # initial state
(0,0,'!r&!b&!c',ConstantRewardFunction(0))
(0,1,'r&!c',ConstantRewardFunction(0))
(0,3,'b|c&!r',ConstantRewardFunction(0))
(0,4,'c&r',ConstantRewardFunction(1))
(1,1,'!c&!b',ConstantRewardFunction(0))
(1,2,'b&!c',ConstantRewardFunction(0))
(1,4,'c',ConstantRewardFunction(1))
(2,2,'!r&!c',ConstantRewardFunction(0))
(2,4,'r|c',ConstantRewardFunction(1))
(3,3,'!r',ConstantRewardFunction(0))
(3,4,'r',ConstantRewardFunction(1))
(4,4,'True',ConstantRewardFunction(0))
