# Supplementary material
Source: ML conference proceedings conference paper supplement (https://proceedings.mlr.press/v139/araki21a.html)
Supplement: Supplementary file 1 [file araki21a-supp.zip › supp/reacher domain code/lof/baselines/rm/tasks/task1.txt]

1 # initial state
(0,0,'!r&!g',ConstantRewardFunction(0))
(0,1,'r|g',ConstantRewardFunction(0))
(1,1,'!b',ConstantRewardFunction(0))
(1,2,'b',ConstantRewardFunction(0))
(2,2,'!y',ConstantRewardFunction(0))
(2,3,'y',ConstantRewardFunction(1))
(3,3,'True',ConstantRewardFunction(0))
