# Supplementary material
Source: ML conference proceedings conference paper supplement (https://proceedings.mlr.press/v139/araki21a.html)
Supplement: Supplementary file 1 [file araki21a-supp.zip › supp/reacher domain code/lof/experiments/red/progress.txt]

Epoch	AverageEpRet	StdEpRet	MaxEpRet	MinEpRet	EpLen	AverageVVals	StdVVals	MaxVVals	MinVVals	TotalEnvInteracts	LossPi	LossV	DeltaLossPi	DeltaLossV	Entropy	KL	ClipFrac	StopIter	Time
0	-55.891266	7.7140408	-37.443157	-76.68656	50.0	0.036261886	0.07753787	0.2775886	-0.2514397	4000	3.3378602e-09	823.1265	-0.0059740352	-530.26154	0.918941	0.00022160434	0.072	79.0	3.2768056392669678
1	-52.937183	6.8882985	-38.833584	-67.196365	50.0	-13.0985	3.1927733	5.360004	-16.531172	8000	1.1920929e-08	245.44334	-0.008118895	-136.96686	0.9117927	0.0021963252	0.1025	79.0	6.667434453964233
2	-51.92207	6.8754907	-39.84762	-71.10115	50.0	-19.813477	5.366552	1.4049673	-24.983494	12000	-5.2452087e-09	101.16282	-0.0067141983	-30.991127	0.9046402	0.0013370393	0.074	79.0	12.118674516677856
3	-51.185596	6.5172954	-38.31103	-70.9737	50.0	-21.08927	7.786415	-4.163586	-29.48414	16000	1.8119811e-08	78.063	-0.008014477	-15.780384	0.89795655	0.0043316227	0.09825	79.0	15.854987859725952
4	-50.165245	6.42091	-35.932972	-64.98458	50.0	-22.135303	8.2976885	-4.7676907	-31.836239	20000	-1.3828277e-08	80.61788	-0.008403894	-18.080147	0.88950926	0.0039876294	0.1175	79.0	18.648119688034058
5	-48.44103	5.9996014	-37.75084	-64.091034	50.0	-23.689941	8.079609	-3.4056957	-32.964203	24000	-1.1444092e-08	72.05157	-0.007826303	-20.360249	0.8822408	0.004152147	0.08725	79.0	21.47849726676941
6	-47.693623	5.924176	-35.941986	-66.07508	50.0	-20.094671	9.366174	-1.0417888	-33.382545	28000	1.07288365e-08	50.396317	-0.007840759	-9.257797	0.8730964	0.0013356472	0.0865	79.0	24.47656273841858
7	-45.93035	5.726019	-33.302643	-60.481148	50.0	-21.230589	8.791491	-1.0815034	-33.73816	32000	5.722046e-09	53.601746	-0.0077614044	-12.784737	0.865423	0.0032123744	0.09425	79.0	27.647732496261597
8	-44.008297	6.3813252	-31.533335	-65.42881	50.0	-21.429636	8.403919	-1.2132324	-33.855797	36000	-4.7683715e-09	55.68522	-0.0074526505	-10.413273	0.856552	0.0002993629	0.08125	79.0	31.006437063217163
9	-42.541462	5.3143353	-29.866497	-56.562054	50.0	-19.355745	8.342818	0.07386725	-33.475906	40000	-7.1525574e-10	50.47256	-0.007648425	-5.697006	0.84552526	0.0011562168	0.0865	79.0	34.17169499397278
10	-42.600807	4.994443	-30.880062	-54.516212	50.0	-17.787493	7.7328615	-1.6451724	-32.805485	44000	-6.0796737e-09	42.46089	-0.00723293	-6.742298	0.83570683	0.0023293123	0.0755	79.0	37.72076940536499
11	-42.61466	5.6493535	-30.520075	-57.186092	50.0	-20.351974	7.8548536	3.4431677	-32.952927	48000	-6.198883e-09	65.1437	-0.008873947	-11.597153	0.82779175	0.0030325127	0.09575	79.0	41.25394678115845
12	-41.504753	5.6909094	-28.808033	-55.10618	50.0	-17.807943	7.5471478	0.8956366	-32.030895	52000	1.9073487e-09	56.490925	-0.008788893	-12.751232	0.8185114	0.002445787	0.09475	79.0	44.675167083740234
13	-40.920418	4.8658853	-28.617207	-52.964016	50.0	-18.064972	7.317336	-3.326878	-32.21114	56000	-8.5830685e-09	45.395344	-0.007994717	-6.7370377	0.8112566	0.0022769803	0.07425	79.0	48.0177206993103
14	-39.859077	5.4045067	-27.72418	-54.179836	50.0	-18.266903	6.841682	-3.9857402	-31.933039	60000	8.5830685e-09	49.58055	-0.0071745985	-6.309273	0.80204517	0.001955324	0.0665	79.0	52.438613176345825
15	-38.861076	4.9132266	-28.909052	-54.98822	50.0	-17.344555	7.2256126	-1.8249526	-31.411203	64000	8.34465e-09	41.813164	-0.00710112	-5.2125015	0.79379845	0.0033087176	0.0785	79.0	56.87573599815369
16	-38.360283	4.395522	-28.839472	-46.340458	50.0	-17.302015	7.10057	-2.762681	-30.88561	68000	-1.1920929e-08	43.424576	-0.008489962	-6.3864136	0.7852712	0.0016674981	0.09225	79.0	60.9102041721344
17	-38.365467	4.8922853	-28.642262	-51.70304	50.0	-16.612547	6.5825686	-2.1007514	-29.864643	72000	-1.66893e-08	41.84325	-0.008253534	-7.8613815	0.7773991	0.0018257112	0.07275	79.0	65.45310974121094
18	-38.671833	4.527121	-24.359118	-48.35389	50.0	-16.174932	6.663129	1.1001465	-30.914091	76000	-4.529953e-09	41.28943	-0.0078070015	-8.062927	0.76890576	0.0029604288	0.07875	79.0	68.93026471138
19	-36.635902	4.1919584	-28.268438	-47.744614	50.0	-17.354967	6.885884	-1.3856941	-30.734085	80000	9.536744e-10	41.51471	-0.007039171	-8.144417	0.7618767	0.0026472763	0.0715	79.0	72.47875261306763
20	-36.0075	4.3255715	-24.775864	-51.769222	50.0	-15.927197	6.321441	-0.636924	-30.194614	84000	-6.6757204e-09	38.313225	-0.007545842	-6.40942	0.7541883	0.0013379175	0.08	79.0	75.97225332260132
21	-36.199963	4.5005794	-26.33433	-48.051357	50.0	-15.482358	6.4874907	-1.0327724	-29.407946	88000	6.6757204e-09	36.48067	-0.0073778657	-5.678686	0.7462543	0.0023239977	0.0725	79.0	79.56235694885254
22	-36.678474	4.462853	-26.727184	-45.729248	50.0	-15.6139765	6.3866568	1.7351267	-29.862667	92000	2.6226044e-09	39.40825	-0.007461498	-6.951721	0.7380852	0.0016036032	0.069	79.0	83.05433630943298
23	-35.088936	4.0034847	-24.97359	-44.557674	50.0	-16.124788	6.488524	-2.0002549	-30.65214	96000	3.9339065e-09	32.83007	-0.008012544	-5.652624	0.72867787	0.0014696498	0.087	79.0	87.19757509231567
24	-34.71932	4.1186466	-24.59949	-43.975994	50.0	-15.841929	6.1383395	-1.347816	-30.098436	100000	-9.775162e-09	35.921764	-0.0071832547	-7.8370457	0.72039515	0.0014363292	0.08925	79.0	90.75313377380371
25	-34.22575	3.922986	-25.827145	-43.708225	50.0	-15.213968	6.1529126	-2.2283733	-28.87994	104000	3.8146974e-09	34.624916	-0.00883131	-7.9476585	0.7128325	0.0001774544	0.091	79.0	94.29301190376282
26	-34.379173	3.8264468	-27.172056	-46.503483	50.0	-14.247186	5.962848	-1.1964779	-28.104269	108000	2.861023e-09	33.81165	-0.0069011184	-7.44277	0.7056023	0.0014082392	0.07675	79.0	97.83697819709778
27	-33.22729	3.746128	-22.240992	-42.075897	50.0	-15.367078	6.1700253	0.4750937	-29.49097	112000	-5.2452087e-09	32.481743	-0.0080382	-7.406988	0.69904613	0.002268905	0.083	79.0	101.42696905136108
28	-34.635456	4.389079	-25.178072	-45.8801	50.0	-14.462539	5.989346	-1.179005	-27.14569	116000	1.8954276e-08	35.477	-0.008564535	-7.0302963	0.69349676	0.0044698706	0.0835	79.0	104.88099813461304
29	-32.536106	3.9843476	-23.943266	-40.057083	50.0	-14.9658165	6.1826754	-1.5755196	-28.03386	120000	-5.4836273e-09	31.772987	-0.0072739925	-7.8968544	0.6839553	0.0016551802	0.07825	79.0	108.4921875
30	-32.218864	3.7731042	-22.789177	-41.362144	50.0	-14.289309	5.7304907	-0.321125	-26.521574	124000	1.001358e-08	29.418678	-0.007857936	-7.128937	0.67622906	0.0011475021	0.09525	79.0	112.03548240661621
31	-31.992218	4.02166	-23.116848	-43.60942	50.0	-14.107993	5.661993	-1.3172637	-26.059252	128000	9.417534e-09	26.560648	-0.0067722863	-4.410591	0.67100567	0.0013657478	0.07325	79.0	115.36879396438599
32	-32.47503	4.254675	-21.425995	-39.900574	50.0	-13.31215	5.790384	3.1743586	-26.802837	132000	-3.3378602e-09	35.036667	-0.008747545	-7.123087	0.6637805	0.0025587797	0.09775	79.0	118.594890832901
33	-30.957577	4.1489954	-23.132847	-40.890923	50.0	-14.670801	5.677154	1.197012	-26.729013	136000	4.2915342e-09	34.736393	-0.008263855	-11.915821	0.6568273	0.003963073	0.093	79.0	123.5212790966034
34	-30.603664	3.9071019	-22.08486	-38.82241	50.0	-13.418414	5.3855877	0.68332255	-25.691254	140000	4.768372e-10	30.856691	-0.007477182	-7.3790646	0.65026206	0.0021616977	0.09425	79.0	127.3849229812622
35	-30.421642	4.047945	-21.878063	-39.7791	50.0	-13.170057	5.0970535	-0.07793693	-24.963263	144000	0.0	30.641039	-0.008197828	-8.451027	0.6441387	0.0017927533	0.08425	79.0	130.4521131515503
36	-30.465118	3.606349	-20.55857	-38.86923	50.0	-13.038783	5.31325	0.86651635	-26.361286	148000	1.2159347e-08	31.19558	-0.010542369	-7.9751396	0.6354272	0.0024266576	0.10575	79.0	133.67773175239563
37	-29.397543	3.1882482	-20.089226	-39.315006	50.0	-13.574341	5.0829873	-1.633281	-25.741655	152000	1.9788741e-08	28.498718	-0.007995996	-8.172218	0.6276786	0.0029398843	0.08275	79.0	136.71958351135254
38	-29.424557	3.5196502	-22.063095	-40.583523	50.0	-12.57283	4.854432	-0.13289085	-24.456646	156000	-6.9141386e-09	26.68801	-0.008150913	-6.341528	0.61964494	0.0018453617	0.09025	79.0	139.51307225227356
39	-29.032684	3.679616	-20.99014	-39.56715	50.0	-12.607043	5.1085215	-1.403458	-24.568628	160000	-1.001358e-08	29.726553	-0.007997784	-8.718357	0.61389905	0.0040355143	0.081	79.0	142.27623534202576
40	-29.331936	3.5339596	-22.023296	-40.955933	50.0	-12.205243	4.835957	0.16293475	-24.745123	164000	7.867813e-09	29.659897	-0.008483731	-8.275307	0.60703593	0.0013707252	0.09625	79.0	145.10546493530273
41	-28.711102	3.5817456	-20.580345	-36.40634	50.0	-12.898333	4.6489086	-1.3719847	-25.283102	168000	1.2397766e-08	24.697107	-0.00910305	-7.6812267	0.6013899	0.0014240002	0.0975	79.0	148.0270323753357
42	-28.473404	3.381937	-20.456968	-34.76644	50.0	-12.645442	5.1330175	2.540473	-25.441408	172000	-7.152557e-09	25.05657	-0.0075340383	-8.073299	0.5933335	0.002747578	0.07475	79.0	150.84252667427063
43	-28.067413	3.5650845	-20.187048	-38.44988	50.0	-12.0044985	5.0021763	-0.33751234	-23.727446	176000	-3.5762786e-09	24.192223	-0.008027345	-6.968439	0.5861616	0.002909529	0.08925	79.0	153.68425726890564
44	-27.616022	3.61971	-18.587236	-36.71984	50.0	-12.2137165	5.0166597	0.6633817	-23.39525	180000	-8.5830685e-09	24.089113	-0.007932228	-5.755516	0.5784402	0.0031122838	0.077	79.0	156.4819552898407
45	-27.059856	3.5190806	-18.465166	-34.558407	50.0	-11.750045	4.9411206	-1.159744	-23.401678	184000	1.001358e-08	19.083832	-0.008703777	-4.5733604	0.57029057	0.0012018661	0.0825	79.0	159.2866313457489
46	-27.413242	2.82433	-20.712158	-33.336063	50.0	-11.880652	5.0063457	-2.1436915	-22.553347	188000	1.4305114e-08	21.447283	-0.008643211	-6.438383	0.56151444	0.0019613162	0.09475	79.0	162.16308689117432
47	-27.16391	3.3463464	-18.83837	-35.8771	50.0	-11.777685	4.731791	-0.79256666	-22.927755	192000	1.6689301e-09	22.745857	-0.008011059	-6.8442736	0.55331933	0.0027671994	0.0745	79.0	165.1990029811859
48	-26.15224	3.3120296	-18.49119	-33.664753	50.0	-12.245266	4.800979	-1.1107793	-23.63885	196000	7.7486035e-09	21.541035	-0.00940465	-8.030371	0.54443693	0.0016778137	0.0835	79.0	168.27894020080566
49	-26.103771	3.2537715	-18.81006	-34.328354	50.0	-10.987354	5.0890384	0.37043393	-22.921143	200000	1.6570091e-08	20.210207	-0.008044457	-6.3980284	0.5354358	0.003989768	0.07975	79.0	171.07140350341797
50	-25.728771	3.5739794	-17.855806	-33.666454	50.0	-11.200203	4.84725	-0.27753174	-22.917643	204000	8.106232e-09	21.156757	-0.009161209	-7.106701	0.52762145	0.002839438	0.08675	79.0	174.01821112632751
51	-25.446138	3.7335005	-17.211355	-33.3863	50.0	-11.440341	4.420666	-1.047479	-22.808159	208000	1.4066696e-08	20.695118	-0.0076741967	-6.9494467	0.51938707	0.0008276113	0.075	79.0	176.88084506988525
52	-25.83883	2.7105553	-19.610771	-32.559227	50.0	-10.799094	4.430645	-0.8380756	-24.28693	212000	-1.1920929e-08	18.532063	-0.00792317	-5.636978	0.5112808	0.0027905994	0.08975	79.0	179.8801784515381
53	-25.647736	2.5465293	-19.441912	-31.105556	50.0	-11.108932	4.8400626	-0.11684932	-24.2235	216000	0.0	15.349632	-0.008280659	-4.6518726	0.50536674	0.0018185645	0.1015	79.0	182.71681022644043
54	-25.012974	3.07281	-16.656088	-33.53188	50.0	-11.182699	4.653242	-1.8580403	-21.987293	220000	-1.4305115e-09	18.090458	-0.009249035	-6.2471066	0.5013204	0.0019739685	0.1175	79.0	185.65638732910156
55	-24.604118	3.2992182	-17.088484	-32.23079	50.0	-10.8101635	4.736429	0.18638304	-22.088507	224000	-1.3113022e-08	18.655928	-0.007887372	-7.0795984	0.4932163	0.000671801	0.07475	79.0	188.48234748840332
56	-24.633732	2.9624946	-16.661572	-32.188145	50.0	-10.765282	4.43917	-0.727508	-21.567575	228000	-1.9073487e-09	15.308394	-0.009552272	-5.5934095	0.48496252	0.0031643542	0.102	79.0	191.26922130584717
57	-23.881552	3.1658003	-16.765326	-32.00935	50.0	-10.416472	4.6788077	-0.31575397	-21.787682	232000	-3.3378602e-09	15.627103	-0.008425716	-5.0376406	0.47753882	0.0026625	0.0845	79.0	194.12791180610657
58	-23.90297	2.8222017	-17.968386	-31.466906	50.0	-9.954051	4.49914	0.8531915	-21.441319	236000	-1.4305114e-08	16.949501	-0.0076544913	-6.133271	0.4686129	0.0022214595	0.089	79.0	196.8401494026184
59	-23.858282	2.9961596	-17.33802	-31.429087	50.0	-10.68099	4.262494	-2.5009332	-21.678936	240000	-1.0251999e-08	17.28991	-0.007912602	-5.482008	0.46241018	0.0018975949	0.08	79.0	199.55605816841125
60	-23.070179	3.1734083	-16.806965	-31.05767	50.0	-10.263225	4.430844	1.1474818	-20.595047	244000	8.5830685e-09	15.008977	-0.0081166085	-4.969283	0.45374277	0.004133996	0.10175	79.0	202.27456307411194
61	-23.480536	2.7904828	-17.70494	-33.15154	50.0	-9.716264	4.464827	-0.48736694	-20.136642	248000	1.0967255e-08	15.340862	-0.008852371	-5.7685156	0.44846645	0.0028323007	0.096	79.0	205.01900672912598
62	-23.458853	2.611129	-17.212545	-30.129713	50.0	-10.446568	4.1526976	-0.91864395	-20.444006	252000	4.768372e-10	15.480705	-0.007939433	-5.7230387	0.44093788	0.0025358796	0.083	79.0	207.85364198684692
63	-23.584455	2.9540324	-17.878666	-29.920938	50.0	-10.055733	4.544508	3.404714	-21.089247	256000	1.692772e-08	13.031229	-0.009711495	-4.375819	0.43317387	0.0037825012	0.1035	79.0	210.59475350379944
64	-22.585512	2.517016	-17.737158	-28.484266	50.0	-10.081854	4.466655	0.0684042	-20.763382	260000	-9.059906e-09	12.241938	-0.008791166	-3.996664	0.42395124	0.0025562663	0.111	79.0	213.3820517063141
65	-22.006702	2.857262	-15.75549	-27.79431	50.0	-9.616932	4.23204	-0.83431375	-20.547167	264000	-7.152557e-09	12.661933	-0.008294943	-4.6974025	0.41860977	0.0026084594	0.096	79.0	216.61199736595154
66	-22.81942	2.960706	-16.69088	-31.729937	50.0	-9.411918	4.0552783	-2.05651	-19.866886	268000	-8.106232e-09	13.888833	-0.00872854	-4.1077585	0.41104358	0.0016311334	0.09075	79.0	220.02914905548096
67	-22.008663	2.8223069	-15.46864	-28.053015	50.0	-9.580657	4.362786	2.9073822	-21.27833	272000	-7.1525574e-10	12.855043	-0.00805132	-4.9113317	0.40388146	0.0031520599	0.09275	79.0	223.3045151233673
68	-21.69369	2.877847	-15.865764	-31.850067	50.0	-9.141947	3.9948509	-0.747228	-20.076181	276000	-5.2452087e-09	12.525705	-0.009084183	-4.8999786	0.3971624	0.0013765554	0.12075	79.0	226.5282735824585
69	-21.554893	2.8407364	-13.996134	-28.088366	50.0	-9.422629	4.2504435	0.23843016	-19.47617	280000	-2.3841857e-09	12.807908	-0.008068031	-4.9849467	0.38856375	0.0034326913	0.097	79.0	229.79264974594116
70	-21.635494	2.6793244	-15.605432	-29.048405	50.0	-9.135235	3.963637	0.6211339	-19.623096	284000	2.193451e-08	12.879849	-0.009027536	-6.1724076	0.38288128	0.0023319926	0.09325	79.0	239.54526805877686
71	-21.066494	2.6042697	-15.717452	-26.85282	50.0	-9.388741	3.996825	1.3251891	-20.052511	288000	2.2649765e-08	12.31648	-0.0071790465	-4.8035355	0.37376904	0.0015704342	0.07525	79.0	244.0202190876007
72	-21.251577	2.7251017	-14.4137745	-29.132975	50.0	-8.842255	3.9777946	0.31871694	-18.415144	292000	-1.4066696e-08	13.341752	-0.009339671	-5.957662	0.36751947	0.0035245225	0.10425	79.0	247.68436527252197
73	-20.59696	2.7521515	-15.75092	-28.019331	50.0	-8.9564	3.9529629	0.8236746	-18.737617	296000	-3.5762786e-09	11.619689	-0.0070185415	-4.0497637	0.35991192	0.0014976009	0.077	79.0	253.01172804832458
74	-20.321022	2.9836295	-13.80098	-27.523983	50.0	-8.92843	3.9164615	3.2922962	-18.417274	300000	2.861023e-09	10.813436	-0.007992848	-4.114359	0.35289356	0.0026212672	0.0845	79.0	256.5028917789459
75	-20.52765	2.4469786	-13.317204	-27.159147	50.0	-8.709204	3.7110248	-0.8017061	-19.934727	304000	2.861023e-09	12.06846	-0.007351425	-5.052609	0.3450677	0.0028196883	0.09125	79.0	260.0328698158264
76	-20.434278	2.671655	-14.645472	-26.120214	50.0	-8.836296	3.995224	2.893819	-20.227392	308000	1.45435335e-08	10.306044	-0.007767848	-4.103762	0.33848828	0.0032399867	0.0925	79.0	263.36196088790894
77	-19.896109	2.8219721	-14.442651	-29.232738	50.0	-8.297523	3.9943514	0.89272666	-19.179806	312000	5.6028364e-09	10.950436	-0.008773916	-4.7864723	0.33261615	0.0025181514	0.10275	79.0	267.1084077358246
78	-19.21138	2.7075312	-12.847764	-25.74964	50.0	-8.612867	3.7977524	2.069864	-20.017971	316000	8.225441e-09	10.127463	-0.007213117	-4.7874975	0.32534814	0.003100979	0.078	79.0	270.3354139328003
79	-19.33926	2.86529	-12.559569	-25.264793	50.0	-8.043928	3.6799664	1.6725535	-17.937525	320000	-1.6689301e-09	9.105394	-0.0069752447	-3.7908182	0.31831646	0.0016189947	0.07925	79.0	273.9493029117584
80	-19.447065	2.544604	-13.565567	-26.622156	50.0	-7.92995	3.946205	0.12958536	-18.376087	324000	2.9206275e-09	9.512004	-0.008129829	-4.280931	0.31124455	9.9210054e-05	0.09775	79.0	277.54090094566345
81	-19.111311	2.322125	-13.847646	-23.329264	50.0	-8.538818	3.6938484	-0.44262555	-17.815277	328000	1.6689301e-09	8.315309	-0.008283159	-4.035204	0.3027344	0.0017724783	0.087	79.0	281.09384512901306
82	-19.15422	2.2783856	-13.35205	-24.81033	50.0	-8.244318	3.669222	0.9065848	-17.648832	332000	-6.3180923e-09	8.854661	-0.009355327	-3.8498702	0.29573816	0.0013639398	0.11175	79.0	284.6341404914856
83	-19.18458	2.774275	-11.99083	-26.653551	50.0	-8.290188	3.9407883	0.43663824	-18.877085	336000	0.0	8.4516735	-0.008592602	-3.8947635	0.28763276	0.0033361914	0.1065	79.0	288.2295198440552
84	-19.309437	2.806113	-13.285686	-29.371756	50.0	-8.113839	3.6203985	-0.5615544	-17.419184	340000	1.525879e-08	8.97092	-0.008689018	-4.179989	0.28178018	0.0021697027	0.10875	79.0	291.58350682258606
85	-18.54634	2.7203004	-12.262481	-25.21473	50.0	-8.102811	3.7139087	1.3972529	-18.404047	344000	3.9339065e-09	8.509928	-0.008624994	-4.0212784	0.27472472	0.002869453	0.10025	79.0	294.5841417312622
86	-18.664053	2.305298	-13.779715	-24.476217	50.0	-7.685736	3.8258216	2.3453166	-17.640308	348000	-9.536744e-10	7.700569	-0.0085917385	-3.737902	0.26702794	0.001772544	0.1085	79.0	297.55672001838684
87	-18.34867	2.978009	-12.655412	-26.24228	50.0	-8.04351	3.4867427	1.7513894	-17.884825	352000	1.7404556e-08	9.270361	-0.0083306795	-4.5342836	0.25955167	0.0019420892	0.0915	79.0	300.8303952217102
88	-17.832346	2.631768	-12.344476	-24.317825	50.0	-7.665788	3.8277447	1.1433326	-17.458574	356000	-1.4305115e-09	8.467347	-0.009412014	-4.46951	0.25225076	0.0014987602	0.092	79.0	304.5154469013214
89	-17.990807	2.6494741	-11.951966	-26.34607	50.0	-7.4901347	3.6110249	0.92737055	-17.188875	360000	-5.4836273e-09	8.003853	-0.008479165	-4.153865	0.24521396	0.003815847	0.101	79.0	307.9684410095215
90	-17.835548	2.483444	-12.423599	-23.016634	50.0	-7.462703	3.5655622	2.9942656	-16.20992	364000	2.1457671e-09	8.07697	-0.009355384	-4.166476	0.23932265	0.00316652	0.1035	79.0	311.3026235103607
91	-17.834375	2.5770683	-12.589082	-23.958197	50.0	-7.5496016	3.535778	2.5097888	-16.902258	368000	3.3378602e-09	9.031691	-0.008385488	-4.4365273	0.23164178	0.003023711	0.092	79.0	314.71963453292847
92	-16.959385	2.7464545	-11.207454	-22.662502	50.0	-7.6379094	3.4651377	0.7535521	-16.860693	372000	-8.8214875e-09	8.0761595	-0.008148643	-4.1909637	0.22258556	0.00129008	0.09025	79.0	317.96894359588623
93	-17.851498	2.1415884	-12.528657	-21.553818	50.0	-7.5177264	3.523261	3.131923	-16.317118	376000	1.7642975e-08	6.584318	-0.0077263713	-3.1412537	0.21405175	0.003649497	0.0985	79.0	325.02528190612793
94	-16.959057	2.3215375	-11.936009	-22.189686	50.0	-7.462586	3.2981074	-0.42175865	-16.85413	380000	-1.0967255e-08	6.1907644	-0.007554102	-2.8117821	0.20666116	0.000882003	0.1	79.0	330.7553479671478
95	-17.07319	2.4613426	-11.248549	-22.451277	50.0	-7.121439	3.3842096	3.5806522	-15.847851	384000	7.629395e-09	6.3272724	-0.00871312	-2.8823304	0.20203179	0.002385936	0.1	79.0	334.4397737979889
96	-16.79833	2.4622483	-10.462903	-21.915731	50.0	-7.2804475	3.398042	0.56174946	-16.076565	388000	5.9604643e-10	6.517206	-0.008095292	-3.1410134	0.19488147	0.0019212593	0.09225	79.0	337.63619112968445
97	-16.360113	2.2213452	-11.996984	-20.743713	50.0	-6.7601404	3.2739775	0.8133737	-15.534637	392000	-1.9073486e-08	6.720587	-0.008150527	-3.4754245	0.1864801	0.002236932	0.08925	79.0	340.82996010780334
98	-16.16756	2.3826861	-9.881549	-22.200615	50.0	-7.0689898	3.2797246	1.1538272	-14.643303	396000	-2.3841857e-09	5.688645	-0.00919889	-2.8597353	0.17865744	0.0030927951	0.12075	79.0	344.57729506492615
99	-16.66463	2.351008	-11.400621	-21.470058	50.0	-6.9339814	3.3688715	2.0191174	-15.820052	400000	1.2159347e-08	7.027038	-0.008758752	-3.8718731	0.16994217	0.0028817202	0.09575	79.0	347.9927008152008
100	-15.932457	2.5123544	-10.775676	-22.348585	50.0	-6.8762465	3.2614768	1.7482159	-15.644652	404000	-1.990795e-08	6.433978	-0.0075296317	-3.45663	0.15960199	0.0030140316	0.07425	79.0	351.30189514160156
101	-15.920878	2.438101	-10.9990225	-21.277405	50.0	-6.841277	3.1477702	1.3081291	-16.377914	408000	-7.7486035e-09	6.110404	-0.008347775	-2.8979237	0.15415804	0.003266287	0.09875	79.0	354.6004614830017
102	-15.504004	3.0670168	-8.45003	-22.05952	50.0	-6.5545535	3.1045778	0.6162348	-15.548107	412000	4.768372e-10	5.198419	-0.0073057967	-2.5399656	0.14758496	0.0026459869	0.1	79.0	357.98737597465515
103	-15.663152	2.3962681	-10.4423275	-22.486984	50.0	-6.603949	3.24828	3.654512	-15.666389	416000	-5.4836273e-09	5.590745	-0.008754284	-2.8692615	0.14097144	0.00327048	0.08625	79.0	361.5110111236572
104	-15.345858	2.7603	-9.166221	-23.053993	50.0	-6.384603	3.1613083	0.6983231	-15.0627365	420000	-9.536743e-09	4.9028172	-0.0077584875	-2.697319	0.13138561	0.0013190791	0.1025	79.0	365.37782049179077
105	-14.74328	2.5140643	-9.34164	-20.756786	50.0	-6.602114	3.3353677	1.9722952	-16.400463	424000	6.437302e-09	6.349261	-0.008747886	-3.497103	0.12442685	0.0026062112	0.10525	79.0	368.9003641605377
106	-14.4283495	2.471909	-9.165917	-20.295525	50.0	-6.488166	3.0415344	1.3002836	-15.057423	428000	-4.053116e-09	4.8704305	-0.009006754	-2.601846	0.11645361	0.0013441029	0.10325	79.0	372.59601187705994
107	-14.281485	2.0847514	-9.322401	-21.43533	50.0	-5.8908315	2.9218938	2.2019808	-14.603822	432000	-5.2452087e-09	4.8257246	-0.008288103	-2.406619	0.10666343	0.0008706907	0.091	79.0	376.23508501052856
108	-14.2545395	2.4805813	-7.673223	-18.885336	50.0	-6.069995	2.87039	1.1442093	-14.8991	436000	-8.8214875e-09	5.355871	-0.0074554468	-3.2198172	0.09854532	0.0021450575	0.10425	79.0	379.87808179855347
109	-14.372357	2.2379832	-9.76942	-19.211994	50.0	-5.801997	2.9108546	1.0407404	-13.837377	440000	-1.3351441e-08	5.9967766	-0.009417831	-3.857759	0.093832396	0.0024896155	0.10125	79.0	383.4994592666626
110	-14.230829	2.3607059	-9.416708	-20.16488	50.0	-6.163461	2.9254348	0.17210591	-14.422872	444000	-8.5830685e-09	4.951756	-0.008229295	-2.4840057	0.08615503	0.0013619444	0.1135	79.0	387.0609405040741
111	-13.735479	2.535863	-8.425655	-18.627474	50.0	-5.7775917	2.9361994	1.3185139	-13.965939	448000	-1.4305115e-09	4.2903557	-0.008020262	-2.4398694	0.07791216	0.0036310963	0.09075	79.0	390.68830943107605
112	-13.993144	2.504289	-9.188933	-20.963083	50.0	-5.9474416	3.0623338	1.9187453	-13.798267	452000	-1.5854836e-08	3.883098	-0.0076149683	-2.100442	0.070922844	0.0019123581	0.078	79.0	394.3845639228821
113	-14.020172	2.3657897	-9.451959	-20.967878	50.0	-5.896329	3.0225677	1.5336255	-14.835265	456000	7.152557e-09	4.304437	-0.00857	-2.3900251	0.06327808	0.0021001988	0.0985	79.0	398.16189646720886
114	-13.723459	2.3845801	-9.057307	-19.131893	50.0	-5.719296	2.844623	0.54758215	-14.165112	460000	6.198883e-09	4.125908	-0.008473103	-1.9826953	0.053907946	0.0024716055	0.0985	79.0	401.83104395866394
115	-13.397474	2.335907	-8.497134	-20.38585	50.0	-5.508382	3.051284	1.7812877	-14.586981	464000	2.6226044e-09	3.7757156	-0.009368888	-1.9311054	0.048064757	0.0029625683	0.10825	79.0	405.5006983280182
116	-13.582477	2.3929274	-8.358955	-19.364714	50.0	-5.686436	2.7463882	2.4361715	-13.8117285	468000	-7.152557e-09	3.6404881	-0.009202797	-1.9878277	0.040357336	0.0038006944	0.1155	79.0	409.10224509239197
117	-13.265035	2.3720813	-8.192377	-19.62519	50.0	-5.6371093	2.7492921	0.75540555	-13.642298	472000	-3.8146974e-09	3.9921794	-0.0076423083	-1.9315009	0.032378178	0.003301989	0.08975	79.0	412.6944944858551
118	-13.332934	2.5597432	-7.985338	-19.751429	50.0	-5.453224	2.776968	2.6100752	-14.292233	476000	7.629395e-09	3.8412385	-0.0073199077	-1.9173565	0.025548492	0.002810511	0.073	79.0	416.24820280075073
119	-12.932631	1.9727392	-8.181723	-17.492012	50.0	-5.3046503	2.5210137	2.383382	-13.205252	480000	-7.1525574e-10	3.749888	-0.0076358384	-2.0451927	0.020529956	0.0020872822	0.0785	79.0	419.86037278175354
120	-12.774037	2.202008	-8.177232	-18.926575	50.0	-5.3842483	2.771667	2.568615	-13.534095	484000	-4.529953e-09	5.1693845	-0.008328324	-3.082241	0.013697715	0.0010879699	0.115	79.0	423.40357542037964
121	-12.675786	2.2902818	-7.9677944	-18.359327	50.0	-5.1712446	2.6295657	3.8379545	-12.569207	488000	1.5497207e-08	4.2882047	-0.008400235	-2.4039202	0.006914997	0.0015803239	0.08375	79.0	426.83066725730896
122	-12.380942	2.1236856	-8.048215	-16.514082	50.0	-5.2060237	2.5207562	1.9178855	-13.45978	492000	-3.9339065e-09	3.7812583	-0.007466277	-2.2315798	0.00010603666	0.00080004946	0.0895	79.0	432.3856887817383
123	-12.317912	2.1384406	-7.8883176	-16.432007	50.0	-5.1771226	2.6801178	2.3456821	-13.030508	496000	1.5497208e-09	3.6089234	-0.008565108	-1.9020599	-0.0072101946	0.0023835076	0.111	79.0	436.39952421188354
124	-12.3649645	1.9637638	-8.767556	-17.346592	50.0	-4.900358	2.4368749	1.7193855	-12.499397	500000	-1.8835069e-08	3.9301836	-0.00841765	-2.3015828	-0.015852287	0.0034751336	0.0965	79.0	440.10995721817017
125	-12.506195	2.3416069	-7.4622717	-17.555433	50.0	-5.3182225	2.6748445	1.0731883	-13.246801	504000	-9.536743e-09	3.963619	-0.009136848	-2.3549304	-0.021894233	0.001739819	0.10975	79.0	443.6293008327484
126	-12.129538	2.1776018	-7.9828534	-16.47177	50.0	-5.1276746	2.5786955	1.311341	-13.059213	508000	5.4836273e-09	3.539142	-0.007920993	-2.156794	-0.029503543	0.0027233562	0.09675	79.0	447.0479271411896
127	-12.164934	2.3827999	-8.076805	-18.518492	50.0	-4.9192886	2.6787016	3.1158323	-12.693454	512000	5.2452087e-09	3.262285	-0.008062096	-2.0434418	-0.035712067	0.000882879	0.0905	79.0	455.5191128253937
128	-11.881564	1.9380873	-7.574569	-15.623033	50.0	-4.8620195	2.4630113	1.2274055	-12.25595	516000	8.5830685e-09	3.1566734	-0.0082531115	-1.8952103	-0.04062354	0.00441317	0.08825	79.0	459.0451514720917
129	-11.361705	2.3713176	-6.7484093	-17.451174	50.0	-4.5583534	2.4634087	1.6639106	-12.081591	520000	-3.218651e-09	3.7720335	-0.008834155	-2.182805	-0.046995558	0.0017840124	0.10275	79.0	462.4073712825775
130	-11.230516	2.360412	-6.734156	-17.558926	50.0	-4.8995914	2.43338	1.63067	-12.3646	524000	9.536743e-09	3.5887685	-0.008594406	-2.1175764	-0.05525479	0.0032320134	0.10725	79.0	465.70866227149963
131	-11.261416	2.3652084	-6.9319825	-17.837257	50.0	-4.5292754	2.4332652	1.6085424	-12.796349	528000	-1.4305115e-09	3.4317129	-0.010274214	-1.9385952	-0.063669235	0.0023504938	0.105	79.0	469.322140455246
132	-11.012342	2.0972676	-6.9767113	-15.606411	50.0	-4.5673504	2.1938834	1.4519856	-11.622262	532000	1.4781952e-08	3.0804982	-0.008739503	-1.6000243	-0.07196653	0.0022168378	0.10925	79.0	472.80479097366333
133	-11.2347	2.2167003	-7.1827016	-16.12678	50.0	-4.4496408	2.381169	0.5291902	-12.456939	536000	7.629395e-09	3.1553664	-0.0077255564	-1.7005163	-0.078603014	0.0022735766	0.0825	79.0	476.4995160102844
134	-11.220938	2.165322	-7.236899	-16.610098	50.0	-4.841835	2.368859	0.64544713	-12.29679	540000	-4.768372e-10	2.612318	-0.0071364744	-1.4419163	-0.0871459	0.0002089606	0.08	79.0	480.22877740859985
135	-10.766868	2.2333589	-6.655528	-15.566144	50.0	-4.3385277	2.388446	1.4571812	-13.095348	544000	2.6226044e-09	3.0210474	-0.009187574	-1.8025974	-0.09685604	0.0032612374	0.1175	79.0	483.75310945510864
136	-10.599749	2.253551	-6.5611763	-15.948607	50.0	-4.2571425	2.1495464	0.7571238	-12.068723	548000	-2.6226044e-09	2.6296744	-0.00981752	-1.419364	-0.10447773	0.0023749464	0.1075	79.0	487.26005244255066
137	-10.615412	1.9876664	-6.3879137	-15.080053	50.0	-4.254165	2.2393978	1.3359926	-12.266357	552000	9.298325e-09	2.2935596	-0.0072034243	-1.1851469	-0.11487098	0.0014094694	0.107	79.0	490.93382930755615
138	-10.94984	2.2083309	-6.603939	-14.578946	50.0	-4.2964773	2.2596571	1.7092967	-11.163186	556000	1.9073487e-09	2.342128	-0.008111536	-1.2741704	-0.12126814	0.0022455116	0.10425	79.0	494.723158121109
139	-10.325282	2.1149952	-6.440517	-16.769476	50.0	-4.2135224	2.2325802	0.4461126	-12.065005	560000	-1.078844e-08	2.4124184	-0.007781249	-1.3445582	-0.12677766	0.001553368	0.086	79.0	498.5034852027893
140	-10.157314	2.377969	-5.8010077	-15.3958435	50.0	-3.958605	2.122612	1.4282744	-12.366938	564000	-4.7683715e-09	2.2871156	-0.009364864	-1.3537278	-0.13577361	0.0020476119	0.102	79.0	502.24823331832886
141	-9.785613	2.0522938	-6.761251	-15.271101	50.0	-4.042841	2.1996691	5.0916	-12.154634	568000	-1.01923945e-08	2.0929382	-0.008283465	-1.2115431	-0.14510474	0.003028415	0.10825	79.0	506.1247684955597
142	-10.285822	1.9539392	-6.292193	-14.730723	50.0	-4.103832	2.1804683	1.681987	-11.525295	572000	-2.384186e-10	2.272697	-0.008280765	-1.2802287	-0.15311755	0.0008981905	0.094	79.0	509.6871247291565
143	-9.984294	2.0086899	-6.0338535	-14.984634	50.0	-3.9836936	2.2072139	1.000194	-11.560814	576000	-2.0503998e-08	2.773866	-0.0070643667	-1.6256675	-0.15959218	0.0037318962	0.09725	79.0	513.8303740024567
144	-10.248091	2.2181082	-6.536023	-16.397114	50.0	-4.0194683	2.21049	0.89666975	-11.13546	580000	1.0550022e-08	2.3987799	-0.008297779	-1.3979961	-0.16626288	0.0023322771	0.09525	79.0	517.3570518493652
145	-9.99088	2.0970557	-6.2468452	-14.878789	50.0	-4.1209865	2.190563	1.1821389	-11.6019335	584000	-1.001358e-08	1.9923185	-0.0074018864	-1.2086836	-0.17448114	0.0019417267	0.0625	79.0	520.7613248825073
146	-9.490654	2.0905838	-5.713138	-14.03683	50.0	-3.821314	2.0549152	0.2984623	-11.4620285	588000	4.053116e-09	1.9746003	-0.0098512275	-1.0717235	-0.18506938	0.0045360033	0.1295	79.0	524.1943700313568
147	-10.142784	2.2832644	-6.1091943	-15.453088	50.0	-3.9816322	2.2484503	1.6750209	-11.096276	592000	1.1444092e-08	1.8987573	-0.009277267	-1.0174341	-0.19229892	0.0018989701	0.09875	79.0	527.8198993206024
148	-9.576352	2.267272	-6.186177	-14.74801	50.0	-3.7003193	2.0654197	1.4799042	-11.452326	596000	-3.5762786e-09	1.6543437	-0.00660491	-0.8315211	-0.20198749	0.0017342052	0.07725	79.0	531.2478737831116
149	-9.394531	1.9923698	-5.312509	-13.475136	50.0	-3.85637	2.0284042	2.2694707	-11.382589	600000	3.8146974e-09	1.5806426	-0.0075613945	-0.8313087	-0.20757286	0.0032478934	0.10375	79.0	534.5151126384735
150	-9.048266	2.2705343	-5.8087564	-15.579843	50.0	-3.36744	1.9883522	1.0133387	-10.525125	604000	1.4305114e-08	1.9997424	-0.0078247115	-1.2244904	-0.21327017	0.002161674	0.092	79.0	538.2338345050812
151	-10.001343	2.2182434	-6.443653	-15.048734	50.0	-4.0167456	2.0364106	-0.10850224	-11.097574	608000	-4.529953e-09	1.7840482	-0.008285898	-0.9882866	-0.22064616	0.0050718463	0.08775	79.0	541.8969576358795
152	-9.217955	2.070463	-5.485874	-13.373188	50.0	-3.941943	1.9022719	0.6062489	-11.045772	612000	-1.0848045e-08	1.7273353	-0.009309295	-0.902983	-0.22926897	0.0021234378	0.11675	79.0	546.235668182373
153	-9.47175	2.037552	-5.5262423	-17.389393	50.0	-3.6295142	2.0286098	1.2236896	-10.761387	616000	-8.106232e-09	1.9126683	-0.008732661	-1.1143347	-0.23564044	0.0025314835	0.10125	79.0	550.6514148712158
154	-9.1099415	2.061478	-5.761503	-15.570524	50.0	-3.5615766	1.9954145	1.6064886	-10.751791	620000	2.6226044e-09	1.9917595	-0.009915279	-1.2700281	-0.24263808	0.004716899	0.12075	79.0	554.1123361587524
155	-9.132412	2.0784397	-5.3145347	-13.362409	50.0	-3.6404517	2.0894766	0.25996163	-10.570901	624000	1.6450882e-08	1.6306719	-0.008311429	-0.8795077	-0.24997288	0.0026375859	0.09925	79.0	557.513513803482
156	-9.104431	1.9390048	-5.940763	-14.757642	50.0	-3.3066053	1.9472871	2.7236571	-9.751606	628000	-2.7418137e-09	1.4697427	-0.008198435	-0.84555733	-0.25840658	0.0032544737	0.087	79.0	561.2338016033173
157	-8.451403	1.8342425	-5.582975	-13.541424	50.0	-3.3316185	1.8647695	1.8347871	-10.046434	632000	1.4185906e-08	1.2754323	-0.0073907543	-0.693025	-0.26579532	0.0020191348	0.07775	79.0	564.872364282608
158	-8.822993	1.9102365	-5.2546635	-13.657942	50.0	-3.2621353	1.9586381	1.8121668	-10.077105	636000	2.1457671e-09	1.5303547	-0.008683693	-0.8680833	-0.2733534	0.0045533525	0.11425	79.0	568.1436851024628
159	-8.628527	1.901172	-5.2287803	-13.852667	50.0	-3.3715985	1.7985035	0.7502955	-9.912743	640000	-8.106232e-09	1.4877902	-0.0069547365	-0.7699978	-0.28053918	0.0026566924	0.07825	79.0	571.7692360877991
160	-8.431958	1.9311608	-5.134284	-12.418977	50.0	-3.2130003	1.8616318	1.2317183	-10.174027	644000	1.9311905e-08	1.4970528	-0.007838745	-0.9148228	-0.28953698	0.0032013687	0.094	79.0	575.6270587444305
161	-8.212669	1.5846612	-5.442575	-12.994559	50.0	-3.1402683	1.7027795	1.2020525	-8.849955	648000	-1.4066696e-08	1.5439756	-0.00770795	-0.9411025	-0.29681858	0.0024137842	0.09175	79.0	579.2654895782471
162	-8.33627	2.0790944	-4.4390616	-12.900836	50.0	-3.1038034	1.8610098	1.4120145	-8.94104	652000	-2.384186e-10	1.3302797	-0.00729992	-0.7432218	-0.30403867	0.001609867	0.0855	79.0	582.4997022151947
163	-8.304527	1.815046	-5.030995	-12.595767	50.0	-3.1413388	1.8218386	0.5868588	-9.700122	656000	1.001358e-08	1.121544	-0.00767317	-0.61516404	-0.31114843	0.0012076686	0.09975	79.0	585.8641896247864
164	-8.246704	1.9379904	-4.124165	-12.271271	50.0	-3.0518634	1.8096607	0.7370823	-9.178884	660000	1.0251999e-08	1.1167346	-0.0078058266	-0.61467975	-0.31789625	0.0040441784	0.09975	79.0	589.0911319255829
165	-8.232189	2.0229216	-5.0211296	-15.60845	50.0	-2.9606845	1.7838598	0.70337653	-8.937049	664000	6.6757204e-09	1.1351975	-0.007807657	-0.62168384	-0.3241486	0.0014452352	0.07875	79.0	591.9835963249207
166	-7.8540635	1.6659055	-4.929071	-12.436957	50.0	-2.8489857	1.7125183	0.79270875	-9.325961	668000	5.2452087e-09	1.0675815	-0.0075403303	-0.5288734	-0.33232138	0.0030298408	0.0825	79.0	594.7746856212616
167	-7.905757	1.6582674	-4.352003	-12.1567745	50.0	-3.0200763	1.6923597	1.5104653	-9.038843	672000	6.9141386e-09	1.3493496	-0.00791713	-0.7966929	-0.34049615	0.002140429	0.09625	79.0	597.6284143924713
168	-7.7946763	1.6380153	-4.7957335	-13.216466	50.0	-2.8483398	1.6941019	0.68390787	-8.864787	676000	-5.2452087e-09	1.0835341	-0.007486218	-0.62951905	-0.34966195	0.0030033914	0.08875	79.0	600.6941576004028
169	-7.7171555	1.5992141	-4.2202816	-11.5758915	50.0	-2.7439165	1.6832073	0.3752734	-9.187379	680000	4.768372e-10	0.94650596	-0.007820513	-0.45451188	-0.35683435	0.0017063317	0.0915	79.0	603.748836517334
170	-7.6711683	1.811096	-4.9055166	-13.432554	50.0	-2.7126288	1.6032984	0.9333344	-9.336078	684000	-2.5510788e-08	1.1811738	-0.007371485	-0.62391704	-0.36613622	0.0031048667	0.09825	79.0	606.8046174049377
171	-7.4236426	1.5482515	-4.9874682	-12.482066	50.0	-2.7253199	1.5891274	0.5360025	-8.950311	688000	-1.0251999e-08	1.1987808	-0.00866081	-0.7645198	-0.3726704	0.0020638234	0.104	79.0	609.5763971805573
172	-7.418566	1.5170093	-4.9048285	-10.907251	50.0	-2.7437232	1.6397504	0.42882693	-10.204818	692000	-7.1525574e-10	1.0488025	-0.0073444955	-0.61363566	-0.3798093	0.0018295703	0.09	79.0	612.398989200592
173	-7.339331	1.5699726	-4.6466746	-11.514813	50.0	-2.5777986	1.4742619	0.86564666	-8.337157	696000	7.390976e-09	0.9663187	-0.006499005	-0.49306923	-0.38682526	0.0030783892	0.06025	79.0	615.2473411560059
174	-7.5579147	1.5738493	-4.4200406	-11.311041	50.0	-2.7679029	1.590061	0.8695856	-9.500349	700000	-6.9141386e-09	0.946586	-0.007256228	-0.477706	-0.39287564	0.002639078	0.074	79.0	618.2033941745758
175	-7.300336	1.671408	-4.4859986	-12.442418	50.0	-2.6383486	1.5488656	0.60282195	-8.97837	704000	-1.192093e-10	0.8814274	-0.007682808	-0.43871877	-0.40031812	0.005290157	0.1085	79.0	621.3557684421539
176	-7.163106	1.5639986	-3.7439	-10.946157	50.0	-2.6894424	1.5740767	0.47994104	-9.084453	708000	-1.66893e-08	0.80412453	-0.00778746	-0.4341446	-0.40656182	0.0016864128	0.10475	79.0	624.5052351951599
177	-7.390055	1.461223	-4.7995152	-10.699063	50.0	-2.7203908	1.5690925	1.2539122	-8.61963	712000	-1.1444092e-08	0.8768398	-0.0076235025	-0.4132094	-0.41341382	0.002208906	0.09975	79.0	627.7473156452179
178	-7.1885223	1.6273216	-4.8989224	-11.9213295	50.0	-2.4704566	1.5525799	0.9974241	-8.673873	716000	-2.6702882e-08	0.68925965	-0.0066156355	-0.3493202	-0.42087963	0.0012694212	0.071	79.0	631.1022584438324
179	-7.187996	1.693277	-4.0468235	-11.798831	50.0	-2.510811	1.5933524	0.95066816	-8.73519	720000	9.298325e-09	0.746952	-0.005922322	-0.40125948	-0.42875358	0.0012443234	0.08075	79.0	636.3301930427551
180	-7.4139085	1.5711308	-4.206909	-10.745201	50.0	-2.6404335	1.5609231	0.28507093	-8.184548	724000	-6.198883e-09	0.6298407	-0.007092879	-0.29893172	-0.4343153	0.0018137497	0.09225	79.0	639.7309205532074
181	-6.91949	1.7449512	-4.012977	-11.577891	50.0	-2.3705444	1.4928423	1.0785286	-8.006649	728000	-1.4305115e-09	0.6373964	-0.008483539	-0.2975294	-0.44312537	0.0024540725	0.094	79.0	643.0702369213104
182	-6.890195	1.6433175	-3.9923842	-11.432901	50.0	-2.505291	1.5343989	0.34480256	-9.016148	732000	-5.2452087e-09	0.6103574	-0.006874935	-0.3044908	-0.45378795	0.002917407	0.084	79.0	646.6084809303284
183	-7.0174017	1.6302639	-4.4159102	-11.793239	50.0	-2.375013	1.5228354	0.6273793	-8.6762	736000	-7.629395e-09	0.7014108	-0.008434968	-0.3544023	-0.4622888	0.004109053	0.101	79.0	649.7987463474274
184	-6.683938	1.4078287	-3.9206436	-10.370077	50.0	-2.33537	1.4720554	1.0704532	-8.477201	740000	-2.5272369e-08	0.5883383	-0.006908298	-0.28774714	-0.47041804	0.0028605466	0.0825	79.0	652.8852188587189
185	-6.7855506	1.6672866	-4.2499604	-10.61416	50.0	-2.3711805	1.4601073	0.28080314	-8.632881	744000	-5.9604646e-09	0.4804416	-0.007827984	-0.17909586	-0.4789632	0.0019368255	0.103	79.0	655.9692850112915
186	-6.7546372	1.5296388	-3.4819732	-10.170561	50.0	-2.2910182	1.4456387	0.22586986	-8.490251	748000	-6.3180923e-09	0.5189408	-0.008173359	-0.20255998	-0.4874116	0.0025993187	0.1095	79.0	659.0044467449188
187	-6.647952	1.5884746	-3.7228403	-10.002879	50.0	-2.2861943	1.4609079	1.0597874	-7.8709364	752000	-2.6226044e-09	0.51233447	-0.005810521	-0.24342951	-0.49575913	0.0008740238	0.07375	79.0	661.8404698371887
188	-6.4340234	1.4543542	-4.259623	-10.324916	50.0	-2.087591	1.4203732	0.66905266	-8.09854	756000	-2.861023e-09	0.5314139	-0.0070389775	-0.22271577	-0.50153613	0.0013640791	0.086	79.0	664.6717994213104
189	-6.5293465	1.3755741	-4.005746	-9.612545	50.0	-2.2382934	1.3872663	0.41133928	-7.6560235	760000	-5.2452087e-09	0.46880946	-0.008052976	-0.21071339	-0.50957936	0.0034841842	0.105	79.0	667.9675476551056
190	-6.4167557	1.5813165	-3.3751347	-10.052159	50.0	-2.083287	1.3856382	1.2929602	-7.9744034	764000	1.9073487e-09	0.60047907	-0.007715636	-0.30350313	-0.5159187	0.003671378	0.11575	79.0	671.1466462612152
191	-6.232285	1.6532545	-3.082993	-10.549606	50.0	-2.0933843	1.3828578	0.8596497	-7.6485863	768000	2.8371812e-08	0.539344	-0.007547568	-0.2542294	-0.5243521	0.0035200317	0.08475	79.0	674.8115804195404
192	-6.3193398	1.7189664	-3.5165546	-11.248062	50.0	-2.166018	1.39494	0.5320454	-7.8708644	772000	-7.1525574e-10	0.48258924	-0.009089487	-0.23138806	-0.53139234	0.0021870083	0.10375	79.0	678.4118690490723
193	-5.8949556	1.4167312	-3.7420874	-9.772938	50.0	-2.016526	1.2854171	0.7538374	-8.146292	776000	6.198883e-09	0.46193606	-0.007410096	-0.24316497	-0.5384441	0.0032174254	0.0935	79.0	681.933929681778
194	-6.2541213	1.4514474	-3.8273	-9.441031	50.0	-2.1176772	1.3612387	0.36137763	-8.39037	780000	-6.6757204e-09	0.49852931	-0.008760276	-0.26646906	-0.5467065	0.0015154086	0.11575	79.0	686.4690773487091
195	-6.2156487	1.5220851	-3.6193397	-9.398466	50.0	-1.9766047	1.3321398	0.48111743	-7.769317	784000	5.4836273e-09	0.38405353	-0.008543662	-0.17097947	-0.55384153	0.0022043672	0.1045	79.0	689.8728981018066
196	-5.8972116	1.4793074	-3.1103373	-9.127738	50.0	-1.9038081	1.3334248	0.6446178	-7.795005	788000	-1.3589859e-08	0.34003353	-0.006884982	-0.15046166	-0.5612531	0.002144541	0.092	79.0	693.3894772529602
197	-6.221271	1.5605897	-3.3139067	-9.825221	50.0	-2.0167868	1.3279183	0.26125234	-7.6749697	792000	6.0796737e-09	0.35256773	-0.0076980903	-0.17364244	-0.5702278	0.0018845352	0.09825	79.0	696.9588806629181
198	-6.0990515	1.6283205	-3.5210276	-9.8295965	50.0	-1.8394746	1.2888958	0.94840586	-7.7172756	796000	-1.4066696e-08	0.51375484	-0.008812783	-0.2720754	-0.5790591	0.003127195	0.09925	79.0	700.4391314983368
199	-6.2018647	1.7675155	-3.2792878	-10.433738	50.0	-2.025074	1.4151576	0.7341525	-7.658041	800000	-5.2452087e-09	0.46050838	-0.00868521	-0.23262289	-0.5878836	0.0033360308	0.1175	79.0	703.8696005344391
200	-5.808236	1.5728294	-3.1210458	-9.290951	50.0	-1.9266318	1.2936451	0.76725185	-7.844646	804000	-9.179115e-09	0.3393457	-0.009446526	-0.16925922	-0.59557897	0.0041867923	0.0975	79.0	707.5205891132355
201	-6.0623384	1.5109775	-3.2335718	-8.95691	50.0	-1.8562539	1.3237023	0.09514607	-7.3866777	808000	4.053116e-09	0.33173057	-0.00823721	-0.14348501	-0.60377175	0.0029826842	0.10925	79.0	711.2492609024048
202	-5.9948354	1.4912443	-3.4882832	-9.128548	50.0	-1.8203552	1.3100436	-0.047360595	-7.330983	812000	1.7404556e-08	0.37244388	-0.00803905	-0.1824219	-0.6121605	0.0016201466	0.103	79.0	715.1586010456085
203	-5.636729	1.412636	-3.1888719	-10.567271	50.0	-1.7913208	1.240035	0.11975964	-7.542045	816000	-1.5497208e-09	0.30642146	-0.0073723565	-0.15458262	-0.6197953	0.0023358872	0.09675	79.0	719.448263168335
204	-5.511441	1.3651664	-3.1655378	-9.642221	50.0	-1.7631274	1.2386206	0.78897506	-7.8753195	820000	-2.0980835e-08	0.31564426	-0.007498643	-0.14492998	-0.6259917	0.0036011855	0.08125	79.0	723.0868372917175
205	-5.722289	1.4791815	-3.4242804	-9.001197	50.0	-1.6981624	1.1945385	0.43661475	-7.5303845	824000	-9.298325e-09	0.3100261	-0.0067094616	-0.12670842	-0.63352513	0.0025101725	0.07725	79.0	726.6541023254395
206	-5.533845	1.6263509	-2.7676244	-10.504443	50.0	-1.6966001	1.1882594	0.046537556	-7.41584	828000	-5.2452087e-09	0.28023198	-0.0072697024	-0.120646924	-0.64118713	0.0016418457	0.1005	79.0	730.1585416793823
207	-5.363187	1.4485273	-3.2588067	-8.955271	50.0	-1.7583061	1.170987	2.5946124	-7.344661	832000	9.536743e-09	0.24388044	-0.0072132256	-0.11539599	-0.64733434	0.0013762304	0.11075	79.0	733.6742451190948
208	-5.645566	1.4774191	-3.3996716	-9.052859	50.0	-1.6710408	1.2643436	0.5015844	-7.5394473	836000	-3.8146974e-09	0.30196506	-0.006362862	-0.1645881	-0.6541032	0.0016190152	0.07925	79.0	745.0661206245422
209	-5.4341455	1.5401672	-3.138004	-9.1095	50.0	-1.6746018	1.1522783	0.34726477	-7.018722	840000	-1.4066696e-08	0.286412	-0.007782492	-0.12790908	-0.6586816	0.0044813356	0.1065	79.0	748.3655836582184
210	-5.575532	1.6283094	-2.694866	-9.119828	50.0	-1.7279255	1.2534668	0.1314646	-7.426568	844000	-1.3113022e-08	0.33920255	-0.008462082	-0.1398214	-0.66364056	0.0016797878	0.0975	79.0	751.6402380466461
211	-5.635331	1.5820428	-3.0982459	-9.321051	50.0	-1.6772382	1.1843008	0.6048088	-7.1756344	848000	-1.3828277e-08	0.29081517	-0.0071245697	-0.14158456	-0.67344373	0.004609645	0.07875	79.0	754.8672504425049
212	-5.1457243	1.3408911	-3.1802683	-9.4780035	50.0	-1.6203127	1.1568645	0.10753705	-7.2884	852000	1.0967255e-08	0.22713698	-0.0067062173	-0.091630295	-0.68186885	0.0027140742	0.08475	79.0	758.1605641841888
213	-5.06094	1.2609288	-3.2264829	-8.650537	50.0	-1.5591822	1.1311269	-0.11008087	-7.3653693	856000	1.3113022e-09	0.22030316	-0.00737678	-0.08887631	-0.6903457	0.002147744	0.0825	79.0	761.3741207122803
214	-5.1403246	1.4155269	-2.9235547	-8.800336	50.0	-1.5253037	1.1316863	0.094851986	-7.180966	860000	-1.66893e-08	0.22884816	-0.007972487	-0.10398197	-0.69885695	0.0036717942	0.099	79.0	764.6410765647888
215	-5.12266	1.3033897	-2.950368	-8.900084	50.0	-1.5153005	1.0776014	0.47062814	-7.3075256	864000	3.3378602e-09	0.26737157	-0.008609183	-0.11253217	-0.7088042	0.0031623	0.113	79.0	770.8904349803925
216	-5.494945	1.6587343	-3.05425	-10.090812	50.0	-1.6614012	1.1985645	-0.084729336	-7.4437475	868000	-2.360344e-08	0.20099962	-0.009021308	-0.088473596	-0.71628904	0.004633595	0.1085	79.0	781.2774221897125
217	-5.03552	1.4618582	-3.1116908	-8.947827	50.0	-1.5447009	1.172567	0.13056387	-7.5645103	872000	-4.053116e-09	0.1941213	-0.0075614857	-0.08443027	-0.72470087	0.0025124734	0.09325	79.0	790.3209867477417
218	-5.1738777	1.5685667	-2.7995777	-8.372139	50.0	-1.5377312	1.1875685	0.96357983	-7.2121015	876000	2.503395e-09	0.2642213	-0.008243518	-0.14765796	-0.73272973	0.00034244815	0.102	79.0	795.0917809009552
219	-5.2103395	1.3926367	-2.9818366	-9.256103	50.0	-1.5643394	1.1673815	0.15532814	-6.7172675	880000	6.198883e-09	0.1812673	-0.008309072	-0.077454895	-0.7387874	0.0030661358	0.094	79.0	798.6035048961639
220	-4.7181892	1.3347255	-3.0743444	-8.859494	50.0	-1.4095442	1.053233	1.0021019	-6.8398814	884000	-2.4318695e-08	0.18181354	-0.007171775	-0.08759961	-0.74840236	0.0041768025	0.09025	79.0	802.2930998802185
221	-5.2600346	1.6125884	-2.9241772	-10.016215	50.0	-1.5016274	1.2000773	0.07041968	-7.1543694	888000	2.861023e-09	0.2384787	-0.007998678	-0.11603505	-0.7568557	0.0043288204	0.07975	79.0	805.8671402931213
222	-4.9408236	1.4183042	-2.721566	-8.027949	50.0	-1.4595591	1.2274683	0.39669403	-7.423383	892000	9.536744e-10	0.26870045	-0.0073392717	-0.14697741	-0.7667919	0.0039987667	0.09775	79.0	809.3565907478333
223	-4.9951153	1.2320955	-2.9782486	-8.03922	50.0	-1.4204624	1.0615615	0.15769745	-6.580815	896000	1.6868114e-08	0.21495877	-0.007768147	-0.09210041	-0.77347344	0.0039644893	0.08925	79.0	812.9174053668976
224	-4.941969	1.4745584	-2.7089386	-8.704919	50.0	-1.4089754	1.1553196	-0.055421144	-6.902208	900000	4.2915342e-09	0.14699022	-0.007791989	-0.05936054	-0.78124744	0.0033625178	0.08975	79.0	816.3979067802429
225	-4.9159245	1.3752801	-2.7536712	-8.02725	50.0	-1.3567253	1.116898	-0.062934235	-6.8917036	904000	-2.861023e-09	0.13053097	-0.007821693	-0.045854867	-0.79036087	0.0023774314	0.099	79.0	819.8408343791962
226	-5.0153074	1.5586816	-2.5002718	-8.234355	50.0	-1.4322221	1.1571285	0.16609812	-6.8302193	908000	3.242493e-08	0.13582036	-0.007068084	-0.051552415	-0.7973285	0.001552641	0.0975	79.0	823.2173302173615
227	-5.156153	1.465145	-2.7223506	-8.406598	50.0	-1.3890257	1.1550231	0.114957444	-7.006025	912000	2.6941299e-08	0.14067835	-0.0061533074	-0.05365561	-0.80471593	0.0024942115	0.067	79.0	826.9307334423065
228	-4.7281394	1.3971605	-2.9287224	-8.056328	50.0	-1.334888	1.101866	0.016332952	-6.592728	916000	-1.0967255e-08	0.1328754	-0.0056213182	-0.05329314	-0.81411195	0.0018446769	0.0665	79.0	830.4694991111755
229	-4.8196235	1.4470636	-2.5364354	-8.007244	50.0	-1.2953926	1.0916185	-0.09067103	-6.7665076	920000	-4.768372e-10	0.11796869	-0.00746697	-0.04782234	-0.82105774	0.00316567	0.07775	79.0	835.7214913368225
230	-4.537121	1.2719892	-2.4955273	-7.7808065	50.0	-1.268028	1.0574116	-0.00022763759	-6.7349586	924000	2.002716e-08	0.13098441	-0.007678463	-0.05490025	-0.8293405	0.0034078597	0.11	79.0	846.5837955474854
231	-4.6070647	1.346082	-2.4960425	-7.7581167	50.0	-1.2295636	1.0448896	0.68922335	-6.5354185	928000	-2.5629998e-09	0.15016437	-0.007188818	-0.0605554	-0.8360713	0.0021440045	0.076	79.0	855.9173560142517
232	-4.558564	1.3415856	-2.4427712	-8.296356	50.0	-1.2328808	1.0221689	-0.037555262	-6.34174	932000	-1.001358e-08	0.108087204	-0.0077411775	-0.045305356	-0.84477395	0.0039878082	0.0885	79.0	859.503525018692
233	-4.7414865	1.3402079	-2.5235786	-7.984985	50.0	-1.2665454	1.0651463	0.1154812	-6.639272	936000	2.3126603e-08	0.16465956	-0.00853114	-0.084698714	-0.85346705	0.0031532787	0.1135	79.0	863.1495566368103
234	-4.650669	1.4914734	-2.476019	-8.34434	50.0	-1.2479407	1.1099197	-0.12367395	-6.4810038	940000	-1.4781952e-08	0.13478409	-0.0079790065	-0.062110715	-0.8609304	0.0009938151	0.09775	79.0	866.4240727424622
235	-4.2734766	1.141575	-2.310247	-8.023411	50.0	-1.1774828	0.94640154	-0.07267747	-6.37513	944000	2.6226044e-08	0.099502	-0.0073129083	-0.04004996	-0.86964315	0.0019079293	0.074	79.0	869.8346900939941
236	-4.565352	1.3517207	-2.5122736	-7.7661166	50.0	-1.2006011	1.097184	0.063169554	-6.8650427	948000	-1.2874604e-08	0.10324392	-0.007010794	-0.03652861	-0.8775258	0.0021045133	0.077	79.0	873.3506577014923
237	-4.726365	1.4560153	-2.4237847	-7.6215158	50.0	-1.2174661	1.0564816	-0.0030009737	-6.499901	952000	1.0490417e-08	0.11017287	-0.0064073354	-0.041317895	-0.88577944	0.0027773248	0.11725	79.0	877.0017385482788
238	-4.561775	1.3001041	-2.2847517	-7.707976	50.0	-1.1948724	1.0221851	0.1393714	-6.543081	956000	5.722046e-09	0.10342382	-0.008364048	-0.037998505	-0.893675	0.0053090556	0.1085	79.0	880.5210635662079
239	-4.463866	1.4571722	-2.2232766	-7.561072	50.0	-1.1661499	1.0459876	0.22340776	-6.5254717	960000	9.775162e-09	0.11492199	-0.008194241	-0.044620372	-0.90152735	0.0033721237	0.09	79.0	883.9384927749634
240	-4.607596	1.5366106	-2.636619	-7.532312	50.0	-1.1851003	1.0559332	-0.0020645089	-6.3002996	964000	-1.8119811e-08	0.0944757	-0.0077424604	-0.033118162	-0.91113544	0.004407788	0.137	79.0	887.4041066169739
241	-4.3950815	1.1949682	-2.3644063	-7.374389	50.0	-1.1144198	1.0291158	-0.007558777	-6.4534307	968000	-9.059906e-09	0.11324916	-0.008158366	-0.03992159	-0.9186315	0.0030427272	0.089	79.0	890.9257349967957
242	-4.210849	1.3797755	-2.1921568	-7.486165	50.0	-1.08829	0.98265624	-0.05414569	-6.2741528	972000	-5.00679e-09	0.07991991	-0.006900049	-0.027827844	-0.9281561	0.0015874052	0.083	79.0	894.8669736385345
243	-4.3632364	1.4103745	-2.5535963	-7.748352	50.0	-1.0772195	1.0355239	-0.02415636	-6.3059707	976000	-2.169609e-08	0.075770795	-0.0071657686	-0.030786555	-0.9371714	0.0017885254	0.099	79.0	898.5263950824738
244	-4.4804773	1.3984377	-2.4266825	-7.9657483	50.0	-1.0904758	1.0225816	0.124856725	-6.4039235	980000	1.525879e-08	0.07131986	-0.0077903336	-0.029387947	-0.94447166	0.0031134728	0.078	79.0	902.3077535629272
245	-4.2659674	1.4719964	-2.1074877	-8.018774	50.0	-1.0641663	1.0272441	-0.010100554	-6.5745296	984000	-3.242493e-08	0.09577888	-0.007197829	-0.035661373	-0.9508076	0.0014734282	0.07975	79.0	907.1035797595978
246	-4.450372	1.4321412	-2.5023086	-7.502327	50.0	-1.1215012	1.0530014	-0.095804095	-6.210925	988000	1.0490417e-08	0.08216224	-0.007403361	-0.026916225	-0.9581756	0.0033744073	0.078	79.0	910.7324371337891
247	-4.3112273	1.3612	-2.4305992	-8.128245	50.0	-1.0917642	1.0222609	0.11628437	-6.3493733	992000	-8.5830685e-09	0.071447335	-0.008531005	-0.02773849	-0.96514994	0.0034517918	0.081	79.0	914.3566977977753
248	-4.182203	1.3622888	-2.3321028	-7.517754	50.0	-1.0358804	0.99205625	-0.047795713	-6.4896607	996000	-2.0980835e-08	0.06720672	-0.008804063	-0.025994033	-0.97457737	0.0033625937	0.121	79.0	917.917368888855
249	-4.2081466	1.2830684	-2.4765027	-7.4562645	50.0	-1.0563806	0.9843704	0.008001256	-6.280951	1000000	2.0503998e-08	0.06459153	-0.007380526	-0.023895994	-0.98195636	0.0035776028	0.08975	79.0	921.5676925182343
250	-3.941443	1.4491899	-2.3554745	-7.275187	50.0	-0.9815588	0.9305149	-0.007319005	-6.253956	1004000	1.525879e-08	0.061905693	-0.007070475	-0.022879165	-0.98966795	0.005695232	0.08275	79.0	925.3539047241211
251	-4.0290165	1.3021293	-2.1585832	-7.539763	50.0	-0.96514124	0.9379814	0.008129642	-6.076518	1008000	4.529953e-09	0.079436414	-0.009025131	-0.029748246	-0.99598587	0.0029740944	0.11225	79.0	929.1429765224457
252	-4.1876497	1.299152	-2.1597521	-7.6430798	50.0	-1.0285659	0.98442554	0.076188155	-6.5767455	1012000	1.0490417e-08	0.07300063	-0.0078122537	-0.030386433	-1.005083	0.0032785493	0.0785	79.0	932.6832690238953
253	-4.408123	1.4012969	-2.165613	-7.24051	50.0	-1.0343411	1.0339799	-0.044753335	-6.2468066	1016000	-6.198883e-09	0.0633691	-0.008072016	-0.026341133	-1.0140665	0.004609741	0.10425	79.0	935.9343841075897
254	-3.9143791	1.1507995	-2.157141	-6.7294636	50.0	-0.9578815	0.9396961	0.10236354	-5.8769875	1020000	4.053116e-09	0.050150733	-0.0075987997	-0.021651832	-1.0201702	0.0021154569	0.10175	79.0	939.133800983429
255	-4.409688	1.367876	-1.9555043	-6.9627395	50.0	-0.98521554	1.0245485	-0.03319463	-6.137172	1024000	-1.4305115e-09	0.053359956	-0.008118401	-0.015685916	-1.0282606	0.0043425965	0.0995	79.0	942.4055614471436
256	-4.227918	1.3439801	-2.3775258	-7.7623935	50.0	-0.9915431	1.0066652	0.09707536	-6.185696	1028000	1.7166137e-08	0.054033656	-0.0068400153	-0.018670827	-1.0356587	0.0025287964	0.0755	79.0	945.8927145004272
257	-3.9496696	1.4290608	-2.0020862	-7.9434214	50.0	-0.9457217	0.9541822	-0.02671983	-6.320731	1032000	2.861023e-09	0.059567712	-0.007567605	-0.02024128	-1.042725	0.0023406618	0.10175	79.0	949.3493254184723
258	-4.1262307	1.4780463	-1.847926	-7.5251026	50.0	-0.93238264	0.99712706	0.04465252	-6.404682	1036000	-1.3828277e-08	0.054644555	-0.007700237	-0.018582962	-1.0505624	0.002741503	0.119	79.0	952.9950394630432
259	-4.078009	1.2632611	-1.9241731	-6.892954	50.0	-0.91532177	0.9378876	-0.068276964	-5.9498754	1040000	-3.8146974e-09	0.053092375	-0.007900475	-0.020772208	-1.0571344	0.0038711457	0.10475	79.0	956.5946078300476
260	-3.6041236	1.2282096	-2.0314388	-7.0546	50.0	-0.8528137	0.8827651	-0.0531014	-6.2063975	1044000	4.768372e-10	0.04726698	-0.007721156	-0.018053764	-1.0644695	0.00066165224	0.07675	79.0	960.1803739070892
261	-4.0974708	1.4624177	-1.9803767	-7.0261283	50.0	-0.9084846	0.9413657	-0.028293457	-6.0197024	1048000	8.8214875e-09	0.04173319	-0.008804541	-0.018279638	-1.0745769	0.0037117049	0.10875	79.0	963.6760087013245
262	-3.6936805	1.210101	-2.0598288	-7.164652	50.0	-0.83339673	0.8719179	0.00057841465	-6.1629906	1052000	2.8610229e-08	0.058300953	-0.006589171	-0.02278892	-1.0830171	0.0028293962	0.0735	79.0	967.2350559234619
263	-3.662784	1.1776029	-1.971534	-6.919338	50.0	-0.86906624	0.85747594	-0.08625357	-6.0366125	1056000	4.7683715e-09	0.04180173	-0.0077932007	-0.014497606	-1.0893537	0.0018256045	0.08975	79.0	971.969190120697
264	-4.024611	1.3978734	-1.8275422	-7.070054	50.0	-0.90067405	0.97106725	-0.035816178	-5.9851613	1060000	2.7179718e-08	0.04070485	-0.007902791	-0.017646587	-1.0970224	0.003185316	0.10075	79.0	982.311888217926
265	-3.8037193	1.2815925	-1.9207685	-7.16367	50.0	-0.8034215	0.90502954	0.23983365	-5.9725065	1064000	0.0	0.050842144	-0.008062559	-0.020621717	-1.1055547	0.0051510343	0.094	79.0	986.2605857849121
266	-3.9763904	1.4278314	-1.8990712	-7.256644	50.0	-0.85638523	0.93551195	0.060336754	-6.14029	1068000	-4.768372e-10	0.054526765	-0.008180947	-0.027631762	-1.1125672	0.0034274799	0.07225	79.0	989.789402961731
267	-3.9370186	1.38059	-1.9113923	-7.106277	50.0	-0.82411546	0.9532712	0.00044395681	-6.05139	1072000	4.2915342e-09	0.034690667	-0.0067991344	-0.014476994	-1.1195376	0.0015784474	0.08225	79.0	993.0775849819183
268	-3.9016786	1.5622579	-1.853406	-7.2034006	50.0	-0.8144309	0.9361815	-0.023118831	-6.1797566	1076000	-2.9087067e-08	0.03556683	-0.0084642945	-0.012032436	-1.1268078	0.0035398407	0.12975	79.0	996.4559943675995
269	-4.067713	1.5041263	-2.0555398	-7.047191	50.0	-0.8692676	1.0063857	-0.027484361	-6.086839	1080000	-1.9073486e-08	0.0386521	-0.0077135228	-0.012212617	-1.1339512	0.0019400987	0.06675	79.0	999.7578279972076
270	-4.0263586	1.4792219	-2.0660925	-6.89857	50.0	-0.84561926	0.97739	0.013104095	-6.109518	1084000	2.8133393e-08	0.039028764	-0.008784117	-0.015085252	-1.1427773	0.0034687158	0.15125	79.0	1002.9253194332123
271	-3.7219436	1.3342352	-1.8830692	-6.749198	50.0	-0.79262555	0.9034652	0.028971117	-5.8884807	1088000	2.6702882e-08	0.037772905	-0.0076904967	-0.01676445	-1.1489804	0.0016409173	0.1	79.0	1006.35875248909
272	-3.704635	1.3038511	-1.9731477	-7.1192107	50.0	-0.7934343	0.88423324	0.022623878	-5.9261103	1092000	2.861023e-09	0.039115097	-0.008324443	-0.011945635	-1.1570582	0.0044207233	0.11475	79.0	1009.7327229976654
273	-3.6260784	1.181545	-1.8368428	-6.6537027	50.0	-0.7765531	0.85675496	-0.0024648868	-5.848774	1096000	-1.525879e-08	0.037890334	-0.008082049	-0.010918109	-1.1639519	0.003660261	0.154	79.0	1013.1986384391785
274	-3.7320747	1.4855591	-1.692098	-6.7610493	50.0	-0.784942	0.9252731	0.018481048	-5.750571	1100000	-1.3828277e-08	0.029268844	-0.007248501	-0.009704234	-1.172083	0.0034993151	0.09	79.0	1016.6933462619781
275	-3.5495026	1.2396992	-1.9035912	-7.0343914	50.0	-0.72825986	0.85587794	-0.03713311	-5.9443974	1104000	-2.3841857e-09	0.027807023	-0.0075239656	-0.008925561	-1.1798719	0.0030796812	0.07525	79.0	1020.6046380996704
276	-3.7267647	1.4311539	-1.8854897	-6.7803836	50.0	-0.7662039	0.90873194	0.13478768	-5.9573374	1108000	2.9563903e-08	0.029416965	-0.009553997	-0.010501269	-1.1887459	0.003953549	0.12425	79.0	1023.8448083400726
277	-3.7584045	1.4758569	-1.7630415	-6.878217	50.0	-0.76739466	0.937208	-0.037907347	-5.8897133	1112000	5.0544738e-08	0.027759457	-0.008118481	-0.007862996	-1.1961782	0.0043319706	0.11375	79.0	1028.1587264537811
278	-3.31297	1.147329	-1.9082503	-6.894228	50.0	-0.6892534	0.7960682	-0.038365617	-5.8407016	1116000	-4.768372e-10	0.021611992	-0.007840327	-0.00613539	-1.2012264	0.003124746	0.10975	79.0	1031.4713859558105
279	-3.6121507	1.1989876	-1.8822135	-6.905362	50.0	-0.7269817	0.8589311	0.042233728	-5.9403453	1120000	2.861023e-09	0.026444284	-0.007991742	-0.0092934575	-1.2094669	0.004037746	0.10525	79.0	1034.7289922237396
280	-3.6080194	1.2997217	-1.7121397	-6.6726084	50.0	-0.72351414	0.888289	0.035099894	-6.0505185	1124000	-2.6702882e-08	0.025651572	-0.008284588	-0.010344583	-1.2194074	0.004604199	0.1295	79.0	1038.0242462158203
281	-3.6172836	1.3082236	-1.929007	-6.7942576	50.0	-0.7042226	0.8810237	0.041015048	-5.871283	1128000	1.3828277e-08	0.017546663	-0.0077053704	-0.00540163	-1.2263045	0.0027298052	0.09175	79.0	1041.6768951416016
282	-3.4671986	1.3247696	-1.7652311	-6.7411933	50.0	-0.6801714	0.8660599	0.06994804	-5.854268	1132000	-2.3841857e-09	0.02084562	-0.006555211	-0.0073333187	-1.2333257	0.000677781	0.0785	79.0	1045.3811566829681
283	-3.6858888	1.3099211	-1.885969	-6.630465	50.0	-0.7102972	0.88896734	-0.020099567	-5.736474	1136000	2.6702882e-08	0.018398026	-0.0074188625	-0.0051397784	-1.2403687	0.0033247138	0.08375	79.0	1049.8463776111603
284	-3.632936	1.3944569	-1.8167298	-6.7618017	50.0	-0.7169291	0.89234847	-0.014273649	-5.857038	1140000	-9.536743e-09	0.018268669	-0.007266119	-0.0047305487	-1.2477534	0.003112126	0.10975	79.0	1053.7076981067657
285	-3.5795708	1.3777605	-1.762222	-6.901697	50.0	-0.68855405	0.8729169	0.16542543	-5.971262	1144000	-2.4318695e-08	0.022327697	-0.007924244	-0.0065745134	-1.2542117	0.0045416863	0.096	79.0	1057.1970624923706
286	-3.690432	1.4042498	-1.7066151	-6.851521	50.0	-0.7178185	0.9072451	-0.042625286	-5.9118795	1148000	1.3828277e-08	0.022163982	-0.0069520962	-0.00949565	-1.2613779	0.0015854185	0.07875	79.0	1062.6264216899872
287	-3.2069612	1.2876287	-1.8403628	-6.398452	50.0	-0.6372413	0.7872363	-0.004294101	-5.6251445	1152000	-1.4305115e-09	0.01564098	-0.0077317613	-0.003740253	-1.2691846	0.0028612302	0.09075	79.0	1066.2409873008728
288	-3.4061515	1.4203467	-1.637142	-6.874437	50.0	-0.65154725	0.8465638	0.036307476	-5.8886724	1156000	2.193451e-08	0.023826664	-0.008982479	-0.007928645	-1.2775205	0.0021598623	0.10325	79.0	1069.4950988292694
289	-3.221904	1.2438377	-1.6382852	-6.5452	50.0	-0.64071923	0.7946571	-0.026177946	-5.9535174	1160000	6.198883e-09	0.019038007	-0.009246878	-0.007924524	-1.2862507	0.0024338379	0.09975	79.0	1072.9928965568542
290	-3.3683465	1.2541598	-1.8204482	-7.4161315	50.0	-0.63470703	0.8062927	-0.002699418	-5.6540403	1164000	-6.6757204e-09	0.02267411	-0.0076249666	-0.00959645	-1.2952226	0.0037529427	0.089	79.0	1076.4693460464478
291	-3.567553	1.2893515	-1.8310956	-6.8485184	50.0	-0.675396	0.8647736	0.05817403	-5.9964046	1168000	-1.7166137e-08	0.018502632	-0.0075471047	-0.006151489	-1.302084	0.0044630393	0.143	79.0	1080.2532722949982
292	-3.301796	1.3959466	-1.702982	-7.35345	50.0	-0.62972534	0.8314732	-0.005310433	-5.780903	1172000	6.103516e-08	0.018536743	-0.0078297565	-0.0068753287	-1.3079213	0.00064997806	0.064	79.0	1084.025629043579
293	-3.3169875	1.2677962	-1.7299063	-6.339501	50.0	-0.6200366	0.82254946	-0.012746403	-5.7144437	1176000	4.2438508e-08	0.016390909	-0.007900036	-0.0057981173	-1.3138428	0.004580341	0.0955	79.0	1087.9969782829285
294	-3.6562507	1.5541183	-1.6213539	-6.65823	50.0	-0.67334837	0.90047437	-0.019758612	-5.7865753	1180000	-1.4305114e-08	0.014360033	-0.0065411367	-0.005136436	-1.3229207	0.004252167	0.15	79.0	1091.5044379234314
295	-3.2422395	1.1799847	-1.7686526	-6.684298	50.0	-0.60476136	0.7993948	0.008132253	-5.8235044	1184000	3.576279e-08	0.016552322	-0.0069202734	-0.005828865	-1.3312895	0.0033929052	0.14175	79.0	1095.066555261612
296	-3.650016	1.531534	-1.7392535	-7.0892005	50.0	-0.6788666	0.92224693	-0.05949954	-5.8448544	1188000	-1.9073487e-09	0.015621146	-0.0072258064	-0.006561609	-1.3390666	0.003419283	0.08825	79.0	1098.6145889759064
297	-3.3565693	1.4283853	-1.6453961	-6.5199685	50.0	-0.6032257	0.83501434	-0.051948506	-5.7876973	1192000	-7.629395e-09	0.014815789	-0.009306442	-0.004671418	-1.3468626	0.002452712	0.0975	79.0	1102.218295097351
298	-3.5137706	1.3593175	-1.574338	-6.9396434	50.0	-0.65345997	0.85921323	-0.03567365	-5.7651033	1196000	-7.629395e-09	0.013019771	-0.0076525575	-0.0046791425	-1.3551079	0.0023740318	0.0865	79.0	1105.7279660701752
299	-3.343043	1.3438941	-1.727748	-6.613533	50.0	-0.6088333	0.84645563	-0.03343843	-5.70187	1200000	4.196167e-08	0.011456898	-0.0076679126	-0.0038335356	-1.3625181	0.0014753221	0.08175	79.0	1109.199336051941
300	-3.2429805	1.3109868	-1.6523833	-6.9380856	50.0	-0.57101333	0.7907468	-0.030948406	-5.6834025	1204000	-2.861023e-09	0.017362235	-0.008184928	-0.006055832	-1.3721111	0.0029533266	0.1255	79.0	1112.928644657135
301	-3.3552864	1.4180827	-1.5903809	-6.650921	50.0	-0.62927246	0.8445849	-0.015922235	-5.823737	1208000	-1.6212464e-08	0.016455991	-0.009731402	-0.0044814013	-1.3815726	0.0035044479	0.11	79.0	1116.9734013080597
302	-3.210959	1.16217	-1.6379665	-6.267116	50.0	-0.5982143	0.78301924	-0.014516715	-5.5797377	1212000	4.196167e-08	0.012568911	-0.0072326646	-0.004041682	-1.392058	0.0046296096	0.1125	79.0	1120.334838628769
303	-3.3226936	1.3852093	-1.6779609	-6.593389	50.0	-0.59148693	0.8370828	-0.035202093	-5.746546	1216000	1.3828277e-08	0.0123002175	-0.007926584	-0.0047676964	-1.3989356	0.0017965089	0.091	79.0	1123.7792873382568
304	-3.521553	1.3122146	-1.5449873	-6.5259914	50.0	-0.624562	0.8632279	0.035441335	-5.832956	1220000	-7.05719e-08	0.014555403	-0.008488635	-0.0038634362	-1.40652	0.003888728	0.1265	79.0	1128.7485282421112
305	-3.588325	1.5430218	-1.593992	-6.989802	50.0	-0.64954567	0.90435374	-0.046834063	-5.6290894	1224000	-4.673004e-08	0.014107498	-0.0075814426	-0.00584405	-1.4139758	0.003595554	0.10775	79.0	1131.866988658905
306	-3.1866355	1.404259	-1.4894651	-6.5559416	50.0	-0.56832784	0.8096391	0.0119041335	-5.8115993	1228000	-1.2397766e-08	0.012019545	-0.007648052	-0.0036707874	-1.4204928	0.0033909974	0.13325	79.0	1134.7648177146912
307	-3.1631725	1.2595797	-1.6495699	-6.6697335	50.0	-0.564814	0.7916304	-0.019727435	-5.646695	1232000	-1.9073486e-08	0.013553434	-0.008085123	-0.005350439	-1.427725	-7.95517e-05	0.0975	79.0	1139.4006099700928
308	-3.3551726	1.3863705	-1.703419	-6.6397247	50.0	-0.58278465	0.8291364	-0.030016517	-5.596539	1236000	2.6702882e-08	0.011386076	-0.0079450775	-0.0042528324	-1.4341573	0.004749735	0.08425	79.0	1142.8801460266113
309	-3.6675255	1.5517147	-1.5771574	-6.7534747	50.0	-0.6311782	0.9297588	-0.011937149	-5.6709223	1240000	-3.8146972e-08	0.010942166	-0.006848428	-0.0034307921	-1.4416208	0.0029872349	0.096	79.0	1146.4673404693604
310	-3.740785	1.6489426	-1.6334282	-6.7147636	50.0	-0.62799317	0.94206667	-0.032869488	-5.726507	1244000	-9.536744e-10	0.009772471	-0.007462511	-0.0024709427	-1.4505461	0.0029556102	0.1025	79.0	1149.8237583637238
311	-3.3358886	1.2958119	-1.6158245	-6.4752526	50.0	-0.57958263	0.8333788	0.041666202	-5.7617025	1248000	-2.5749207e-08	0.009139869	-0.0053706886	-0.0026088483	-1.4567964	0.0020220622	0.1085	79.0	1153.241694688797
312	-3.3724217	1.38072	-1.6364894	-6.620712	50.0	-0.5729149	0.8445052	-0.0033174474	-5.684464	1252000	-8.5830685e-09	0.007154358	-0.007321273	-0.0020335508	-1.4641452	0.0016433329	0.08575	79.0	1156.5191624164581
313	-3.1286538	1.2704145	-1.6644888	-6.392445	50.0	-0.5377489	0.779212	-0.014311347	-5.6666136	1256000	6.6757204e-09	0.009201495	-0.008016631	-0.0031020404	-1.4718299	0.0041259388	0.0995	79.0	1159.8397352695465
314	-3.436074	1.406688	-1.4989551	-6.422025	50.0	-0.58704734	0.8608758	0.019702746	-5.535749	1260000	3.051758e-08	0.009626067	-0.0069099204	-0.0031017126	-1.4791499	0.0019428189	0.137	79.0	1163.0773565769196
315	-3.0855784	1.2396623	-1.5094557	-6.3257933	50.0	-0.5127157	0.76420367	-0.002522871	-5.6172757	1264000	-1.9073486e-08	0.013672636	-0.00862594	-0.006575853	-1.4845164	0.004169659	0.119	79.0	1166.4233281612396
316	-3.114832	1.2572862	-1.5011715	-6.283262	50.0	-0.5341505	0.7944625	0.021424366	-5.442877	1268000	-1.66893e-08	0.010882916	-0.007897959	-0.0055012587	-1.4912479	0.0031706395	0.09375	79.0	1169.8109529018402
317	-3.1193333	1.3015218	-1.5804214	-6.54858	50.0	-0.532201	0.771629	-0.00652929	-5.4878674	1272000	-9.536744e-10	0.011280212	-0.009382201	-0.0044326927	-1.4992992	0.0060397293	0.143	79.0	1173.3598256111145
318	-3.4085898	1.567722	-1.5910951	-6.558399	50.0	-0.5998064	0.89125717	-0.0006841067	-5.650222	1276000	-1.7166137e-08	0.009474261	-0.008198938	-0.0035058237	-1.5070035	0.0023546058	0.08225	79.0	1176.8992431163788
319	-3.269254	1.4226583	-1.3734646	-6.4818316	50.0	-0.5454876	0.8344465	-0.02016	-5.5920615	1280000	1.7166137e-08	0.009512727	-0.008970136	-0.003332362	-1.5144043	0.0018659121	0.121	79.0	1180.5047631263733
320	-3.3053124	1.2828718	-1.5518837	-6.1897974	50.0	-0.55114275	0.814967	-0.0047152415	-5.3656564	1284000	3.33786e-08	0.012154549	-0.0068885307	-0.0046343845	-1.5232086	0.0057487967	0.157	79.0	1184.023413181305
321	-2.8450167	1.3847699	-1.4874583	-6.4658575	50.0	-0.47745764	0.7417078	-0.022130132	-5.5949097	1288000	-4.196167e-08	0.008118708	-0.004739605	-0.002935043	-1.5283926	0.0035498627	0.1785	79.0	1187.7502286434174
322	-2.9900806	1.3566943	-1.5019298	-6.287032	50.0	-0.5061089	0.76636386	-0.016378261	-5.586966	1292000	0.0	0.0102216685	-0.008180951	-0.0044954172	-1.5351475	0.001530819	0.0875	79.0	1190.8920812606812
323	-3.2093265	1.2297579	-1.4802189	-6.44819	50.0	-0.5267604	0.7972381	-0.02688971	-5.5880313	1296000	-3.242493e-08	0.010490066	-0.00722104	-0.003576025	-1.543369	0.0028439707	0.128	79.0	1194.1219685077667
324	-3.1448255	1.2976294	-1.592442	-6.2390018	50.0	-0.52429694	0.79056394	-0.029227277	-5.4902716	1300000	6.6757204e-09	0.0078936955	-0.008577591	-0.002091037	-1.5504502	0.003917307	0.08975	79.0	1197.3425579071045
325	-3.1762555	1.2763304	-1.4404764	-6.349157	50.0	-0.5239034	0.78829485	-0.026627606	-5.4139256	1304000	-2.3841858e-08	0.00588198	-0.006568246	-0.0018310323	-1.5584065	0.002729416	0.119	79.0	1200.665094614029
326	-3.0967245	1.2044787	-1.5213848	-6.2279267	50.0	-0.5083731	0.77450323	-0.015960246	-5.45598	1308000	4.7683715e-09	0.0070899255	-0.008267503	-0.001807583	-1.5647935	0.001795006	0.10425	79.0	1203.8671100139618
327	-3.0574794	1.2550784	-1.4530728	-6.372001	50.0	-0.5052411	0.77018344	-0.017631833	-5.500579	1312000	-2.7656554e-08	0.0060384953	-0.0074118054	-0.001674246	-1.5717925	0.0019083065	0.13075	79.0	1208.2765707969666
328	-2.9720492	1.2604151	-1.477354	-6.439559	50.0	-0.47730884	0.74786717	0.028740639	-5.457829	1316000	3.8146972e-08	0.0074499734	-0.007544178	-0.0027044332	-1.5791255	0.0029923732	0.1065	79.0	1211.7468655109406
329	-3.229425	1.3206034	-1.4065229	-6.232325	50.0	-0.5285582	0.811413	0.005027039	-5.500259	1320000	5.8174134e-08	0.0070488313	-0.009024865	-0.00199612	-1.5858908	0.0025073977	0.12225	79.0	1215.1138796806335
330	-3.1604588	1.2874541	-1.4508402	-6.5821548	50.0	-0.5175318	0.79982156	-0.0095796045	-5.5256205	1324000	-3.4332274e-08	0.0073140766	-0.008169303	-0.00227921	-1.5926353	0.0013529952	0.10975	79.0	1218.3527162075043
331	-3.2229753	1.5454394	-1.3922647	-6.373757	50.0	-0.5120449	0.83044046	-0.01350701	-5.539621	1328000	-6.6757204e-09	0.008008853	-0.007327228	-0.0026157205	-1.6006768	0.0024232191	0.09175	79.0	1221.6131637096405
332	-3.1683946	1.5228938	-1.4718648	-6.2131906	50.0	-0.5226073	0.83052206	-0.029957334	-5.572307	1332000	-4.005432e-08	0.0065339818	-0.008584812	-0.0023038094	-1.6084238	0.0031937924	0.108	79.0	1224.7903881072998
333	-3.2160294	1.3490566	-1.4383298	-6.5087485	50.0	-0.5078042	0.81157005	0.07391879	-5.4033165	1336000	1.4305114e-08	0.005718937	-0.0067122164	-0.0019381081	-1.6162214	0.0030438881	0.09475	79.0	1227.9477367401123
334	-3.0479894	1.2320739	-1.3634661	-6.3490505	50.0	-0.48947653	0.77250797	0.00091789104	-5.4803863	1340000	-1.9073486e-08	0.004694898	-0.007850116	-0.0012584659	-1.62494	0.0032253976	0.09325	79.0	1231.1445441246033
335	-3.3242078	1.4729062	-1.4229621	-6.2997465	50.0	-0.5342926	0.85337466	-0.015303446	-5.589997	1344000	-1.9073486e-08	0.0044907765	-0.00609254	-0.0011183114	-1.6330353	0.002716582	0.11025	79.0	1234.2504496574402
336	-3.1420555	1.4244986	-1.4278561	-6.3257356	50.0	-0.50162435	0.8037766	0.0060521103	-5.52346	1348000	-4.7683717e-08	0.0050546597	-0.008821115	-0.001426925	-1.6395159	0.00404995	0.116	79.0	1237.4104249477386
337	-3.0227857	1.2653356	-1.3728691	-5.956036	50.0	-0.48115015	0.76391125	-0.001073407	-5.2288437	1352000	2.9563903e-08	0.00658326	-0.006650993	-0.0016202601	-1.6466417	0.0033586586	0.14325	79.0	1240.664591550827
338	-3.129482	1.4320383	-1.4086152	-6.2330985	50.0	-0.4987909	0.8081672	-0.016401073	-5.4618263	1356000	-6.008148e-08	0.0054936963	-0.008836849	-0.0021711204	-1.6537479	0.005710135	0.11275	79.0	1243.927216053009
339	-3.1855087	1.4087647	-1.333373	-6.208943	50.0	-0.4968664	0.812777	0.013061425	-5.3868747	1360000	-3.6239623e-08	0.006071851	-0.007805475	-0.0021423032	-1.6630292	0.003659043	0.118	79.0	1247.132800102234
340	-3.0399313	1.2275633	-1.4900494	-6.300367	50.0	-0.4766207	0.7602696	-0.012633057	-5.539779	1364000	-8.5830685e-09	0.0055505685	-0.008017977	-0.002223546	-1.6715742	0.002851807	0.13875	79.0	1250.797482252121
341	-3.0427244	1.3231972	-1.4722233	-6.164668	50.0	-0.48518208	0.7824907	-0.009411812	-5.310099	1368000	2.8610229e-08	0.008210173	-0.0061259833	-0.0044621266	-1.676489	0.0041459794	0.144	79.0	1254.673954486847
342	-2.9021604	1.1891193	-1.361717	-5.939129	50.0	-0.46332484	0.7373733	-0.02017962	-5.2443414	1372000	-8.869171e-08	0.004824147	-0.0076010018	-0.0014167635	-1.6816894	0.0027847132	0.07825	79.0	1258.4562575817108
343	-3.304235	1.5219611	-1.3435855	-6.451665	50.0	-0.50741476	0.85201436	-0.014460769	-5.597467	1376000	-3.71933e-08	0.005438927	-0.0076389615	-0.0015855187	-1.6900017	0.002380417	0.095	79.0	1262.4559786319733
344	-3.248912	1.2302992	-1.446459	-6.027515	50.0	-0.49181935	0.8032908	-0.007997036	-5.3916	1380000	-4.9591065e-08	0.0044121267	-0.006437334	-0.0011021369	-1.6956483	0.0026234502	0.1165	79.0	1266.2663378715515
345	-3.2066414	1.4204925	-1.3843864	-6.2839494	50.0	-0.49418426	0.82435906	-0.012944626	-5.4507585	1384000	-4.7683715e-09	0.005427249	-0.0073225824	-0.0021054612	-1.7025181	0.0040997206	0.10225	79.0	1270.0694761276245
346	-3.1797671	1.3522007	-1.4867986	-6.0678296	50.0	-0.4873895	0.8137249	-0.0033393241	-5.4009323	1388000	-3.242493e-08	0.00411502	-0.008021437	-0.0011347779	-1.70683	0.004224633	0.10925	79.0	1273.7851073741913
347	-3.1816144	1.4759394	-1.330084	-6.287596	50.0	-0.47792083	0.81910545	-1.7579645e-05	-5.385844	1392000	-8.5830685e-09	0.0045704986	-0.008339557	-0.0009800252	-1.7140353	0.002020735	0.16025	79.0	1277.4446716308594
348	-3.0615914	1.3253325	-1.3093728	-6.281782	50.0	-0.4706063	0.7851843	-0.0053394865	-5.468114	1396000	2.861023e-09	0.0057362476	-0.008635924	-0.0019941463	-1.7213134	0.0009498861	0.15225	79.0	1281.1853466033936
349	-2.8726795	1.1746467	-1.3958839	-6.0726047	50.0	-0.4347815	0.72198933	-0.0074045323	-5.318553	1400000	3.1471252e-08	0.0039690556	-0.008322842	-0.001175548	-1.7275094	0.004658238	0.1715	79.0	1284.9270055294037
350	-3.0534296	1.4450855	-1.3626174	-6.187119	50.0	-0.47174838	0.798969	-0.015057037	-5.3919125	1404000	7.5340274e-08	0.0034120658	-0.009023709	-0.00095922756	-1.7358402	0.0040863045	0.12875	79.0	1288.4664068222046
351	-3.110061	1.3949968	-1.3749299	-6.302115	50.0	-0.4743202	0.7972686	0.0048756674	-5.463451	1408000	6.2942505e-08	0.0051145894	-0.007707999	-0.0013582637	-1.7442977	0.0037942142	0.14	79.0	1292.1948158740997
352	-2.830441	1.2941153	-1.4556816	-6.055848	50.0	-0.44783458	0.7367942	0.0062791817	-5.2546105	1412000	2.002716e-08	0.0043086605	-0.007787716	-0.0013576224	-1.7543598	0.0030100055	0.1025	79.0	1297.030511379242
353	-2.8532984	1.4625705	-1.3769486	-6.280714	50.0	-0.44214118	0.7580966	-0.0017894544	-5.4812207	1416000	4.673004e-08	0.0031615908	-0.006497466	-0.0008547858	-1.761553	0.004004836	0.06225	79.0	1300.8611197471619
354	-2.9580286	1.374228	-1.2984015	-6.2333293	50.0	-0.45082682	0.76674134	-0.0074103028	-5.4524865	1420000	-5.0544738e-08	0.0041135564	-0.005774063	-0.0012043938	-1.768208	0.0026561045	0.12125	79.0	1304.1035861968994
355	-2.9368696	1.4072504	-1.3126973	-6.179721	50.0	-0.44382706	0.7679692	0.009896463	-5.395397	1424000	-3.8146974e-09	0.003942745	-0.0080065215	-0.00104223	-1.7756053	0.0037834244	0.12625	79.0	1307.6034858226776
356	-3.1649647	1.4525832	-1.3464766	-6.2415786	50.0	-0.4839536	0.8223215	0.0013889819	-5.39194	1428000	5.722046e-09	0.0034870696	-0.007953779	-0.0008278908	-1.7822462	0.0016988993	0.08475	79.0	1311.0370833873749
357	-2.8835335	1.2557088	-1.364011	-5.9760604	50.0	-0.4395717	0.74857444	-0.0043541193	-5.280698	1432000	-5.722046e-09	0.002911943	-0.0066109495	-0.000609708	-1.7912402	0.0022717004	0.0835	79.0	1314.2639651298523
358	-3.1951811	1.4821165	-1.3528569	-6.1153984	50.0	-0.50072044	0.832425	-0.010142429	-5.393933	1436000	-1.1444092e-08	0.0040812884	-0.00797967	-0.0013764668	-1.7985501	0.0033111447	0.15925	79.0	1317.479885816574
359	-3.0563674	1.4962548	-1.3614508	-6.1577764	50.0	-0.4549674	0.805198	-0.002180526	-5.4274626	1440000	-7.629395e-09	0.0042623812	-0.0070562745	-0.0013395597	-1.8049805	0.0026939113	0.05975	79.0	1321.1022861003876
360	-2.8665738	1.3367178	-1.2697527	-5.9597907	50.0	-0.436222	0.74771255	0.0085364245	-5.3697643	1444000	-1.9073486e-08	0.0030978885	-0.006162736	-0.00053863274	-1.813568	0.0026741284	0.0975	79.0	1324.81698513031
361	-3.0945601	1.4408535	-1.2826924	-6.1075964	50.0	-0.47405955	0.8118183	-0.008803904	-5.3523636	1448000	-2.7656554e-08	0.004157923	-0.008506836	-0.0010654267	-1.8203881	0.0049022147	0.1295	79.0	1328.9888081550598
362	-2.909061	1.2429794	-1.383551	-6.191797	50.0	-0.43308386	0.7508035	-0.0031655524	-5.295622	1452000	-8.583069e-08	0.0029517952	-0.006380393	-0.0009423711	-1.8249531	0.0026389165	0.10425	79.0	1332.8330018520355
363	-3.164825	1.4098612	-1.3360734	-6.1721697	50.0	-0.4611217	0.8096141	-0.0022883173	-5.3439655	1456000	5.531311e-08	0.00411231	-0.008008314	-0.0009913768	-1.8313797	0.006932341	0.2015	79.0	1336.5796172618866
364	-2.915055	1.3518249	-1.3103402	-6.206072	50.0	-0.43937293	0.7655091	-0.00804859	-5.3958707	1460000	-2.7656554e-08	0.00469616	-0.007799681	-0.0015445091	-1.8385434	0.0029797289	0.15825	79.0	1343.0285873413086
365	-2.9604886	1.4246804	-1.3858086	-6.1246457	50.0	-0.4529575	0.77592474	-0.0018980447	-5.4398303	1464000	3.8146974e-09	0.0044599734	-0.006248022	-0.0015514647	-1.8450544	0.0037319865	0.13475	79.0	1347.8288190364838
366	-2.928519	1.2878909	-1.2783706	-6.187691	50.0	-0.43433556	0.75882643	0.00089562126	-5.3702345	1468000	0.0	0.0030169538	-0.008593284	-0.000784694	-1.8511671	0.0034154777	0.11475	79.0	1351.8257703781128
367	-2.982003	1.2889783	-1.3527687	-6.0470066	50.0	-0.44365212	0.76665837	-0.005148057	-5.3360224	1472000	-2.4795533e-08	0.0033599788	-0.007891939	-0.0010178993	-1.8588532	0.0027512936	0.12625	79.0	1355.3022797107697
368	-2.9486935	1.3045489	-1.3042977	-6.0791783	50.0	-0.44019258	0.7657434	0.0011810176	-5.378358	1476000	2.861023e-09	0.003553072	-0.006904914	-0.0010771716	-1.8658898	0.001981276	0.132	79.0	1358.5436403751373
369	-2.931665	1.3436146	-1.3367095	-6.1474423	50.0	-0.43597376	0.76393074	0.0031099115	-5.357838	1480000	1.7166137e-08	0.0048350412	-0.0076791113	-0.0016794375	-1.8735801	0.004135145	0.11625	79.0	1361.8323645591736
370	-2.9564083	1.1840377	-1.311594	-5.9655986	50.0	-0.443645	0.747908	-0.0002747234	-5.205512	1484000	-1.039505e-07	0.00409405	-0.0056140833	-0.0015600661	-1.8797712	0.0021963215	0.1255	79.0	1365.1391518115997
371	-2.872007	1.2699656	-1.289191	-6.125731	50.0	-0.43297687	0.75162846	0.0027828664	-5.3771653	1488000	2.5749207e-08	0.0030501613	-0.0069959047	-0.0008324899	-1.885861	0.0021835587	0.1605	79.0	1368.3335528373718
372	-2.8752086	1.1779914	-1.3536545	-5.7296658	50.0	-0.42250675	0.73559856	0.022292873	-5.00291	1492000	-4.196167e-08	0.002168967	-0.008866565	-0.0004740971	-1.8930769	-0.00047265444	0.11125	79.0	1371.5867309570312
373	-2.8977742	1.1783156	-1.3586006	-6.145123	50.0	-0.4223281	0.73812455	-0.0015576519	-5.3208084	1496000	5.722046e-09	0.0023583993	-0.0068314667	-0.00031897728	-1.9029876	0.0041076452	0.134	79.0	1380.5945007801056
374	-2.9809258	1.3628472	-1.3492042	-6.1341667	50.0	-0.4418003	0.76996267	-0.0019529574	-5.345582	1500000	3.8146974e-09	0.004052732	-0.008028958	-0.0012871728	-1.9086611	0.0056371554	0.1265	79.0	1385.9079813957214
375	-3.084929	1.4933114	-1.2855245	-6.171458	50.0	-0.45457992	0.83108646	-0.0042412262	-5.338936	1504000	-3.1471252e-08	0.0040511815	-0.007465327	-0.001510584	-1.9166601	0.0032925156	0.10625	79.0	1390.1602647304535
376	-2.837092	1.1551809	-1.3039632	-5.9297743	50.0	-0.4074179	0.71267724	-0.007638909	-4.994271	1508000	4.1007997e-08	0.0034296778	-0.007964923	-0.0010740915	-1.923294	0.004146308	0.17175	79.0	1393.5820286273956
377	-3.0047998	1.4614431	-1.250843	-6.153566	50.0	-0.44415808	0.8005269	0.00039866567	-5.4944735	1512000	-7.152558e-08	0.0037283655	-0.0071745347	-0.00078635826	-1.9288516	0.0052006925	0.13325	79.0	1397.047623872757
378	-2.6850479	1.2337866	-1.319783	-5.8370967	50.0	-0.39316824	0.69583976	-0.0023020115	-5.1068535	1516000	-2.9563903e-08	0.00236546	-0.0071855537	-0.00050497043	-1.9339442	0.0023552985	0.127	79.0	1401.235291481018
379	-3.0093071	1.3550953	-1.5130847	-6.2042027	50.0	-0.440193	0.7832986	-0.00092183053	-5.390062	1520000	0.0	0.0027195553	-0.0050602066	-0.0007132427	-1.940757	0.0038969677	0.11325	79.0	1404.6290917396545
380	-2.8301551	1.3810157	-1.267148	-6.160898	50.0	-0.40874597	0.74810606	-0.0016235709	-5.399554	1524000	3.242493e-08	0.002219778	-0.0081247995	-0.0003674099	-1.9434091	0.0034592408	0.1055	79.0	1407.8480913639069
381	-3.122584	1.5002133	-1.3076354	-6.1262765	50.0	-0.45320776	0.8233277	-0.00023128651	-5.392137	1528000	-3.4332274e-08	0.0032610483	-0.0063954713	-0.0007089968	-1.9514	0.003327624	0.1325	79.0	1411.0877873897552
382	-2.7815576	1.3484544	-1.2908736	-5.9193997	50.0	-0.407737	0.73436534	-0.007995684	-5.192714	1532000	3.8146974e-09	0.0027423427	-0.00808409	-0.00077196024	-1.9575118	0.0025943338	0.10775	79.0	1414.3169281482697
383	-2.8009143	1.4083178	-1.2615422	-5.8656006	50.0	-0.40911755	0.75177705	0.0023922399	-5.2309246	1536000	2.2888184e-08	0.0031189148	-0.007361494	-0.00090492866	-1.9620018	0.0039069303	0.103	79.0	1417.5771565437317
384	-2.738969	1.2380011	-1.2683326	-6.162943	50.0	-0.3973295	0.714283	0.003185179	-5.290253	1540000	2.2888184e-08	0.0032561682	-0.0062533044	-0.0010824008	-1.9690583	0.0009058836	0.11	79.0	1422.1622388362885
385	-2.980728	1.4266323	-1.296422	-6.3097034	50.0	-0.42819545	0.7802072	0.010362318	-5.389604	1544000	2.6702882e-08	0.0033106785	-0.007248821	-0.0007967714	-1.9763151	0.0025517687	0.107	79.0	1426.1799812316895
386	-3.04394	1.4739621	-1.2983603	-6.1355567	50.0	-0.44103816	0.8093522	0.013232473	-5.4301653	1548000	3.528595e-08	0.004235794	-0.0067923586	-0.0016557481	-1.9817439	0.006293679	0.22925	79.0	1429.7835295200348
387	-3.015428	1.267741	-1.3776858	-6.021031	50.0	-0.43085626	0.7735741	0.014347959	-5.3208632	1552000	-1.8119811e-08	0.0032314584	-0.008308998	-0.0008239534	-1.9857361	0.0025980524	0.1535	79.0	1433.8126456737518
388	-2.7383204	1.3708276	-1.3800942	-6.0043807	50.0	-0.40401813	0.731876	0.00069034845	-5.1889	1556000	5.7220458e-08	0.0038519402	-0.006418293	-0.0012954341	-1.9930495	0.0018881118	0.11175	79.0	1439.181542634964
389	-2.844711	1.2399074	-1.3158997	-5.7427816	50.0	-0.40447193	0.7330724	0.02605052	-5.1321836	1560000	-5.722046e-09	0.0025381567	-0.005712867	-0.00063603045	-1.9990884	0.005152912	0.19125	79.0	1443.088235616684
390	-3.1003475	1.3169023	-1.4326373	-6.102646	50.0	-0.45045337	0.7998046	0.0014448278	-5.3155737	1564000	7.43866e-08	0.002299356	-0.0064137573	-0.0003627973	-2.007128	0.0033101481	0.12725	79.0	1447.1305480003357
391	-3.0146172	1.3431572	-1.3042177	-6.116294	50.0	-0.4227795	0.77734274	-0.0029113777	-5.3062053	1568000	5.722046e-09	0.0030750341	-0.0076851593	-0.0007923343	-2.0125542	0.0030030648	0.12125	79.0	1451.5983545780182
392	-2.6595204	1.1635786	-1.3124552	-5.704937	50.0	-0.38290474	0.69250476	-0.004092714	-5.1237574	1572000	-4.9591065e-08	0.0022422413	-0.007788667	-0.00049878017	-2.018292	0.0013577602	0.163	79.0	1455.0013694763184
393	-3.0345187	1.3523597	-1.246997	-6.0221434	50.0	-0.43397135	0.78661764	-0.0024969187	-5.237008	1576000	3.051758e-08	0.0031516645	-0.0076383906	-0.0007639893	-2.02751	0.0054907515	0.1395	79.0	1460.0663318634033
394	-2.9636264	1.1706933	-1.3291099	-6.133461	50.0	-0.41608113	0.7496253	-0.00463056	-5.3469086	1580000	-2.2888184e-08	0.0025388438	-0.0035255528	-0.00045996252	-2.0311887	0.0049349326	0.1665	79.0	1463.5418577194214
395	-3.0314295	1.4960378	-1.3543837	-6.230917	50.0	-0.43102697	0.8097285	-0.005549062	-5.361285	1584000	5.531311e-08	0.0024814045	-0.006494544	-0.00045208097	-2.0389435	0.006170709	0.17525	79.0	1467.23894405365
396	-2.8843641	1.3180472	-1.2899921	-6.098888	50.0	-0.41354877	0.7538932	-0.004847275	-5.368857	1588000	3.6239623e-08	0.0026490667	-0.0060338764	-0.00053376425	-2.0452	0.0029120913	0.1495	79.0	1475.9117822647095
397	-3.1253457	1.4261954	-1.2509924	-6.080213	50.0	-0.44830066	0.8193689	0.014912337	-5.2710996	1592000	-1.2397766e-07	0.0025910053	-0.006325636	-0.00046357	-2.049341	0.002713699	0.112	79.0	1479.7838225364685
398	-3.081725	1.6074637	-1.2598209	-6.1487164	50.0	-0.4463916	0.840523	-0.004545089	-5.3941383	1596000	-2.6702882e-08	0.002671087	-0.0056390488	-0.00048743957	-2.055877	0.0056867166	0.13475	79.0	1488.3466629981995
399	-2.8669674	1.2184452	-1.2496808	-6.1124187	50.0	-0.40548807	0.7383598	0.016685303	-5.4226236	1600000	1.1062622e-07	0.0025696782	-0.0055323155	-0.0005353673	-2.0609784	0.005249522	0.25425	79.0	1491.63654088974
400	-2.849696	1.2289506	-1.3078794	-6.024169	50.0	-0.4128442	0.74299777	0.0018149801	-5.2833104	1604000	5.722046e-09	0.0023460796	-0.007417466	-0.00051093823	-2.0665221	0.0032286076	0.22	79.0	1495.6456320285797
401	-2.959663	1.3385414	-1.3019141	-5.951614	50.0	-0.41577187	0.7704582	0.0007125549	-5.190839	1608000	4.005432e-08	0.00219372	-0.0066316966	-0.0002596724	-2.0742793	0.002517063	0.125	79.0	1499.1553606987
402	-2.6219127	1.2604111	-1.2864096	-6.06698	50.0	-0.3735993	0.6928971	-0.0026858523	-5.316447	1612000	-3.33786e-08	0.0017732027	-0.006723129	-0.00034691778	-2.0799723	0.0019025397	0.11625	79.0	1502.9182658195496
403	-2.8493867	1.2256966	-1.2611456	-6.074084	50.0	-0.38883427	0.7233142	0.0006933771	-5.1031637	1616000	1.1444092e-08	0.0022917578	-0.005628666	-0.00036430324	-2.0893433	0.005612358	0.16725	79.0	1506.598389863968
404	-3.114214	1.4976603	-1.3327721	-6.058403	50.0	-0.4403591	0.82730544	-0.0034898296	-5.391425	1620000	-5.9127807e-08	0.0026376122	-0.005009159	-0.00041851983	-2.0973818	0.003046757	0.143	79.0	1510.210309267044
405	-2.8351896	1.3043598	-1.3081282	-6.079407	50.0	-0.40608636	0.74420434	-0.0032010172	-5.250184	1624000	-7.629395e-09	0.002126654	-0.008744775	-0.00036365783	-2.102798	0.0041234544	0.11075	79.0	1513.8820383548737
406	-3.1433194	1.556084	-1.2913127	-6.165702	50.0	-0.44686803	0.83953375	0.0071278773	-5.355432	1628000	-9.1552735e-08	0.0025863952	-0.0068786372	-0.00042939652	-2.1115382	0.0014211008	0.12375	79.0	1517.3886682987213
407	-2.7544034	1.2135576	-1.2679344	-6.09093	50.0	-0.3852481	0.71540564	0.00066748634	-5.3521576	1632000	3.8146974e-09	0.0017945403	-0.0058206366	-0.00020403974	-2.1173017	0.0023464558	0.1045	79.0	1520.9239897727966
408	-2.8947098	1.3916802	-1.3535038	-6.160244	50.0	-0.40216747	0.7620061	0.0027539264	-5.3350334	1636000	-7.629395e-09	0.002953422	-0.00786908	-0.0006996356	-2.12533	0.0050193365	0.1595	79.0	1526.3612895011902
409	-2.7726548	1.2750268	-1.3664399	-6.2997384	50.0	-0.39841834	0.7321286	-0.0021222048	-5.3739967	1640000	-6.484986e-08	0.0021907876	-0.008371024	-0.000533154	-2.1337411	0.0028034945	0.13825	79.0	1530.2530159950256
410	-2.7765603	1.2208229	-1.243043	-5.954515	50.0	-0.37975445	0.7124476	-0.0046491567	-5.112421	1644000	4.386902e-08	0.002794747	-0.006981082	-0.00076068006	-2.1402783	0.0023242764	0.15225	79.0	1533.7511925697327
411	-2.9036543	1.3306005	-1.2862352	-6.084778	50.0	-0.40672255	0.7622794	0.008299723	-5.3878555	1648000	-2.8610229e-08	0.002443791	-0.00540611	-0.00068934704	-2.1466835	0.0015386444	0.12975	79.0	1537.4625856876373
412	-2.5802727	1.2374753	-1.2201673	-5.9616647	50.0	-0.3593972	0.6835211	0.0014096051	-5.242944	1652000	-2.9563903e-08	0.0018957662	-0.0071167005	-0.00036541582	-2.1523378	0.005385908	0.1935	79.0	1540.8657183647156
413	-2.7298758	1.477759	-1.2729285	-6.0489182	50.0	-0.3843063	0.7461751	0.007926263	-5.3185215	1656000	5.3405763e-08	0.0019331529	-0.0060839453	-0.00029935164	-2.154297	0.0039042933	0.1255	79.0	1544.2132320404053
414	-3.0311086	1.3745382	-1.2652606	-5.9723406	50.0	-0.42742968	0.795518	0.0059469696	-5.2405505	1660000	9.441376e-08	0.002687746	-0.0062323445	-0.00057046604	-2.15675	0.001611642	0.16925	79.0	1547.878877401352
415	-2.914522	1.4926877	-1.249636	-6.10325	50.0	-0.4069245	0.78161573	0.0023137499	-5.273624	1664000	-9.536743e-08	0.0021331334	-0.0064372746	-0.00032406335	-2.1625035	0.0016622979	0.12525	79.0	1551.3290355205536
416	-2.9739559	1.3925438	-1.1831962	-6.0771775	50.0	-0.41453856	0.7787199	0.00504604	-5.3278112	1668000	1.7166137e-08	0.0022721894	-0.0055107167	-0.0003206171	-2.1697054	0.00406963	0.183	79.0	1554.9927804470062
417	-3.0926373	1.3809822	-1.2587099	-6.07539	50.0	-0.4280232	0.8067804	-0.001922207	-5.37982	1672000	-1.04904174e-07	0.0021580548	-0.0068643074	-0.0002584249	-2.176772	0.00247436	0.11175	79.0	1558.6191895008087
418	-3.1489146	1.4577894	-1.2861725	-6.102897	50.0	-0.43469286	0.8253455	0.00084004924	-5.2933793	1676000	-9.727478e-08	0.0023428143	-0.007073552	-0.0002644523	-2.184864	0.001452725	0.12925	79.0	1562.3652353286743
419	-2.872501	1.4910368	-1.192453	-6.130262	50.0	-0.40110615	0.77510625	0.0012530293	-5.3268886	1680000	8.392334e-08	0.0021578264	-0.0066169593	-0.00028103788	-2.1886895	0.004556224	0.12375	79.0	1566.0982525348663
420	-2.9490252	1.4622291	-1.1894873	-6.292081	50.0	-0.40649456	0.78329015	0.0013294425	-5.306549	1684000	5.531311e-08	0.0023090963	-0.0051412964	-0.00031545106	-2.1933565	0.004763539	0.18	79.0	1570.1011757850647
421	-3.0879745	1.481692	-1.2310418	-6.1299605	50.0	-0.4265927	0.8175733	-0.0014942922	-5.6232824	1688000	9.536743e-09	0.0024062113	-0.0038546477	-0.00034921546	-2.2012863	0.0030385915	0.19375	79.0	1573.4380512237549
422	-2.9861968	1.2474513	-1.3681074	-6.1048207	50.0	-0.40777373	0.7637875	0.004900595	-5.323692	1692000	8.010864e-08	0.0021472431	-0.007148342	-0.0003410607	-2.2073383	0.0024079825	0.15975	79.0	1576.6189897060394
423	-3.194991	1.6007752	-1.258862	-6.216443	50.0	-0.4442187	0.8564562	0.0056520663	-5.3473763	1696000	-5.1498414e-08	0.0023675922	-0.005299379	-0.0003787137	-2.2156816	0.0044993493	0.14225	79.0	1579.8236589431763
424	-2.946459	1.3827074	-1.2511646	-6.0864806	50.0	-0.40484953	0.77483416	0.00014396384	-5.4301505	1700000	1.3351441e-08	0.0021136506	-0.006635525	-0.00028813735	-2.2224329	0.004631194	0.15325	79.0	1583.0226533412933
425	-3.2784188	1.5291284	-1.2525744	-6.1457696	50.0	-0.45181096	0.8567029	2.9038638e-06	-5.329842	1704000	-4.386902e-08	0.002516656	-0.0050884103	-0.0002601575	-2.2296448	0.0032454343	0.16025	79.0	1591.1905570030212
426	-2.8234177	1.4260038	-1.2273396	-6.1648235	50.0	-0.39300066	0.7591474	0.0016704183	-5.3732133	1708000	0.0	0.0019410183	-0.004727472	-0.0003123792	-2.2364025	0.002498027	0.14775	79.0	1596.4393899440765
427	-2.7292912	1.1953442	-1.346638	-5.8392706	50.0	-0.37185472	0.7049181	-0.002321599	-5.1728797	1712000	3.6239623e-08	0.0019019232	-0.0062549803	-0.00029892055	-2.2391725	0.0015087368	0.141	79.0	1600.1978096961975
428	-2.9826	1.4007833	-1.2993606	-6.0457916	50.0	-0.40212616	0.78048044	-1.3973564e-05	-5.2270813	1716000	7.8201296e-08	0.0022433545	-0.006349015	-0.0003295081	-2.2460127	0.0045472058	0.13075	79.0	1603.6330652236938
429	-2.9650083	1.4021568	-1.2335238	-5.855095	50.0	-0.4028164	0.7788593	-0.0037124846	-5.138129	1720000	7.43866e-08	0.0020755548	-0.0061167204	-0.00021514331	-2.2523427	0.0041169347	0.14475	79.0	1607.4160206317902
430	-2.9683824	1.5160524	-1.2542393	-6.0839396	50.0	-0.40707457	0.7968631	0.0022394024	-5.3336363	1724000	7.724762e-08	0.0020900143	-0.006713523	-0.00032375194	-2.2588394	0.0024356283	0.13475	79.0	1610.9914083480835
431	-2.6992784	1.2363092	-1.1820276	-5.870014	50.0	-0.36575708	0.70889187	0.0015098434	-5.173546	1728000	2.0980835e-08	0.0023732549	0.008241945	-0.0007100032	-2.2631838	0.016800487	0.44425	28.0	1614.1763393878937
432	-2.819099	1.229606	-1.2566408	-5.747675	50.0	-0.38151634	0.72750694	0.0106485635	-4.99545	1732000	7.629395e-09	0.0021784648	0.009941311	-0.0005092138	-2.2648787	0.01843779	0.47025	5.0	1617.1763956546783
433	-2.7727213	1.5363201	-1.238332	-6.1337223	50.0	-0.38150585	0.7591774	0.0037698727	-5.208116	1736000	5.722046e-09	0.0024557158	0.004934517	-0.0006671377	-2.2652996	0.01801976	0.3525	2.0	1620.1084814071655
434	-2.7153125	1.3718144	-1.2553824	-6.1236925	50.0	-0.36648107	0.7247124	0.0070435423	-5.374937	1740000	1.3351441e-08	0.0018427125	0.011411343	-0.00027806102	-2.2655048	0.017677894	0.38875	1.0	1623.0642924308777
435	-2.637478	1.3417346	-1.1960607	-6.0803924	50.0	-0.35603297	0.70947117	0.0070348307	-5.296075	1744000	-5.7220458e-08	0.0016741386	-0.0068374365	-0.00021295121	-2.2656093	0.005509844	0.1625	79.0	1627.0014147758484
436	-2.841542	1.3843364	-1.1775599	-6.084644	50.0	-0.38596627	0.7551397	-0.0018969811	-5.4576883	1748000	-6.866455e-08	0.0019658485	-0.004938305	-0.00020486885	-2.274539	0.004186332	0.17	79.0	1630.7624199390411
437	-2.941218	1.4146087	-1.2459812	-6.149185	50.0	-0.3943713	0.76878744	0.0009369906	-5.3187866	1752000	-6.484986e-08	0.0026728057	0.0033876076	-0.00047281152	-2.2788363	0.01613545	0.378	1.0	1633.8420705795288
438	-2.8209243	1.366832	-1.2067434	-5.954052	50.0	-0.38629207	0.753647	0.0020921435	-5.2349534	1756000	4.9591065e-08	0.001827986	-0.0061684195	-0.00027629873	-2.2788794	0.00540062	0.16375	79.0	1637.5257022380829
439	-3.1519597	1.423124	-1.2187512	-6.099967	50.0	-0.42481926	0.8183671	-0.0012978371	-5.4156737	1760000	-9.346008e-08	0.0021644426	-0.0061150664	-0.00018833973	-2.2838984	0.003167262	0.18375	79.0	1641.2355961799622
440	-2.9121919	1.342949	-1.2214977	-6.0300245	50.0	-0.39996973	0.76761216	0.00059538335	-5.311085	1764000	5.722046e-09	0.001851952	-0.0059145107	-0.00020441087	-2.2944813	0.003976781	0.136	79.0	1644.8898038864136
441	-2.9294696	1.2831141	-1.2335964	-6.1753592	50.0	-0.39659154	0.7577255	-0.00068541616	-5.357247	1768000	1.9073487e-09	0.0018491877	-0.006289282	-0.0001646817	-2.3023047	0.0017639407	0.148	79.0	1648.588145017624
442	-2.789358	1.3780961	-1.3083646	-5.9560905	50.0	-0.37830535	0.7387272	0.0011650305	-5.177143	1772000	-3.8146972e-08	0.0019315653	-0.0056678583	-0.00023307302	-2.3096495	0.003908112	0.1475	79.0	1652.4888064861298
443	-2.8721874	1.4095047	-1.3231181	-6.100099	50.0	-0.38841712	0.7662928	0.0028261505	-5.4767876	1776000	5.722046e-09	0.0021216297	-0.0055805375	-0.00030719535	-2.3133824	0.005830373	0.20275	79.0	1655.9722986221313
444	-2.879338	1.332933	-1.203135	-6.1126847	50.0	-0.39395186	0.75480765	0.0073782112	-5.317033	1780000	-9.346008e-08	0.0019211433	-0.007855386	-0.00024854264	-2.3193672	0.0021635282	0.164	79.0	1659.2691023349762
445	-2.7871912	1.4604317	-1.2554153	-5.9265976	50.0	-0.37732044	0.7537423	0.003500566	-5.260651	1784000	2.6702882e-08	0.0018158049	-0.0074010105	-0.0002076549	-2.3238366	0.0052400045	0.14875	79.0	1662.7061631679535
446	-2.6352687	1.3353988	-1.1884422	-5.990922	50.0	-0.34861633	0.70094776	0.0008692574	-5.312798	1788000	-2.0980835e-07	0.0016662029	-0.005137206	-0.0001703354	-2.3315556	0.0024578895	0.17575	79.0	1666.0109333992004
447	-2.8033645	1.2760434	-1.1923594	-5.9141917	50.0	-0.37154555	0.7233147	-0.00061138347	-5.2348595	1792000	6.866455e-08	0.0018992972	-0.0054545803	-0.00023663661	-2.33691	0.0027254545	0.14675	79.0	1669.3728873729706
448	-2.8843696	1.5183877	-1.1792822	-5.994749	50.0	-0.3902217	0.7816847	-0.00022450648	-5.28235	1796000	-1.7166137e-08	0.0022302526	-0.006982476	-0.00030065165	-2.339875	0.0017287685	0.121	79.0	1672.585177898407
449	-2.8948166	1.45143	-1.2211403	-5.9842296	50.0	-0.38841727	0.7714562	0.0015990492	-5.2367344	1800000	-2.7656554e-08	0.0025544798	0.007081235	-0.00046361983	-2.3461816	0.015375005	0.42575	41.0	1675.647264957428
450	-2.935611	1.5083199	-1.2982857	-6.0506344	50.0	-0.4028584	0.7935312	0.021184186	-5.3889093	1804000	4.482269e-08	0.0021170126	0.011591696	-0.00036641536	-2.3484628	0.02096442	0.53275	1.0	1678.5920794010162
451	-2.6671748	1.2155008	-1.2101808	-6.003832	50.0	-0.35969725	0.6937691	0.004490366	-5.250046	1808000	9.536743e-08	0.002054983	-0.007068389	-0.0004928425	-2.3485112	0.005477905	0.21675	79.0	1682.140513420105
452	-2.7339694	1.2942411	-1.1919138	-6.0427785	50.0	-0.36952946	0.71708554	0.0021630414	-5.3657203	1812000	-5.531311e-08	0.002468306	0.008944936	-0.0006639139	-2.3516376	0.015585121	0.30325	16.0	1685.320500612259
453	-2.7770762	1.4158959	-1.1962885	-6.13675	50.0	-0.36473876	0.7377796	0.0042586084	-5.266331	1816000	3.8146974e-09	0.0022679712	0.015761418	-0.00056738174	-2.3525212	0.022826338	0.492	1.0	1688.415018081665
454	-2.93405	1.3813525	-1.2217257	-5.9307003	50.0	-0.39024064	0.7708528	0.0011703409	-5.1860065	1820000	7.6293944e-08	0.0031251996	0.015039547	-0.00088389544	-2.3525894	0.017097928	0.46925	1.0	1691.3519065380096
455	-2.9101746	1.3548473	-1.2078482	-6.0077157	50.0	-0.39020008	0.76141846	0.007896835	-5.2692633	1824000	2.002716e-08	0.0033803275	0.008894053	-0.0006880327	-2.3526514	0.017017538	0.404	1.0	1694.3192296028137
456	-2.913939	1.2148448	-1.1743969	-6.1370687	50.0	-0.3998796	0.7481468	0.017682822	-5.4084554	1828000	1.7166137e-08	0.0028401779	0.00830736	-0.0004990266	-2.3527222	0.023112621	0.448	1.0	1697.2582941055298
457	-2.619218	1.1750091	-1.2329999	-6.0329533	50.0	-0.36887905	0.68751705	0.029034523	-5.313086	1832000	4.482269e-08	0.0017571098	0.020734807	-0.0003817461	-2.3528073	0.041492116	0.55075	1.0	1700.202365398407
458	-2.83279	1.2987479	-1.2276558	-6.0403404	50.0	-0.38082144	0.7478812	0.01631846	-5.3258758	1836000	-8.2015994e-08	0.0018499414	0.013739794	-0.00029948785	-2.3528848	0.03934681	0.52425	1.0	1703.1581807136536
459	-2.7656727	1.3619409	-1.3022505	-5.9636903	50.0	-0.37482715	0.7403027	0.009230956	-5.220186	1840000	-7.629395e-09	0.0022603674	0.012884964	-0.0003905628	-2.3529634	0.018395018	0.4205	1.0	1706.0647115707397
460	-2.8159096	1.1944863	-1.2029542	-5.8426127	50.0	-0.38265806	0.7168454	-0.0010536369	-5.117856	1844000	3.4332274e-08	0.0026207443	0.012637375	-0.0007387134	-2.3530405	0.028716773	0.466	1.0	1708.974286556244
461	-2.9176338	1.4418646	-1.1895968	-6.133417	50.0	-0.40087917	0.7786682	0.004904421	-5.2192574	1848000	7.629395e-09	0.0024230047	0.014785233	-0.00050008204	-2.353129	0.021217091	0.38325	1.0	1712.0754146575928
462	-2.6674798	1.3402911	-1.1993464	-6.0296526	50.0	-0.37326184	0.7195264	-0.0015761591	-5.2779093	1852000	-9.1552735e-08	0.0018656971	0.016239418	-0.00034137082	-2.353212	0.026680088	0.46775	1.0	1715.009940624237
463	-3.2169013	1.6111933	-1.2128161	-6.102038	50.0	-0.45092645	0.86344063	0.0013843421	-5.297224	1856000	3.4332274e-08	0.0024381923	0.008039964	-0.0003857147	-2.353299	0.01676117	0.38625	1.0	1720.422770023346
464	-3.0050118	1.3848214	-1.250825	-6.0827823	50.0	-0.4095672	0.79186624	0.0028885957	-5.321333	1860000	-3.4332274e-08	0.0019990995	0.005859562	-0.00023156172	-2.353383	0.02376569	0.486	2.0	1723.3969235420227
465	-2.8296192	1.4548619	-1.1796597	-6.1547146	50.0	-0.388613	0.76739454	-0.00038774312	-5.3478837	1864000	-4.005432e-08	0.0018119825	-0.0072251875	-0.00014473742	-2.3535364	0.003622029	0.19475	79.0	1726.9745061397552
466	-2.8948536	1.3690064	-1.2129718	-6.1557355	50.0	-0.39569134	0.76866615	-0.00025469996	-5.362722	1868000	-2.0980835e-08	0.0017028411	-0.004525836	-0.00012902298	-2.3591208	0.00634989	0.268	79.0	1730.2359371185303
467	-2.7399802	1.1882778	-1.3855777	-5.6993546	50.0	-0.3740008	0.7159318	0.00253015	-4.9647317	1872000	5.722046e-09	0.0016369493	-0.0069736354	-0.00013671385	-2.3658876	0.0028941757	0.167	79.0	1733.7179605960846
468	-2.7234416	1.156684	-1.2703792	-5.9515104	50.0	-0.361146	0.70275724	0.001799643	-5.254209	1876000	-3.242493e-08	0.0015533933	-0.0072793807	-0.00015978876	-2.373456	0.0007429148	0.0925	79.0	1737.115831375122
469	-2.9528873	1.4799173	-1.1947465	-5.9761877	50.0	-0.4025017	0.79474455	-0.001716394	-5.2215877	1880000	1.1825561e-07	0.001790284	-0.006016752	-0.00012788724	-2.3806431	0.0054150494	0.24675	79.0	1740.779170513153
470	-3.1484666	1.49909	-1.2409472	-6.0009956	50.0	-0.4350353	0.8409967	0.004550563	-5.298755	1884000	-6.484986e-08	0.002010607	-0.0062107793	-0.00015352818	-2.3864775	0.0024046204	0.16375	79.0	1744.1353714466095
471	-2.7363365	1.266163	-1.1950258	-6.0368743	50.0	-0.3691126	0.7216646	-0.0008030813	-5.2848673	1888000	9.727478e-08	0.0015575003	-0.006186495	-0.00011632417	-2.3945572	0.0028284395	0.1055	79.0	1749.003890991211
472	-2.8252318	1.2850732	-1.2597616	-6.061615	50.0	-0.38360912	0.74015355	0.00017678551	-5.3022113	1892000	7.629395e-09	0.0017412663	0.0010907592	-0.00013604655	-2.398518	0.015778385	0.4035	72.0	1753.1370537281036
473	-2.6412342	1.182451	-1.2354364	-5.9612675	50.0	-0.35435134	0.6912949	-0.0014550276	-5.2302933	1896000	-1.0299683e-07	0.0014727317	0.0071167983	-0.00011937739	-2.401	0.01704311	0.411	1.0	1756.1919751167297
474	-2.6714826	1.3381113	-1.1797122	-5.9931464	50.0	-0.36033738	0.713047	0.006498052	-5.265376	1900000	2.0980835e-08	0.0020690765	0.00021168994	-0.00041843753	-2.4010317	0.015924864	0.349	21.0	1759.3205873966217
475	-2.7378464	1.301786	-1.181109	-6.0238447	50.0	-0.3672442	0.72484785	0.017785946	-5.266981	1904000	4.005432e-08	0.0018249403	0.014919758	-0.00032930356	-2.4030685	0.021925755	0.532	1.0	1762.2697246074677
476	-2.7616048	1.36963	-1.2069408	-5.9028754	50.0	-0.3743056	0.74086183	-0.001020601	-5.1982627	1908000	3.8146974e-09	0.0020268462	0.0072468375	-0.00046002027	-2.4031827	0.022770789	0.48325	1.0	1765.1839938163757
477	-2.844711	1.3608888	-1.2009776	-6.0596867	50.0	-0.37764245	0.7532799	0.0019978285	-5.4225726	1912000	-1.0681153e-07	0.002048456	-0.003159559	-0.00039430358	-2.403292	0.007144593	0.25475	79.0	1770.2024347782135
478	-3.0000021	1.3428137	-1.3199981	-6.135991	50.0	-0.40481225	0.7791196	-0.00031354278	-5.4141674	1916000	-9.346008e-08	0.0022150464	-0.0014165879	-0.00039743853	-2.4042509	0.015403719	0.368	13.0	1773.537587404251
479	-2.9876208	1.2614287	-1.2844118	-5.9298983	50.0	-0.40000975	0.77181226	-0.004203981	-5.2222695	1920000	7.6293944e-08	0.0018594238	-0.003681205	-0.00020608318	-2.404481	0.003963187	0.2505	79.0	1777.247169494629
480	-2.9283772	1.4026757	-1.2599971	-5.82087	50.0	-0.3961472	0.7755693	0.003712356	-5.1182227	1924000	-1.9073487e-07	0.0019485044	0.00013668441	-0.00018397998	-2.411213	0.015048138	0.36725	12.0	1781.0827805995941
481	-2.970518	1.4679334	-1.296671	-5.9217257	50.0	-0.40286353	0.79707396	0.0013676044	-5.2300634	1928000	1.2016297e-07	0.0019734725	-0.005540944	-0.00021534995	-2.4121115	0.005011392	0.19825	79.0	1786.2847452163696
482	-2.8853302	1.3657132	-1.2210813	-6.0514092	50.0	-0.3933133	0.76343286	-0.0014923774	-5.512365	1932000	-6.484986e-08	0.0018509818	-0.00056427764	-0.00019967451	-2.4197876	0.013124006	0.42325	79.0	1789.4512820243835
483	-3.0954454	1.5152394	-1.2654873	-6.0634623	50.0	-0.41883826	0.8260338	0.0008625332	-5.3645787	1936000	-1.0871887e-07	0.0021242104	-0.004218668	-0.00025165547	-2.4244258	0.004294696	0.2015	79.0	1792.8713402748108
484	-2.583032	1.1710058	-1.1988225	-5.721463	50.0	-0.34287113	0.6777328	-0.0016005374	-5.0787725	1940000	-1.5068055e-07	0.0013864298	-0.005636399	-0.00011628447	-2.4304345	0.0053583877	0.137	79.0	1796.14905834198
485	-2.604252	1.3905421	-1.1902288	-6.0034604	50.0	-0.35621208	0.71694815	0.00095162727	-5.1601205	1944000	1.3351441e-08	0.0013734474	-0.00564929	-0.000113767106	-2.4378607	0.004451425	0.14175	79.0	1799.368992805481
486	-2.9758592	1.3865178	-1.1966933	-6.0399165	50.0	-0.40187672	0.78100955	0.0010185223	-5.299034	1948000	1.5068055e-07	0.0020394968	-0.0063364813	-0.00013235654	-2.441923	0.0072185467	0.22125	79.0	1802.9051911830902
487	-2.8719404	1.3528678	-1.235766	-6.037438	50.0	-0.3871775	0.75713676	0.0028473306	-5.3221445	1952000	-1.1444092e-08	0.0025730862	-0.006108274	-0.0007958845	-2.4459555	0.0023013735	0.12575	79.0	1806.6496043205261
488	-3.0420341	1.5120362	-1.2221978	-6.01536	50.0	-0.4129415	0.81133014	0.0010497645	-5.2613153	1956000	1.5735627e-07	0.0023878668	0.0030574254	-0.0005237402	-2.450033	0.015634907	0.39625	15.0	1809.754614830017
489	-2.8994894	1.3694198	-1.1591662	-5.910268	50.0	-0.3899005	0.76846284	0.0013959743	-5.167963	1960000	4.005432e-08	0.0019351437	0.010053373	-0.00020919589	-2.4509368	0.023397755	0.39625	3.0	1812.6461491584778
490	-2.8359745	1.3887023	-1.2475823	-5.8951764	50.0	-0.38703927	0.7568322	0.004317712	-5.1222873	1964000	3.242493e-08	0.0017544864	0.015160521	-0.00020518969	-2.4511533	0.033257335	0.3585	1.0	1815.6467118263245
491	-2.8980825	1.3643522	-1.2742097	-5.9466553	50.0	-0.38959637	0.7632235	0.004250249	-5.192893	1968000	7.8201296e-08	0.0019988474	0.008076399	-0.0003080991	-2.4512298	0.01786063	0.3425	3.0	1818.6154758930206
492	-2.8757575	1.3023971	-1.2625082	-6.0792627	50.0	-0.39275476	0.7602522	0.00090845674	-5.448909	1972000	1.1444092e-08	0.0019327961	0.0105942	-0.00029466045	-2.4514635	0.028291779	0.41825	1.0	1821.6012003421783
493	-2.6521115	1.3292353	-1.1616508	-6.0839653	50.0	-0.3564276	0.7110377	0.0012667794	-5.428895	1976000	-7.8201296e-08	0.0018146955	0.010029408	-0.00026177696	-2.451542	0.028167378	0.44575	1.0	1824.5872004032135
494	-2.7978225	1.4174161	-1.1873541	-5.9832115	50.0	-0.37929946	0.75454706	0.0016288534	-5.2901816	1980000	-3.4332274e-08	0.0022955115	0.009021956	-0.0006467593	-2.4516423	0.017501501	0.4675	1.0	1827.561108827591
495	-2.7814035	1.1934906	-1.2233343	-5.846429	50.0	-0.36824468	0.7160008	-0.0001644548	-5.1807604	1984000	-8.583069e-08	0.0022574577	0.025235325	-0.0006778771	-2.4517617	0.031659056	0.49425	4.0	1830.5733222961426
496	-2.9673219	1.448394	-1.1817882	-6.1858234	50.0	-0.39607704	0.7782637	0.0009408314	-5.2374115	1988000	1.8119811e-08	0.0031336553	0.019882513	-0.0007711961	-2.452137	0.030498188	0.4645	1.0	1833.5114226341248
497	-2.9822483	1.3712419	-1.1931518	-6.185772	50.0	-0.4031851	0.7727215	0.007567724	-5.318885	1992000	1.5258789e-07	0.004470816	0.016951922	-0.0019855606	-2.4522276	0.022336243	0.47375	1.0	1836.4486484527588
498	-2.7103882	1.2206051	-1.2035669	-5.7883043	50.0	-0.38495266	0.7084745	0.012944952	-5.0717273	1996000	-4.5776368e-08	0.0036091346	0.026225183	-0.0009280448	-2.452319	0.048686065	0.54825	1.0	1840.1849780082703
499	-2.892995	1.3883761	-1.2196182	-5.8054943	50.0	-0.4052429	0.78076243	0.0073476117	-5.1764402	2000000	4.2915346e-08	0.0042068623	0.039170805	-0.0019587341	-2.4524126	0.049089324	0.5905	1.0	1843.2166764736176
500	-2.8817277	1.274405	-1.1817544	-5.9660993	50.0	-0.3870424	0.7583065	0.06109661	-5.220269	2004000	-1.04904174e-07	0.0025918053	0.033837616	-0.00065888825	-2.452522	0.07592275	0.56825	1.0	1846.3724064826965
501	-2.9191108	1.3135471	-1.2575802	-5.8951783	50.0	-0.38940355	0.7641352	0.0011337548	-5.1886806	2008000	-9.727478e-08	0.0021065702	0.025663428	-0.00034221075	-2.4526262	0.050506346	0.446	1.0	1849.343976020813
502	-2.8796582	1.3831439	-1.1931633	-5.945264	50.0	-0.39603713	0.763904	-0.0026932657	-5.236913	2012000	-9.441376e-08	0.0025717018	0.024600456	-0.0008600423	-2.4527385	0.04234768	0.435	1.0	1852.3295764923096
503	-2.671278	1.2323788	-1.2232878	-5.7924995	50.0	-0.3722404	0.7009742	0.0041406695	-5.027766	2016000	1.2397766e-08	0.0029531012	0.022115095	-0.0011693106	-2.4528487	0.017920818	0.4475	4.0	1855.5625669956207
504	-2.8990757	1.3821577	-1.2452434	-6.135873	50.0	-0.4153371	0.76745105	0.008984407	-5.327822	2020000	3.6239623e-08	0.002452237	0.015466617	-0.0005889648	-2.4532168	0.022637067	0.42775	1.0	1858.5827279090881
505	-3.0366108	1.4164875	-1.1937524	-6.185773	50.0	-0.42881823	0.80449474	0.00899375	-5.3767285	2024000	3.8146974e-09	0.0026460993	0.013862486	-0.00061895256	-2.4532924	0.02014468	0.4195	1.0	1865.2587087154388
506	-2.5478985	1.238294	-1.2136289	-6.0599566	50.0	-0.36227664	0.69008106	0.004549861	-5.331553	2028000	-1.1444092e-08	0.001750473	0.01257879	-0.0004706009	-2.4533632	0.020421883	0.44525	1.0	1868.9244153499603
507	-2.6653378	1.2458137	-1.2026131	-6.079905	50.0	-0.36634222	0.7145809	0.023556553	-5.297688	2032000	-5.722046e-09	0.002039574	0.02287598	-0.00054976554	-2.4534273	0.03372249	0.549	1.0	1871.8683452606201
508	-3.2755349	1.4879963	-1.265211	-6.0877433	50.0	-0.45355862	0.87124866	0.0017792042	-5.4354057	2036000	-7.629395e-09	0.0025052507	0.023903565	-0.00043037347	-2.4534888	0.06712983	0.666	1.0	1874.8415439128876
509	-2.7110503	1.250646	-1.2248493	-6.076793	50.0	-0.3658462	0.72201693	0.00015841424	-5.3802004	2040000	-6.866455e-08	0.0017404236	0.030497124	-0.00030344015	-2.4535522	0.05412872	0.552	1.0	1877.8259649276733
510	-2.7185345	1.330602	-1.25406	-6.087789	50.0	-0.3665144	0.7217011	0.009550832	-5.300627	2044000	-1.3542176e-07	0.0027087026	0.026763361	-0.0008736894	-2.4536214	0.025081573	0.3805	1.0	1880.8852350711823
511	-2.8894515	1.5134674	-1.3243968	-6.0662374	50.0	-0.40551013	0.7667088	0.0013010204	-5.2255054	2048000	-8.106232e-08	0.0069874506	0.008835797	-0.0034484812	-2.4536915	0.016948145	0.39225	1.0	1883.9647057056427
512	-2.8263283	1.4319556	-1.2012208	-5.987543	50.0	-0.39494884	0.77158165	0.017368652	-5.271675	2052000	-2.861023e-09	0.0035606285	0.024565708	-0.0015144858	-2.4537654	0.039678816	0.50625	1.0	1890.1367058753967
513	-2.6777883	1.2218642	-1.2296046	-5.9875746	50.0	-0.3594166	0.7029306	0.005382858	-5.262984	2056000	-4.9591065e-08	0.001961091	0.020066136	-0.0005291897	-2.4538474	0.031858753	0.4165	1.0	1894.0957045555115
514	-2.6221623	1.0800307	-1.270616	-5.8927727	50.0	-0.34314653	0.6696545	0.0010662489	-5.1767683	2060000	-1.2397766e-07	0.0014501562	0.0075485324	-0.0001375553	-2.4539313	0.018709652	0.34375	1.0	1896.9555206298828
515	-2.9195237	1.3991266	-1.205619	-6.090297	50.0	-0.38981512	0.7676804	0.0027591325	-5.308178	2064000	1.525879e-08	0.0019337676	-0.0051085385	-0.00024205877	-2.4540303	0.0041014412	0.14675	79.0	1908.4171903133392
516	-2.7821968	1.200896	-1.2110987	-5.813328	50.0	-0.36930686	0.71578944	-0.00016523711	-5.1551914	2068000	1.8501282e-07	0.0018190072	-0.005543311	-0.00025693595	-2.4560854	0.0017613337	0.13825	79.0	1911.7281548976898
517	-2.7168212	1.2151308	-1.1906934	-6.0952954	50.0	-0.3629514	0.7066107	0.004942961	-5.305566	2072000	-1.525879e-08	0.0016043601	-0.0044268225	-0.00016583176	-2.4582767	0.0028873882	0.1055	79.0	1914.899921655655
518	-2.820291	1.4133067	-1.2029922	-6.022664	50.0	-0.37886468	0.7532738	0.00026949123	-5.217703	2076000	6.866455e-08	0.0017740687	-0.0070694434	-0.00014774303	-2.4616494	0.0013822456	0.1405	79.0	1918.178906917572
519	-2.8163443	1.3183668	-1.1990819	-5.906836	50.0	-0.38132593	0.7465217	0.000832323	-5.1991577	2080000	-9.536743e-09	0.0016601718	-0.0053770076	-0.00010994915	-2.4660761	0.0014655377	0.20525	79.0	1921.4334280490875
520	-2.9023614	1.2789164	-1.2781254	-5.978978	50.0	-0.38374448	0.7552898	0.0024313927	-5.306906	2084000	-9.727478e-08	0.0018824432	0.005747738	-0.00020297081	-2.4749691	0.015784115	0.4685	1.0	1924.3342323303223
521	-2.835038	1.5029341	-1.1794946	-6.0553226	50.0	-0.38330054	0.77044684	0.006359266	-5.3458605	2088000	-5.722046e-09	0.0020801427	0.010172923	-0.0003022512	-2.475075	0.016092516	0.46225	1.0	1927.1848454475403
522	-2.7979026	1.2952766	-1.1949754	-6.035211	50.0	-0.37384364	0.73500955	0.003415741	-5.261599	2092000	-4.7683717e-08	0.0017857411	0.007620584	-0.0002290248	-2.4751825	0.020243324	0.4635	5.0	1930.5408902168274
523	-2.5198073	1.1697012	-1.2504593	-6.087793	50.0	-0.33623266	0.66332966	0.0014016647	-5.35796	2096000	-4.386902e-08	0.0013240988	-0.007235882	-0.00011927227	-2.475647	0.001284729	0.10775	79.0	1933.8239946365356
524	-3.257131	1.6724892	-1.2740456	-6.046572	50.0	-0.43981418	0.8758304	0.0038257763	-5.271354	2100000	1.525879e-08	0.0022907539	-0.0054657306	-0.0001491385	-2.483634	0.004459126	0.1375	79.0	1937.0710649490356
525	-2.8321774	1.1870985	-1.1649841	-5.7706485	50.0	-0.37849495	0.7307345	0.001437569	-5.1315966	2104000	4.9591065e-08	0.0019037967	-0.0040910565	-0.00035558315	-2.486486	0.0073072244	0.274	79.0	1940.3383445739746
526	-2.8200696	1.3407525	-1.2302262	-5.9944487	50.0	-0.3760304	0.7470219	0.0009060968	-5.3006487	2108000	5.7220458e-08	0.0016778036	-0.0014968205	-0.0001681993	-2.495694	0.0069881645	0.30325	79.0	1944.1219367980957
527	-2.7511	1.3050113	-1.1985185	-6.1219954	50.0	-0.35859966	0.72409874	0.000721043	-5.345348	2112000	-5.7220458e-08	0.0016776114	-0.006100479	-0.00018562807	-2.4981296	0.0046721734	0.239	79.0	1947.6140897274017
528	-2.8487525	1.4526457	-1.1582301	-6.064246	50.0	-0.3794859	0.7673013	0.0035522971	-5.350389	2116000	-7.8201296e-08	0.0018764191	0.0056037237	-0.00016569067	-2.5054064	0.016668236	0.5685	1.0	1950.6178259849548
529	-2.8412373	1.3565931	-1.1860179	-6.0537734	50.0	-0.37870568	0.7528365	0.007801285	-5.269459	2120000	1.01089476e-07	0.0019159842	0.011404798	-0.00030692597	-2.505496	0.018647203	0.5985	1.0	1953.662300825119
530	-2.9155316	1.3914403	-1.1712729	-6.0839806	50.0	-0.38909256	0.77267706	0.0028204452	-5.378844	2124000	1.1062622e-07	0.0019065783	0.006727399	-0.00019689149	-2.5055947	0.015916303	0.4555	7.0	1956.6420645713806
531	-2.9309227	1.4580445	-1.2570547	-6.116944	50.0	-0.39276075	0.7844436	-0.00042658672	-5.3562636	2128000	6.103516e-08	0.0018859515	0.0138932625	-0.00016265328	-2.506287	0.02500237	0.4895	1.0	1959.5967700481415
532	-2.7500858	1.2625477	-1.3513789	-6.016002	50.0	-0.3627274	0.7167916	0.010083094	-5.3017845	2132000	7.629395e-09	0.001649805	-0.0033342342	-0.000174477	-2.5063994	0.003217649	0.16425	79.0	1963.1491885185242
533	-2.645063	1.139735	-1.2492139	-6.036666	50.0	-0.35397688	0.68761605	-0.0033133905	-5.3149033	2136000	6.2942505e-08	0.0014478068	-0.0072016427	-0.00014778948	-2.513953	0.0023253572	0.112	79.0	1967.8278470039368
534	-2.8645964	1.378145	-1.2701632	-6.095917	50.0	-0.38067126	0.75950474	0.0041521844	-5.377398	2140000	1.335144e-07	0.0017305701	-0.004943577	-0.00014638063	-2.5197809	0.0060482817	0.21675	79.0	1971.416749715805
535	-2.6690392	1.3394355	-1.324219	-5.8487697	50.0	-0.35903743	0.71746624	0.00050692074	-5.1398125	2144000	-3.8146974e-09	0.0014659708	-0.0057043857	-8.796691e-05	-2.5307002	0.0043952814	0.19925	79.0	1974.7529964447021
536	-3.0153685	1.4093001	-1.2120837	-6.0491457	50.0	-0.4043561	0.7963524	0.0012257937	-5.306901	2148000	-3.8146972e-08	0.0021296605	0.0015847969	-0.0003335087	-2.5357761	0.015706083	0.431	26.0	1977.8169574737549
537	-3.0680206	1.4144379	-1.2000494	-6.0574527	50.0	-0.40644476	0.8062176	0.0009396523	-5.338835	2152000	-9.918213e-08	0.0019919784	0.0012716312	-0.00021021848	-2.537809	0.016335918	0.42325	56.0	1980.8194561004639
538	-2.6834297	1.2567933	-1.269132	-6.015722	50.0	-0.35721454	0.7069162	0.0057411175	-5.2769327	2156000	-1.4495849e-07	0.0016110466	0.012201868	-0.00021887198	-2.541527	0.027661731	0.61175	1.0	1983.6573679447174
539	-3.278069	1.4898324	-1.2654811	-6.0115066	50.0	-0.44235107	0.8655478	0.0031617992	-5.3099833	2160000	-5.531311e-08	0.002399652	0.010537785	-0.00029219338	-2.541602	0.016207205	0.48725	1.0	1987.8269882202148
540	-2.8443737	1.3255152	-1.1862594	-6.0502176	50.0	-0.37544718	0.74496716	0.005679831	-5.318901	2164000	0.0	0.002005841	0.0072625503	-0.0002806564	-2.5416543	0.02231071	0.4965	3.0	1991.1629567146301
541	-2.7041266	1.2841526	-1.2130871	-6.026458	50.0	-0.36063746	0.716228	0.012169797	-5.319774	2168000	1.2969971e-07	0.0019584529	0.008934391	-0.00052847585	-2.5418591	0.01706818	0.409	6.0	1994.0695810317993
542	-2.7772837	1.3005768	-1.1873978	-6.025121	50.0	-0.36358804	0.72784746	0.0070825275	-5.3046374	2172000	1.5830993e-07	0.0019925267	0.013487139	-0.00032317464	-2.5423865	0.033332147	0.63575	1.0	1997.0998158454895
543	-2.725333	1.26977	-1.1828645	-5.8693337	50.0	-0.36600548	0.7132436	0.0028770883	-5.1344395	2176000	1.0871887e-07	0.0021483726	0.02727389	-0.00044693076	-2.5424805	0.041920345	0.57575	1.0	1999.979018688202
544	-2.6436799	1.3250118	-1.160808	-5.8197603	50.0	-0.36300677	0.7090622	0.003223434	-5.1604934	2180000	8.773804e-08	0.0019061517	0.015573824	-0.0004079016	-2.542584	0.02497401	0.3715	1.0	2002.7860085964203
545	-2.6462345	1.390708	-1.17654	-6.0760717	50.0	-0.35559714	0.7188678	0.0031330884	-5.3599763	2184000	1.7166137e-08	0.0017504204	0.010261028	-0.0002498089	-2.5427017	0.01795251	0.46875	1.0	2005.6303021907806
546	-2.729575	1.2401178	-1.2029266	-5.6040807	50.0	-0.3620931	0.7152781	0.0073134825	-4.960522	2188000	-8.773804e-08	0.0017164309	0.00942757	-0.00025170273	-2.5428145	0.015657924	0.4275	1.0	2008.4659955501556
547	-2.8552182	1.4533125	-1.1994971	-6.021709	50.0	-0.3831955	0.770515	0.0060183574	-5.2413254	2192000	1.14440915e-07	0.002031224	0.009809976	-0.00037418772	-2.5429196	0.020688236	0.49875	1.0	2011.319843530655
548	-2.4635901	1.2162632	-1.2195207	-5.9593463	50.0	-0.32462615	0.65758896	0.0085214805	-5.200193	2196000	-8.678436e-08	0.0021635378	0.0017663297	-0.000571762	-2.543033	0.016923461	0.48375	35.0	2014.3561055660248
549	-2.8856354	1.4047567	-1.2692786	-5.9239917	50.0	-0.3925356	0.7711487	0.02351526	-5.199618	2200000	3.8146974e-09	0.002075319	0.012578872	-0.00029604102	-2.5446079	0.020839438	0.5835	1.0	2017.2155828475952
550	-2.9998393	1.4718561	-1.1567614	-6.071535	50.0	-0.40441695	0.8031268	0.01952724	-5.4215255	2204000	4.386902e-08	0.002184973	0.006654217	-0.00036918512	-2.5446312	0.015788848	0.4585	1.0	2020.453353881836
551	-2.823176	1.5065149	-1.1775676	-6.021935	50.0	-0.384427	0.77412814	0.008426262	-5.2464657	2208000	8.296966e-08	0.002387129	0.0127913905	-0.00054241694	-2.5446687	0.022715967	0.473	1.0	2023.3000977039337
552	-2.8269382	1.4487773	-1.1854937	-6.062524	50.0	-0.37928358	0.75629467	0.0076370034	-5.3532	2212000	-1.373291e-07	0.0034267716	0.014436635	-0.0011753268	-2.5447083	0.026276797	0.40925	2.0	2026.1968042850494
553	-2.6119885	1.3955276	-1.1556492	-5.838136	50.0	-0.35684654	0.725379	0.015142443	-5.653617	2216000	-7.629395e-09	0.005107782	0.019555302	-0.0034922394	-2.544781	0.015546611	0.38325	1.0	2028.910943031311
554	-3.0067146	1.4101118	-1.1866287	-5.9015036	50.0	-0.41503295	0.80101746	0.0031759627	-5.212107	2220000	-4.005432e-08	0.002096506	0.01043497	-0.00033935718	-2.5448282	0.024227332	0.46775	1.0	2031.6862711906433
555	-2.730194	1.4005216	-1.1683143	-6.0872393	50.0	-0.3698126	0.7419281	0.0070031695	-5.313971	2224000	-1.9741059e-07	0.0017285986	0.012615522	-0.00025050016	-2.544873	0.016821172	0.54525	1.0	2034.5628027915955
556	-2.802229	1.420188	-1.1706753	-6.0782146	50.0	-0.37808573	0.7563581	0.010106176	-5.3442698	2228000	-1.487732e-07	0.0018904471	0.0034327316	-0.00032080954	-2.5449228	0.021800395	0.529	2.0	2037.46777009964
557	-2.6724172	1.2432783	-1.2521716	-5.791676	50.0	-0.35985675	0.71272045	0.008852147	-5.104868	2232000	9.1552735e-08	0.001529053	0.024120362	-0.00021205423	-2.5450714	0.053475205	0.68125	1.0	2040.3554708957672
558	-2.9289577	1.2956885	-1.2206988	-5.9065466	50.0	-0.39188337	0.76042295	0.0037737861	-5.1722383	2236000	-1.373291e-07	0.0019231891	0.025730764	-0.00016705773	-2.5451448	0.048571657	0.66775	1.0	2043.2331490516663
559	-2.805409	1.2461661	-1.2089494	-5.9090996	50.0	-0.37287217	0.7256138	0.004992623	-5.1464057	2240000	4.2915346e-08	0.002731869	0.014955711	-0.0008104377	-2.5452287	0.02404815	0.55075	1.0	2046.0760672092438
560	-3.1469789	1.5028083	-1.3171091	-6.257443	50.0	-0.43413135	0.8402403	0.0037988126	-5.515003	2244000	1.1444092e-08	0.0044373972	0.03658509	-0.0020065433	-2.5453095	0.07154343	0.6395	1.0	2049.1603882312775
561	-2.6896253	1.1805379	-1.1879971	-6.036363	50.0	-0.352346	0.70019794	0.0061142426	-5.2384095	2248000	9.346008e-08	0.0024161192	0.024054885	-0.0006670455	-2.5454078	0.046076514	0.53175	1.0	2052.263806581497
562	-2.595673	1.2722497	-1.2038119	-5.907953	50.0	-0.34500048	0.687937	0.0118418485	-5.402563	2252000	-3.6239623e-08	0.0030770802	0.015407145	-0.0011425387	-2.5454836	0.016250907	0.481	1.0	2055.2444264888763
563	-2.8606558	1.3759061	-1.2639198	-6.086923	50.0	-0.39139253	0.7630036	0.020889219	-5.323487	2256000	3.4332274e-08	0.0020637084	0.011094603	-0.00040632347	-2.545563	0.023268502	0.50875	1.0	2058.232346534729
564	-2.789632	1.34634	-1.2143489	-6.1289625	50.0	-0.3780099	0.75035083	0.008411361	-5.3729706	2260000	2.193451e-08	0.0021334682	0.017552456	-0.00035348232	-2.5456438	0.027399955	0.6165	1.0	2061.450832605362
565	-2.431131	1.1915716	-1.1904395	-5.675715	50.0	-0.3275627	0.6537787	0.026111728	-4.963374	2264000	1.2016297e-07	0.001513113	0.023219177	-0.00028059096	-2.5457153	0.0520812	0.7095	1.0	2064.3807303905487
566	-2.906032	1.4001344	-1.2329558	-6.055537	50.0	-0.3920736	0.7775109	0.0013331864	-5.329089	2268000	-1.1062622e-07	0.0021284083	0.023970943	-0.00032658083	-2.5457876	0.051504005	0.7295	1.0	2067.3366713523865
567	-2.952763	1.386036	-1.2799956	-5.923066	50.0	-0.40324664	0.78684545	0.004293494	-5.2175097	2272000	1.2016297e-07	0.0022320966	0.018766087	-0.00046400353	-2.5458643	0.026842926	0.5845	1.0	2070.3021342754364
568	-2.9925036	1.3872713	-1.234534	-6.0047526	50.0	-0.4054733	0.7884944	0.0032721702	-5.2364306	2276000	9.441376e-08	0.002424792	0.019462196	-0.0004429049	-2.545929	0.03722029	0.58675	1.0	2073.256842136383
569	-2.8735042	1.459128	-1.1526494	-6.0142612	50.0	-0.39216802	0.7773322	0.009113271	-5.327228	2280000	8.773804e-08	0.0022282773	0.018401152	-0.0003954483	-2.5459995	0.042407982	0.621	1.0	2076.205853700638
570	-2.9699302	1.5267433	-1.2309773	-6.1106486	50.0	-0.40102026	0.80219686	0.009104857	-5.252737	2284000	5.4359436e-08	0.0038673023	0.030856974	-0.0016364686	-2.5460799	0.030346587	0.532	1.0	2079.1617448329926
571	-3.1990445	1.3795944	-1.2327578	-6.056242	50.0	-0.43314573	0.83580416	0.027348252	-5.373151	2288000	7.629395e-09	0.0033086746	0.021414269	-0.0010673318	-2.546163	0.033562735	0.6535	1.0	2082.217633008957
572	-2.770987	1.427809	-1.2073947	-6.0354123	50.0	-0.37446672	0.7557034	0.011180814	-5.35043	2292000	1.6975403e-07	0.0018629959	0.015459742	-0.000395371	-2.5462315	0.015266998	0.56425	1.0	2085.09699344635
573	-2.806377	1.3462449	-1.1501696	-6.0968404	50.0	-0.3764709	0.7450174	0.001698127	-5.3189597	2296000	-1.335144e-07	0.0017228626	0.012539691	-0.0001964533	-2.5463128	0.025568182	0.60975	1.0	2088.04053068161
574	-2.9273047	1.431976	-1.3299751	-6.059597	50.0	-0.39795828	0.78921425	-0.00020516105	-5.337489	2300000	-1.7166137e-08	0.00175212	0.017910942	-0.00014076848	-2.5463867	0.026975254	0.6785	1.0	2090.9315350055695
575	-2.993312	1.5126474	-1.2960999	-5.9843993	50.0	-0.40741098	0.8123941	0.0016542487	-5.276188	2304000	-1.7929077e-07	0.0025522518	0.020262	-0.00054055755	-2.54646	0.03797023	0.649	1.0	2093.8286547660828
576	-2.9487286	1.4862565	-1.3006079	-5.983115	50.0	-0.40615916	0.7859501	0.00088156573	-5.1642427	2308000	3.4332274e-08	0.0057937275	0.04215907	-0.0019072501	-2.5465376	0.07692389	0.6905	1.0	2096.6933732032776
577	-2.6875777	1.2926484	-1.2131982	-5.9135585	50.0	-0.37475806	0.7309689	0.019749032	-5.3002334	2312000	6.67572e-08	0.002784833	0.047527224	-0.0014586989	-2.5466132	0.05593943	0.68675	1.0	2099.586394548416
578	-2.8444304	1.3302864	-1.2470477	-5.8708224	50.0	-0.38123837	0.75308394	0.00084934384	-5.1369057	2316000	4.5776368e-08	0.0017565734	0.021188136	-0.00022428972	-2.5466948	0.036099233	0.627	1.0	2102.4951224327087
579	-2.8254316	1.2170091	-1.2031072	-6.1550317	50.0	-0.38707715	0.7396303	-0.0011457559	-5.2505655	2320000	1.0299683e-07	0.0016336842	0.015548002	-0.00019972154	-2.5467734	0.03155386	0.5545	1.0	2105.3733854293823
580	-3.085001	1.4929495	-1.2001845	-6.0259366	50.0	-0.42654625	0.8334713	0.00021715462	-5.347753	2324000	9.536743e-09	0.0019457417	0.0119178435	-0.0002037175	-2.5468528	0.029146897	0.51125	1.0	2108.712242603302
581	-2.6354814	1.1344236	-1.215348	-6.14292	50.0	-0.3615739	0.69123864	0.00320491	-5.4327254	2328000	5.7220458e-08	0.0016070198	0.004054218	-0.00024079846	-2.546933	0.021802688	0.46025	2.0	2111.6811985969543
582	-2.9609723	1.4611896	-1.272111	-5.9340906	50.0	-0.4069024	0.80286235	-0.001222359	-5.1882486	2332000	-1.2397766e-07	0.0018596653	0.0031597784	-0.00022532861	-2.5470922	0.015761727	0.483	13.0	2114.7143762111664
583	-2.9571185	1.5074514	-1.2277048	-6.106503	50.0	-0.40691724	0.8093038	0.00083381496	-5.3902087	2336000	1.8692016e-07	0.0019107636	0.010696764	-0.00019068609	-2.5482085	0.029176917	0.5465	1.0	2117.5935769081116
584	-2.9761555	1.4049184	-1.2019103	-6.1205335	50.0	-0.40914372	0.7991619	0.0023244433	-5.3377624	2340000	-7.05719e-08	0.0019433312	0.013239722	-0.00024140917	-2.5482888	0.024702584	0.51675	1.0	2120.471286535263
585	-2.9945767	1.4580226	-1.1678402	-6.2032843	50.0	-0.41039714	0.8107615	0.00084977224	-5.358237	2344000	-1.9454956e-07	0.0019142841	0.0133676035	-0.00026188442	-2.548352	0.01865655	0.4855	1.0	2123.3817160129547
586	-2.9134934	1.3270711	-1.3048325	-5.783912	50.0	-0.39183134	0.76856965	-0.0006259773	-5.16023	2348000	-7.2479246e-08	0.0020734982	0.011923206	-0.00033904577	-2.5484176	0.022877717	0.482	1.0	2126.310567855835
587	-2.8830643	1.2816883	-1.2829651	-5.930445	50.0	-0.38460147	0.7564013	0.0013065226	-5.1998124	2352000	1.5830993e-07	0.0018079693	0.013385414	-0.00022615457	-2.5484836	0.0273712	0.5165	1.0	2129.210082769394
588	-2.9027379	1.3891306	-1.2385308	-6.0151324	50.0	-0.38850707	0.767641	0.00092718005	-5.3315973	2356000	-1.6212464e-08	0.0026098974	0.008788846	-0.0006227242	-2.5485563	0.02069695	0.46275	2.0	2132.1738736629486
589	-2.8668313	1.3195839	-1.207577	-6.0336065	50.0	-0.38617465	0.7601982	0.0033595916	-5.318524	2360000	1.2588501e-07	0.0018599763	0.014640524	-0.00029949239	-2.5487545	0.027527275	0.56675	1.0	2135.0919420719147
590	-2.6152065	1.1763672	-1.2212338	-5.9866877	50.0	-0.34930485	0.6859485	0.00126688	-5.278638	2364000	7.6293944e-08	0.0014278617	0.00902758	-0.00016977347	-2.5488555	0.01598897	0.51	3.0	2137.9732983112335
591	-2.8710697	1.3816466	-1.3280029	-6.0223956	50.0	-0.38855633	0.7689282	0.00270186	-5.302042	2368000	-1.373291e-07	0.001685605	-0.0052700997	-0.0001421211	-2.549163	0.0017973167	0.14625	79.0	2141.290507555008
592	-2.8262448	1.34694	-1.2488021	-5.9919395	50.0	-0.38025588	0.7560919	-8.2787126e-05	-5.276827	2372000	9.346008e-08	0.0015588112	-0.007274048	-0.00013780792	-2.5547063	0.003301347	0.1545	79.0	2144.450808286667
593	-2.8091118	1.3067245	-1.2185717	-6.008296	50.0	-0.38077748	0.74681836	0.0021786783	-5.312231	2376000	-3.4332274e-08	0.0015993548	-0.0047520436	-0.00015480851	-2.5590138	0.0030621018	0.14575	79.0	2147.637383699417
594	-2.8606524	1.4427446	-1.1817204	-5.992563	50.0	-0.38022053	0.7736504	0.0018600188	-5.2574186	2380000	-3.242493e-08	0.001723228	-0.006936958	-0.0001220816	-2.5683799	0.0013332685	0.1305	79.0	2150.891553878784
595	-2.8748887	1.2708638	-1.2254955	-5.936339	50.0	-0.38365704	0.75404096	0.0010144487	-5.2058835	2384000	1.411438e-07	0.0016059699	-0.005362305	-0.00015355891	-2.570536	0.005422471	0.3265	79.0	2154.129851579666
596	-2.8867364	1.3463066	-1.2337834	-5.9649477	50.0	-0.3814271	0.76286095	0.0026277397	-5.2748475	2388000	6.103516e-08	0.0018569825	-0.0053151473	-0.0002350302	-2.573854	0.0014151795	0.20825	79.0	2157.318237066269
597	-2.670995	1.3895619	-1.196277	-5.8752995	50.0	-0.36309946	0.7342153	0.002543008	-5.197246	2392000	7.152558e-08	0.0018456823	0.0068936795	-0.00047113874	-2.5778296	0.024075055	0.45525	1.0	2160.144568681717
598	-2.8993661	1.5061804	-1.1606035	-6.056426	50.0	-0.38746879	0.7864001	0.00030794926	-5.255195	2396000	-5.1498414e-08	0.0019375621	0.010354058	-0.0002873945	-2.577854	0.023322951	0.48125	1.0	2163.003343820572
599	-2.8843868	1.2823448	-1.2265525	-5.754908	50.0	-0.38100457	0.7550552	0.0026027001	-5.084789	2400000	4.5776368e-08	0.0019568922	0.008163071	-0.00026077754	-2.5778904	0.016601892	0.49675	5.0	2165.8576142787933
600	-2.91053	1.4530556	-1.1776336	-6.070399	50.0	-0.38851655	0.78279173	0.0034954809	-5.338845	2404000	-5.722046e-09	0.002654173	0.011929042	-0.0008320493	-2.578125	0.02065823	0.6155	1.0	2168.8444917201996
601	-2.761562	1.3878833	-1.1638473	-5.894714	50.0	-0.37434965	0.7546633	0.0044163615	-5.1988134	2408000	-1.8310547e-07	0.001897615	0.0069391974	-0.00041925977	-2.5781927	0.016598707	0.3595	3.0	2172.0879395008087
602	-3.0751224	1.3730084	-1.2847617	-5.9854417	50.0	-0.40424398	0.7993679	0.0033437219	-5.205668	2412000	3.4332274e-08	0.0026847553	0.015064881	-0.0004866477	-2.5783389	0.052103672	0.54225	1.0	2175.0034132003784
603	-2.9621668	1.4440924	-1.2017527	-6.0291595	50.0	-0.39966142	0.7917188	0.013017757	-5.2998524	2416000	-7.724762e-08	0.0025986526	0.027493553	-0.0007053106	-2.5784	0.054349687	0.51725	1.0	2177.966730117798
604	-2.9014862	1.4409184	-1.1749518	-6.0620184	50.0	-0.38335866	0.77539265	0.0070978217	-5.2839785	2420000	1.1062622e-07	0.0021522897	0.016580323	-0.0003844347	-2.578461	0.019710924	0.477	1.0	2180.929704427719
605	-2.796622	1.4775497	-1.2128181	-6.177968	50.0	-0.37831235	0.7649699	0.012822291	-5.365775	2424000	-2.9563903e-08	0.0022248612	0.010588063	-0.00045146677	-2.5785215	0.022699742	0.5125	1.0	2183.881956577301
606	-2.8622615	1.4201415	-1.2207897	-6.07659	50.0	-0.39060456	0.7714899	0.004320912	-5.3569317	2428000	1.8882751e-07	0.0021700636	0.016631845	-0.0004658288	-2.5785713	0.020738853	0.5725	1.0	2186.9264652729034
607	-2.675897	1.2100027	-1.2195419	-5.7516975	50.0	-0.36050335	0.706942	0.010391481	-5.0524416	2432000	-5.7220458e-08	0.0015409958	0.013586704	-0.00021911412	-2.578624	0.025431437	0.57025	1.0	2193.6583116054535
608	-2.668124	1.2236618	-1.2089609	-5.880555	50.0	-0.35745093	0.7073676	0.0059754644	-5.194478	2436000	6.2942505e-08	0.001492349	0.012657011	-0.00014350878	-2.5786748	0.021724578	0.413	1.0	2196.8963923454285
609	-2.92752	1.3066131	-1.2390003	-5.946877	50.0	-0.3934388	0.77196723	0.0035317447	-5.27939	2440000	6.866455e-08	0.0017249637	0.009876175	-0.00018955849	-2.5787418	0.030720107	0.48175	1.0	2199.743506193161
610	-2.6486287	1.3540525	-1.1927341	-5.977188	50.0	-0.34976676	0.71762806	0.000696104	-5.286636	2444000	-6.67572e-08	0.0016097436	0.011418448	-0.00020654371	-2.5787992	0.022101514	0.52525	1.0	2202.6274433135986
611	-2.619933	1.3225805	-1.1815113	-5.9906583	50.0	-0.3490014	0.7087091	-0.0009516869	-5.252206	2448000	8.010864e-08	0.0016393816	0.010075025	-0.0002962699	-2.5788672	0.016378412	0.4315	1.0	2205.460602283478
612	-2.9051545	1.4415057	-1.2199881	-6.0306373	50.0	-0.3939258	0.7820838	0.0014044959	-5.33778	2452000	-1.3351441e-08	0.0018484757	0.0030083617	-0.00024899503	-2.5789375	0.01679853	0.37775	2.0	2208.3143875598907
613	-2.7034729	1.2498085	-1.1899686	-5.710982	50.0	-0.36899722	0.7185465	-0.00028225593	-5.052587	2456000	-6.103516e-08	0.0018285417	0.006146431	-0.00048311823	-2.5790994	0.016430458	0.44525	2.0	2211.091997385025
614	-2.885405	1.495456	-1.2310331	-6.024333	50.0	-0.39090106	0.7819761	-0.00068295747	-5.246404	2460000	-1.4686584e-07	0.0025983434	0.0074524744	-0.00058957003	-2.579266	0.019568123	0.47675	3.0	2214.0270204544067
615	-2.8160844	1.5315893	-1.250681	-5.9639144	50.0	-0.39051965	0.7792648	0.013471562	-5.256513	2464000	1.783371e-07	0.0018795987	0.00533986	-0.0002564016	-2.5794961	0.015825696	0.31275	79.0	2217.547468662262
616	-2.6817374	1.3659265	-1.2242596	-5.9175835	50.0	-0.36745638	0.7271646	0.0025211442	-5.197196	2468000	-9.727478e-08	0.0019803834	0.00301429	-0.00039002486	-2.584654	0.017545538	0.35625	2.0	2220.652562856674
617	-2.8352647	1.3804514	-1.25311	-6.0247064	50.0	-0.3918844	0.76144135	-0.0009528529	-5.290459	2472000	1.0681153e-07	0.0017008303	0.0073433593	-0.00015708443	-2.5847774	0.01676532	0.52625	24.0	2224.0044696331024
618	-2.539062	1.1382897	-1.13766	-5.6843567	50.0	-0.3456035	0.6732655	0.00022013485	-5.012121	2476000	1.2588501e-07	0.0013173345	0.0139627205	-0.00016741233	-2.5875847	0.020561822	0.5335	1.0	2227.1240108013153
619	-2.9264674	1.4606719	-1.2245545	-5.9591765	50.0	-0.39429113	0.7920275	0.0033513345	-5.2208176	2480000	6.2942505e-08	0.0018609365	0.0121537205	-0.00027273083	-2.587708	0.017324582	0.551	1.0	2230.3078014850616
620	-2.5746534	1.0574312	-1.2847034	-5.6047573	50.0	-0.34016952	0.66160905	0.00016543455	-4.95647	2484000	-3.8146972e-08	0.0016307769	-0.0046064616	-0.00048060634	-2.5878212	0.006564866	0.1785	79.0	2234.41499209404
621	-2.6910524	1.1447527	-1.1795813	-5.900376	50.0	-0.35650644	0.69719154	0.0005295668	-5.219784	2488000	1.1444092e-08	0.0016350955	-0.006550272	0.00020154635	-2.5953019	0.0020150444	0.1745	79.0	2242.145584821701
622	-2.7713299	1.3164879	-1.2391505	-6.0454965	50.0	-0.35233712	0.7407433	0.021605255	-5.2814612	2492000	-3.6239623e-08	0.0019377014	-0.0057208347	-0.0004954331	-2.5998657	0.0041253143	0.1885	79.0	2245.9205136299133
623	-2.59361	1.4556533	-1.13419	-5.9520206	50.0	-0.3503188	0.7283944	0.00030515715	-5.257031	2496000	4.482269e-08	0.0014820056	-0.006502467	-0.00016813749	-2.6094365	0.0035735124	0.22575	79.0	2250.234438419342
624	-2.6435328	1.2495384	-1.1688956	-5.996031	50.0	-0.35600355	0.7035585	-0.0013249982	-5.2718534	2500000	2.2888184e-08	0.0015603399	-0.0062387865	-0.0002988591	-2.613378	0.004411014	0.17575	79.0	2253.6301221847534
625	-2.8119118	1.2535163	-1.2711458	-6.010745	50.0	-0.370771	0.7389263	0.010215243	-5.2711997	2504000	-1.5449524e-07	0.0016438281	-0.0055815713	-0.00015404134	-2.609875	0.0041234447	0.1905	79.0	2257.0946633815765
626	-2.5704987	1.2637986	-1.2095448	-5.851894	50.0	-0.33839676	0.6924317	-0.00025551952	-5.1763887	2508000	4.005432e-08	0.0014015082	0.0077793133	-0.00016575796	-2.6131003	0.022749024	0.50725	1.0	2260.050518512726
627	-3.0813556	1.5308063	-1.203998	-6.0095577	50.0	-0.4176563	0.83556783	0.00068219565	-5.2573056	2512000	6.484986e-08	0.0018256272	0.008477209	-0.00011752301	-2.6131496	0.025296666	0.57975	1.0	2263.4964480400085
628	-2.5678658	1.143035	-1.2105547	-5.765843	50.0	-0.33614254	0.6735885	0.0020264927	-5.0869823	2516000	1.5449524e-07	0.0012990091	0.00687644	-0.00010265084	-2.6131973	0.018725783	0.43025	1.0	2266.434659719467
629	-2.5540547	1.2581079	-1.1652182	-6.121349	50.0	-0.3430323	0.68419194	0.0018569361	-5.2621675	2520000	-1.3351441e-08	0.0035045356	0.0019197969	-0.0018698393	-2.6132445	0.017671164	0.3925	1.0	2269.3775260448456
630	-2.8864164	1.3268737	-1.1958767	-5.8801236	50.0	-0.38837546	0.76716846	0.0076412726	-5.2133155	2524000	4.2915346e-08	0.002366909	0.013566949	-0.00081888784	-2.6133018	0.017272793	0.386	2.0	2272.350377559662
631	-2.6613207	1.2105151	-1.18247	-5.9028406	50.0	-0.35086444	0.69719166	0.00064547546	-5.214387	2528000	3.6239623e-08	0.0023145487	0.009195852	-0.00064759376	-2.6134408	0.021695755	0.44525	1.0	2275.244602203369
632	-2.7772713	1.3027476	-1.1691464	-5.7478757	50.0	-0.3738548	0.7434013	0.0060864855	-5.114441	2532000	1.9073487e-09	0.001756515	0.006311058	-0.0003128691	-2.613503	0.016551008	0.394	33.0	2278.352055311203
633	-2.7376864	1.2920696	-1.2745615	-6.1562924	50.0	-0.3676476	0.7302908	0.00047070533	-5.215561	2536000	-5.531311e-08	0.0017763809	0.017063998	-0.00029483368	-2.6148682	0.050121475	0.43525	1.0	2281.2368619441986
634	-2.8066509	1.1957579	-1.1510196	-5.9478765	50.0	-0.3819541	0.73603386	-0.0007531643	-5.4606814	2540000	-1.01089476e-07	0.0022890063	0.03309205	-0.0008137827	-2.6149104	0.06955345	0.49875	2.0	2284.1344344615936
635	-2.8096092	1.3340001	-1.1979777	-6.1764693	50.0	-0.3730334	0.7362262	0.0030803606	-5.273411	2544000	-9.536744e-10	0.0040534697	0.03292279	-0.0018943076	-2.6149912	0.030726701	0.43475	1.0	2287.032338619232
636	-2.9811594	1.5495261	-1.185467	-6.0773797	50.0	-0.40913108	0.80759174	0.017082	-5.3044343	2548000	4.2915346e-08	0.0038018385	0.021931555	-0.001498457	-2.6150494	0.016959026	0.39375	1.0	2290.0746071338654
637	-2.806477	1.2975659	-1.1965275	-5.77633	50.0	-0.38798866	0.7557469	0.0055684224	-5.257962	2552000	5.722046e-09	0.0018633802	0.017673692	-0.0004613693	-2.6150923	0.026304772	0.617	1.0	2293.0561575889587
638	-2.4601636	1.2471057	-1.170976	-5.536079	50.0	-0.33169255	0.6739226	0.0005360544	-5.016409	2556000	2.0980835e-08	0.0016897002	0.02401663	-0.00046535698	-2.6151412	0.0409246	0.62425	1.0	2295.8984677791595
639	-2.9184878	1.4668759	-1.1524639	-6.025096	50.0	-0.40442035	0.8004959	0.00087129883	-5.258322	2560000	1.3160705e-07	0.0019938606	0.02557752	-0.00038849807	-2.6151943	0.0740264	0.5975	1.0	2298.795908689499
640	-2.8995068	1.5226206	-1.2209666	-6.023356	50.0	-0.39781296	0.80786455	0.00073969364	-5.3427973	2564000	7.2479246e-08	0.0017233692	0.021926159	-0.00023934618	-2.6152484	0.07010953	0.5025	1.0	2301.683928966522
641	-2.6215603	1.2865494	-1.1843619	-6.000332	50.0	-0.35957903	0.7134281	0.00077108294	-5.3024874	2568000	4.7683717e-08	0.0014343536	0.019310094	-0.00015178474	-2.6153154	0.043493837	0.468	1.0	2304.586190223694
642	-2.9835033	1.4215492	-1.1541508	-6.0102644	50.0	-0.41260582	0.8074648	0.003930295	-5.2795305	2572000	9.1552735e-08	0.0017071813	0.013171387	-0.00018802984	-2.6153839	0.034880314	0.42075	1.0	2307.56857919693
643	-2.762714	1.3520565	-1.3281726	-6.1278596	50.0	-0.37888062	0.7425435	0.0011673011	-5.2819963	2576000	-9.632111e-08	0.0028890278	0.02734617	-0.0012091228	-2.6154475	0.034605093	0.5145	2.0	2310.5801746845245
644	-2.9154582	1.3164065	-1.2381154	-5.8980637	50.0	-0.40328595	0.77970785	0.011886185	-5.250639	2580000	9.536743e-08	0.0019807888	0.027883984	-0.0004014083	-2.6155922	0.05876917	0.48275	1.0	2313.6446051597595
645	-2.8189156	1.5021685	-1.1520408	-5.9791613	50.0	-0.38994038	0.78783625	0.003888227	-5.322781	2584000	5.722046e-09	0.0016778269	0.023913521	-0.00026412052	-2.6156645	0.058165636	0.5285	1.0	2316.5487384796143
646	-2.8248043	1.2386988	-1.2079663	-5.8940096	50.0	-0.38310486	0.74655336	0.000330491	-5.1491656	2588000	-3.051758e-08	0.0015702682	0.0121705625	-0.00019278552	-2.615734	0.028662138	0.486	1.0	2319.58864402771
647	-2.909577	1.437555	-1.2024575	-6.0588107	50.0	-0.3992887	0.7906645	0.0028825738	-5.269969	2592000	8.010864e-08	0.0020418735	0.012671596	-0.00027260673	-2.615805	0.023563534	0.54575	1.0	2322.488447904587
648	-2.6759057	1.3843615	-1.1478139	-5.920365	50.0	-0.3666001	0.7394665	0.019910224	-5.1936216	2596000	1.9073486e-08	0.001579329	0.018286599	-0.00019047677	-2.6158848	0.031948682	0.5975	1.0	2325.396889448166
649	-2.8924224	1.4431118	-1.194075	-6.0844574	50.0	-0.3922655	0.7837018	0.011827348	-5.3752446	2600000	-9.536743e-09	0.0020575016	0.015943706	-0.00045508845	-2.6159608	0.037990715	0.61575	1.0	2328.3043570518494
650	-2.7460072	1.3937306	-1.1826388	-5.920277	50.0	-0.36756828	0.74692947	0.0045867786	-5.213304	2604000	3.8146974e-09	0.001868233	0.019444712	-0.00024261966	-2.6160464	0.03795355	0.49275	1.0	2331.9138879776
651	-2.8217552	1.4561536	-1.1950926	-6.225015	50.0	-0.38352212	0.7554568	0.0092031285	-5.2556195	2608000	-1.0299683e-07	0.005284208	0.0284002	-0.003004808	-2.6161299	0.03477103	0.54925	2.0	2334.85489153862
652	-2.5838647	1.1206138	-1.1991632	-6.1940937	50.0	-0.36309433	0.67702067	0.019414978	-5.254785	2612000	-4.386902e-08	0.003299764	0.029838542	-0.0012763122	-2.6163137	0.026203983	0.448	1.0	2338.5735850334167
653	-2.7762215	1.4254655	-1.1778884	-6.0136085	50.0	-0.38836595	0.7567836	0.01887857	-5.2572465	2616000	-8.773804e-08	0.0036699853	0.026761778	-0.0011616971	-2.6163964	0.031907324	0.51975	1.0	2341.720859527588
654	-3.1504307	1.5772299	-1.3184404	-6.06307	50.0	-0.4619355	0.86773115	0.017995026	-5.3180566	2620000	2.2411346e-07	0.005193916	0.04477745	-0.0025018612	-2.6164768	0.06567431	0.6415	1.0	2344.7581918239594
655	-2.872894	1.4182395	-1.1634564	-6.0402503	50.0	-0.3931972	0.7738436	0.010996159	-5.3254275	2624000	-7.5340274e-08	0.0031745376	0.025051728	-0.0013049752	-2.6165657	0.071729474	0.61725	1.0	2348.9619631767273
656	-3.0353475	1.4458216	-1.2072195	-5.9741273	50.0	-0.41007072	0.80913496	0.011379136	-5.255952	2628000	2.4795533e-08	0.0019459688	0.030740637	-0.000189916	-2.6166658	0.076634936	0.72625	1.0	2351.9640340805054
657	-2.6673715	1.294643	-1.2501011	-6.1396093	50.0	-0.35895485	0.71939826	0.0071237907	-5.3709607	2632000	-8.773804e-08	0.0020122372	0.03945163	-0.0006101772	-2.616751	0.099687725	0.74475	1.0	2356.067905664444
658	-2.7473218	1.3105803	-1.2291235	-5.9186397	50.0	-0.37030035	0.7311883	0.012685444	-5.228559	2636000	-2.3841858e-08	0.0023386267	0.030107591	-0.0007380422	-2.6168396	0.061417233	0.583	1.0	2359.726009607315
659	-2.5918243	1.1397026	-1.2270037	-5.7616043	50.0	-0.35450056	0.67460257	0.0013880208	-5.0732894	2640000	3.8146972e-08	0.0023830242	0.029570019	-0.0010721281	-2.6169233	0.029609079	0.5105	1.0	2362.726551294327
660	-2.7537735	1.2392712	-1.2939036	-5.947493	50.0	-0.38556874	0.72648615	0.0069866497	-5.23466	2644000	1.411438e-07	0.0022766897	0.009417108	-0.0006135097	-2.6170015	0.015604163	0.4545	2.0	2366.071423768997
661	-2.4593973	1.0878481	-1.3091545	-6.002515	50.0	-0.35367185	0.65996194	0.035298724	-5.3085213	2648000	8.010864e-08	0.0024179216	0.04570279	-0.0010244574	-2.6171465	0.07124455	0.7165	1.0	2369.4147284030914
662	-2.953263	1.4354422	-1.2409616	-6.04247	50.0	-0.4106223	0.79894996	0.020455506	-5.263924	2652000	4.196167e-08	0.0022343886	0.054015845	-0.0005913725	-2.6172087	0.07971258	0.754	1.0	2372.37286734581
663	-2.6885324	1.273413	-1.3178964	-6.066777	50.0	-0.36468726	0.71902966	0.010695616	-5.3058233	2656000	1.3351441e-08	0.001531895	0.031996377	-0.00020916271	-2.6172807	0.040967833	0.664	1.0	2375.3202228546143
664	-3.03793	1.4653109	-1.2905606	-6.0058913	50.0	-0.42043608	0.8213085	0.004226595	-5.302039	2660000	-2.2315979e-07	0.0019873816	0.022410525	-0.00035606558	-2.6173515	0.04252151	0.65075	1.0	2378.2778854370117
665	-2.8231635	1.2152016	-1.1992236	-5.9077253	50.0	-0.38705042	0.7420198	0.0045456775	-5.216615	2664000	2.4795533e-08	0.0015271221	0.016677061	-0.00013919163	-2.6174414	0.035069734	0.6145	1.0	2381.2254412174225
666	-2.826227	1.4118953	-1.2154449	-6.0452595	50.0	-0.38312557	0.7696075	0.0024407487	-5.360664	2668000	5.7220458e-08	0.001632111	0.019750532	-0.0001395864	-2.617523	0.0534347	0.67725	1.0	2384.168797492981
667	-2.9028208	1.3648839	-1.2161847	-6.012261	50.0	-0.40042672	0.78210104	0.0021174122	-5.2917976	2672000	-2.2888184e-08	0.0017118206	0.02821931	-0.000188948	-2.6175938	0.05737855	0.61775	1.0	2387.201588869095
668	-2.7633579	1.5322587	-1.185309	-5.994237	50.0	-0.3764093	0.76927036	0.0016206447	-5.3151894	2676000	-1.13487246e-07	0.0034801147	0.026708165	-0.0014654328	-2.6176736	0.051045254	0.52125	1.0	2389.9119172096252
669	-2.8862903	1.4067544	-1.1790519	-6.1302104	50.0	-0.4024002	0.758006	0.004575953	-5.2299185	2680000	3.4332274e-08	0.008421091	0.062675074	-0.0054404703	-2.6177452	0.12639602	0.73125	1.0	2392.9083137512207
670	-2.7950003	1.4102528	-1.2063037	-6.2040925	50.0	-0.40897083	0.76486933	0.048192013	-5.2549477	2684000	2.9087067e-08	0.007210039	0.100310795	-0.004874356	-2.6177998	0.10057172	0.69525	1.0	2395.837646007538
671	-2.9199848	1.5751694	-1.2854697	-6.079922	50.0	-0.4185974	0.8187083	0.04168077	-5.324751	2688000	9.536743e-08	0.004030281	0.061020255	-0.0019659335	-2.6178687	0.085511506	0.71125	1.0	2398.7461202144623
672	-2.9192383	1.4443239	-1.3115295	-6.347328	50.0	-0.42018485	0.7924418	0.022656143	-5.535965	2692000	-2.0599366e-07	0.0025230227	0.04564259	-0.0006493146	-2.617917	0.07912025	0.65875	1.0	2401.6981649398804
673	-2.808781	1.4379915	-1.225201	-6.125604	50.0	-0.41118994	0.7836364	0.015621135	-5.4841905	2696000	5.1498414e-08	0.0034965381	0.056455664	-0.0014828679	-2.617953	0.072008625	0.6445	1.0	2404.697438955307
674	-2.5180948	1.2166184	-1.1902757	-5.9361954	50.0	-0.3530921	0.6917984	0.008282118	-5.2560644	2700000	-1.6975403e-07	0.0022440287	0.040279	-0.0009672787	-2.618002	0.06648636	0.6075	1.0	2407.7016270160675
675	-2.922372	1.392692	-1.2365996	-6.1160007	50.0	-0.4068573	0.7978847	0.008629838	-5.390389	2704000	1.14440915e-07	0.0019937665	0.036238514	-0.00042942213	-2.6180415	0.07561676	0.64175	1.0	2410.729425430298
676	-2.7762604	1.3747973	-1.1774348	-6.085754	50.0	-0.37938556	0.75576293	0.005705446	-5.356967	2708000	3.8146972e-08	0.0015499414	0.025790459	-0.00014473405	-2.618073	0.06919139	0.56775	1.0	2413.7014112472534
677	-2.7641335	1.3777547	-1.1771579	-6.090991	50.0	-0.37333515	0.7539781	5.859323e-05	-5.3490252	2712000	-4.5776368e-08	0.0020714765	0.01734891	-0.00048453442	-2.6181216	0.04795736	0.4725	1.0	2420.0554242134094
678	-2.7705688	1.3488542	-1.1457773	-6.0529356	50.0	-0.37405413	0.7394077	0.018580718	-5.343542	2716000	4.482269e-08	0.0024370675	0.025153987	-0.00064395706	-2.6181662	0.0433758	0.554	1.0	2423.0782034397125
679	-2.8878365	1.4024744	-1.2274073	-6.00114	50.0	-0.39023378	0.770653	0.0010982472	-5.2852306	2720000	-9.536743e-09	0.002777454	0.020846756	-0.0007310377	-2.6182227	0.03798793	0.60825	1.0	2426.0635776519775
680	-3.1123729	1.4589362	-1.1742164	-6.065843	50.0	-0.43222865	0.8194928	0.007874159	-5.2681828	2724000	-1.1634827e-07	0.0032303235	0.022101453	-0.0009597142	-2.6182704	0.03702356	0.64775	1.0	2429.0555250644684
681	-2.8661299	1.2982165	-1.1822671	-5.867397	50.0	-0.3948864	0.7597738	0.0072055105	-5.205626	2728000	9.632111e-08	0.0028696717	0.042942576	-0.00091567007	-2.6183472	0.07833275	0.70525	1.0	2432.0771560668945
682	-3.048612	1.4389052	-1.1828411	-5.872044	50.0	-0.4164095	0.8225359	0.0067994706	-5.1563396	2732000	-5.1498414e-08	0.0026955898	0.04184947	-0.0008689872	-2.6184108	0.11984211	0.72175	1.0	2435.099061489105
683	-2.911797	1.5814124	-1.216366	-6.133297	50.0	-0.3898226	0.80534637	0.0005011745	-5.389884	2736000	1.3351441e-08	0.0019006457	0.036774687	-0.00029990205	-2.6184886	0.050427023	0.649	1.0	2438.149227619171
684	-2.702705	1.2471743	-1.197143	-6.11547	50.0	-0.36262923	0.7203792	0.00060375594	-5.3484592	2740000	1.7547607e-07	0.0020477232	0.024185782	-0.0004620595	-2.6185613	0.029776113	0.6265	1.0	2441.1222546100616
685	-2.7992144	1.1636031	-1.203734	-6.0445495	50.0	-0.3858248	0.7269038	0.003446024	-5.2146907	2744000	-5.7220458e-08	0.0045400914	0.019019948	-0.0026842365	-2.618631	0.02554101	0.56	1.0	2444.1119797229767
686	-2.7893066	1.3312284	-1.25229	-6.1782594	50.0	-0.39073864	0.7557322	0.008334069	-5.4517975	2748000	-2.6702882e-08	0.0015494617	0.011420212	-0.00015413889	-2.6187022	0.031326085	0.59325	1.0	2451.0081384181976
687	-3.1146348	1.3460356	-1.241263	-6.1427875	50.0	-0.4402759	0.8258606	0.0049891975	-5.4143915	2752000	9.059906e-08	0.0027781343	0.021376759	-0.0005032851	-2.6187675	0.045774315	0.62025	1.0	2454.34885430336
688	-3.1105084	1.3469212	-1.2637318	-5.8012266	50.0	-0.4513661	0.8223719	0.015634606	-5.141806	2756000	1.1920929e-07	0.0030057651	0.033086557	-0.0006292737	-2.6188538	0.06403796	0.67775	1.0	2457.361090183258
689	-2.9177585	1.3381863	-1.2019616	-6.018966	50.0	-0.41342172	0.78522176	0.03903574	-5.3867803	2760000	-8.392334e-08	0.0045790146	0.031746723	-0.0024672188	-2.6189332	0.045037143	0.62725	1.0	2460.3012402057648
690	-2.7302904	1.3493754	-1.2022854	-5.9691844	50.0	-0.3714913	0.7333298	0.01853939	-5.256567	2764000	9.441376e-08	0.0023944923	0.028345453	-0.0007408144	-2.6190062	0.042122237	0.6355	1.0	2463.3456325531006
691	-2.8022676	1.4041685	-1.1520947	-5.8727303	50.0	-0.38690478	0.7632977	0.010610327	-5.2015734	2768000	-4.386902e-08	0.0025600553	0.03143173	-0.0005164414	-2.619079	0.076817274	0.76775	1.0	2466.6662747859955
692	-2.9535122	1.3505473	-1.15795	-5.851304	50.0	-0.40925798	0.79588854	0.008358585	-5.1745367	2772000	-7.2479246e-08	0.0021855468	0.03783067	-0.0006940027	-2.619151	0.049948715	0.7265	1.0	2469.897168636322
693	-2.9668274	1.3290029	-1.2266512	-5.8254313	50.0	-0.3984068	0.7841399	0.017723242	-5.1364207	2776000	-3.4332274e-08	0.0019168968	0.02879101	-0.0003474108	-2.6192217	0.040432345	0.7145	1.0	2473.035810947418
694	-2.83559	1.3610604	-1.1918182	-5.9241	50.0	-0.38794532	0.7637226	0.009133995	-5.256435	2780000	-9.536743e-09	0.0016886136	0.017761273	-0.0001978568	-2.6192915	0.030463425	0.592	1.0	2476.0157265663147
695	-2.9094086	1.2771825	-1.2080401	-6.0440755	50.0	-0.39475366	0.7617822	-0.0004799068	-5.2782664	2784000	3.8146974e-09	0.0020510328	0.014884188	-0.00046643685	-2.6193452	0.02681417	0.548	1.0	2479.099145412445
696	-3.0000596	1.3822209	-1.1629083	-6.005428	50.0	-0.4185522	0.8004634	0.003591923	-5.307501	2788000	5.531311e-08	0.0020992411	0.0034020157	-0.0003712495	-2.6194172	0.017846273	0.5295	2.0	2482.144664287567
697	-2.8618	1.2826756	-1.1496292	-6.078978	50.0	-0.3971678	0.7598738	0.001378648	-5.289894	2792000	-2.3460389e-07	0.0029778485	0.0198274	-0.0008642203	-2.619617	0.044739287	0.71475	1.0	2485.121717453003
698	-2.8220062	1.2822022	-1.1574168	-5.9220896	50.0	-0.38947883	0.7534763	0.0073779393	-5.2525005	2796000	-6.008148e-08	0.0021757884	0.035179485	-0.0006428035	-2.61971	0.06804474	0.7455	1.0	2488.1340980529785
699	-2.8284333	1.3692012	-1.177631	-5.9497848	50.0	-0.38225994	0.7628587	0.019073837	-5.20387	2800000	1.3065338e-07	0.0016963303	0.03234792	-0.00025262043	-2.6198115	0.06892026	0.756	1.0	2491.127175092697
700	-2.5950432	1.3230975	-1.1727654	-5.911355	50.0	-0.3479956	0.70864016	0.03485731	-5.22889	2804000	-7.43866e-08	0.0015882049	0.03402359	-0.00033568975	-2.6199064	0.07303069	0.7585	1.0	2494.710324525833
701	-2.741592	1.1528877	-1.165959	-6.0004935	50.0	-0.36799082	0.7129062	0.0028335527	-5.2312455	2808000	-3.8146972e-08	0.0020531202	0.031865902	-0.0006027975	-2.6200137	0.044132557	0.6865	1.0	2497.8085584640503
702	-2.7353473	1.2658854	-1.1974455	-6.055348	50.0	-0.3692505	0.7210699	0.002857536	-5.3331714	2812000	-1.487732e-07	0.0019886647	0.020024179	-0.0004413115	-2.6201067	0.029149001	0.58125	1.0	2500.9245188236237
703	-2.8632739	1.437364	-1.2260147	-5.9857063	50.0	-0.3896627	0.776081	0.009163	-5.2554264	2816000	-1.6593933e-07	0.002823927	0.016192738	-0.0009182587	-2.6202085	0.03076165	0.51575	1.0	2503.9905245304108
704	-2.7643185	1.3887283	-1.1953305	-5.942136	50.0	-0.3784951	0.7551305	0.014817255	-5.2334485	2820000	2.2888184e-08	0.0021569708	0.021279832	-0.0005525062	-2.620309	0.03304443	0.6495	1.0	2507.1069152355194
705	-2.6971805	1.3163866	-1.1741066	-6.0413837	50.0	-0.3690959	0.7279137	0.015664225	-5.347905	2824000	1.1634827e-07	0.0027944937	0.025159713	-0.0008356222	-2.620411	0.04238341	0.58075	1.0	2510.0732312202454
706	-2.7531533	1.3036813	-1.2252362	-5.9906745	50.0	-0.38803723	0.74646807	0.032963794	-5.2584047	2828000	-1.7738343e-07	0.0023188961	0.026811186	-0.00043191027	-2.6205053	0.048733354	0.6125	1.0	2513.1127610206604
707	-2.7205307	1.2318864	-1.1819139	-5.957762	50.0	-0.36853626	0.72255164	0.030195877	-5.2466826	2832000	1.2397766e-07	0.0017218144	0.019768467	-0.00031651452	-2.620589	0.024304967	0.5995	1.0	2516.0705156326294
708	-3.0079968	1.3901179	-1.2553962	-5.9375267	50.0	-0.42346737	0.8143325	0.0040465463	-5.2638927	2836000	1.6307831e-07	0.0023712674	0.021423297	-0.0005928774	-2.6206803	0.049495	0.7075	1.0	2519.028939962387
709	-2.7541625	1.4157788	-1.240998	-6.018221	50.0	-0.37796032	0.7609191	0.022760123	-5.284134	2840000	-4.9591065e-08	0.0017571273	0.02036903	-0.00038502074	-2.6207602	0.039702382	0.6285	1.0	2521.9957201480865
710	-2.9318936	1.3853675	-1.1809394	-5.9912324	50.0	-0.39950207	0.7915779	0.0040089097	-5.308162	2844000	3.051758e-08	0.0018135294	0.018058645	-0.00027945498	-2.6208494	0.045798797	0.5905	1.0	2525.011793613434
711	-2.8141246	1.3623234	-1.1639783	-5.9967146	50.0	-0.37713963	0.74707603	0.010962069	-5.3073325	2848000	-7.152558e-08	0.0048648543	0.018852388	-0.0019607989	-2.6209376	0.025437407	0.5465	1.0	2527.938465118408
712	-2.8018467	1.371203	-1.3306433	-6.140469	50.0	-0.3944337	0.75975686	0.019063821	-5.3157334	2852000	-2.3460389e-07	0.0027375363	0.016243873	-0.0008423332	-2.6210215	0.019191891	0.46575	1.0	2531.1128273010254
713	-2.6732726	1.1721954	-1.2021306	-6.030223	50.0	-0.3695087	0.7170601	0.017419195	-5.3295236	2856000	-2.861023e-09	0.0026327006	0.04313256	-0.00090039603	-2.6211061	0.052010812	0.48425	1.0	2534.432106256485
714	-2.846875	1.2479191	-1.16209	-5.932141	50.0	-0.39395434	0.76340425	0.012886142	-5.220569	2860000	-4.5776368e-08	0.0021861724	0.024303755	-0.000858712	-2.6212041	0.02824628	0.54275	1.0	2537.309732198715
715	-2.8453574	1.2593697	-1.2270025	-5.956505	50.0	-0.38698778	0.75467026	-0.0025733188	-5.2224584	2864000	-1.1062622e-07	0.0014785763	0.0122996485	-0.00012543146	-2.6212852	0.021452727	0.39925	1.0	2540.270716190338
716	-2.701831	1.3644049	-1.2064297	-5.996406	50.0	-0.36886224	0.7412803	-0.0009961016	-5.308942	2868000	1.4686584e-07	0.0014193361	0.014829477	-0.00013261114	-2.621371	0.026087845	0.471	1.0	2543.260528087616
717	-2.8630867	1.5169377	-1.1729307	-5.9840527	50.0	-0.39621717	0.7974702	-0.00027698837	-5.2796583	2872000	2.0694732e-07	0.00166642	0.014122807	-0.00017753872	-2.6214619	0.01829319	0.38775	1.0	2546.2603991031647
718	-2.836177	1.3534273	-1.1840653	-5.938321	50.0	-0.38143653	0.7590529	0.0045820475	-5.2445803	2876000	-1.3160705e-07	0.0018186596	0.010450441	-0.00019310822	-2.6215537	0.020100864	0.467	1.0	2550.132213115692
719	-2.9146843	1.570942	-1.1739368	-6.2410097	50.0	-0.39833483	0.7997791	0.008623442	-5.349013	2880000	9.441376e-08	0.0035567214	0.022652442	-0.0010237619	-2.6216543	0.030191226	0.56725	2.0	2553.1494386196136
720	-2.7594726	1.1931542	-1.2077316	-5.9480796	50.0	-0.383237	0.7269613	0.0014431626	-5.19929	2884000	7.629395e-09	0.0023850456	0.036676843	-0.0006971654	-2.621853	0.03755017	0.66275	1.0	2558.5201709270477
721	-2.8215346	1.2475355	-1.2130122	-6.2241874	50.0	-0.38292012	0.74080515	0.012488134	-5.355187	2888000	1.6975403e-07	0.0018745214	0.023434633	-0.0003193781	-2.6219296	0.046689086	0.65475	1.0	2564.2457802295685
722	-2.9723558	1.4294301	-1.3441058	-5.844372	50.0	-0.4051311	0.79624385	0.0015063584	-5.2125382	2892000	2.0980835e-08	0.0020135667	0.018896163	-0.00029126834	-2.6220317	0.04174544	0.66525	1.0	2567.320215702057
723	-2.787809	1.1745652	-1.2706242	-6.0382667	50.0	-0.37848052	0.7229173	0.002265595	-5.336634	2896000	-8.773804e-08	0.003361138	0.023174945	-0.0014871184	-2.6221473	0.034876358	0.5735	1.0	2570.160138607025
724	-2.7348294	1.2716601	-1.2137946	-5.8051105	50.0	-0.37728828	0.73409855	0.0065689143	-5.1232486	2900000	-1.3351441e-08	0.002456254	0.030287584	-0.0010112334	-2.622226	0.051379956	0.5885	1.0	2573.034626722336
725	-2.9502032	1.4011186	-1.2844682	-6.151125	50.0	-0.40734327	0.7936395	0.012865106	-5.318646	2904000	-5.531311e-08	0.002064643	0.033707835	-0.00036113872	-2.6223166	0.07976765	0.706	1.0	2575.910350084305
726	-2.7805653	1.3611836	-1.2536508	-5.812139	50.0	-0.3785517	0.7446153	0.0066821575	-5.1174307	2908000	-5.3405763e-08	0.0041911057	0.02859573	-0.0022842453	-2.6224082	0.03488987	0.55	1.0	2578.7258710861206
727	-2.7448208	1.2376887	-1.2712718	-5.8605847	50.0	-0.37699786	0.7195588	0.015721586	-4.9870715	2912000	-1.3351441e-08	0.0023544643	0.022623071	-0.0006946444	-2.622498	0.032310683	0.52125	1.0	2581.5361948013306
728	-2.991409	1.3859733	-1.2336279	-5.9361343	50.0	-0.4152832	0.8039469	0.0068714824	-5.3141255	2916000	-1.525879e-08	0.0019702187	0.019867206	-0.00037780812	-2.6225805	0.038776938	0.42	1.0	2584.485541343689
729	-2.9702854	1.4802359	-1.169047	-5.9819617	50.0	-0.41448817	0.81206685	5.778484e-05	-5.2578034	2920000	1.0681153e-07	0.0018177414	0.011975649	-0.0002707102	-2.6226797	0.026398743	0.45575	1.0	2587.579139471054
730	-2.860456	1.287465	-1.2153511	-5.97449	50.0	-0.39207423	0.76067275	0.002926562	-5.262004	2924000	5.9127807e-08	0.0015846842	0.010633437	-0.0001525149	-2.6227705	0.03461277	0.6265	1.0	2590.6978056430817
731	-2.7045276	1.2232329	-1.2179127	-5.9728255	50.0	-0.36699584	0.71637017	0.002880592	-5.2799034	2928000	1.7738343e-07	0.0015271759	0.018220194	-0.00022924657	-2.622857	0.047669508	0.66	1.0	2593.7284264564514
732	-2.9672325	1.4577653	-1.266591	-6.079305	50.0	-0.41129768	0.8052847	0.0012304857	-5.2776537	2932000	-1.4686584e-07	0.0017040438	0.01687733	-0.00017385313	-2.6229522	0.027321212	0.57525	1.0	2596.74990606308
733	-2.8466988	1.3345411	-1.1556894	-5.8808165	50.0	-0.3919125	0.7660532	0.00017740205	-5.224083	2936000	-7.6293944e-08	0.0016609095	0.015601751	-0.00016430963	-2.623024	0.03516767	0.62825	1.0	2599.7308871746063
734	-2.8634691	1.3454494	-1.349705	-6.036411	50.0	-0.400146	0.7679288	0.0033914447	-5.3171225	2940000	9.536743e-09	0.0019127427	0.015027965	-0.00031068642	-2.6230907	0.048639003	0.6485	1.0	2602.766448497772
735	-2.8123932	1.4315985	-1.1840916	-5.916421	50.0	-0.38786185	0.77143466	0.00462595	-5.07589	2944000	4.5776368e-08	0.0020614355	0.021928085	-0.0003311995	-2.6231759	0.06438505	0.6445	1.0	2605.85661816597
736	-3.0846093	1.405676	-1.2655879	-6.045547	50.0	-0.43088126	0.8195479	0.009053575	-5.354424	2948000	-3.1471252e-08	0.0041368497	0.032461282	-0.0016048588	-2.623257	0.040530816	0.57675	1.0	2609.501677751541
737	-2.8714418	1.2759942	-1.2176279	-5.945185	50.0	-0.39366144	0.74786377	0.0024439543	-5.245663	2952000	5.722046e-09	0.002425312	0.025421683	-0.0005498957	-2.623333	0.03064476	0.573	1.0	2612.99037027359
738	-2.9714024	1.3497775	-1.1758358	-6.0407715	50.0	-0.42996714	0.78317416	0.008043952	-5.289193	2956000	3.71933e-08	0.0033508684	0.027361749	-0.0010533982	-2.62342	0.03088458	0.61425	1.0	2616.081513404846
739	-2.4231143	1.1344447	-1.1511661	-5.899253	50.0	-0.34545007	0.6386926	0.0097593535	-5.1817007	2960000	-1.9073486e-08	0.0032429283	0.04656266	-0.0013401592	-2.6234841	0.06373826	0.6275	1.0	2619.0215690135956
740	-2.730226	1.3083403	-1.2093556	-6.0582466	50.0	-0.3746199	0.7352641	0.027159283	-5.3353944	2964000	1.0585785e-07	0.0027325195	0.029862832	-0.0013462473	-2.623547	0.07290321	0.58425	1.0	2622.0245780944824
741	-2.6058977	1.3249457	-1.2527138	-6.0346484	50.0	-0.3540362	0.708754	0.0077505	-5.3303094	2968000	6.2942505e-08	0.0014772525	0.018931065	-0.00019902328	-2.623621	0.04173158	0.543	1.0	2625.00377035141
742	-2.7719805	1.4081111	-1.1892595	-6.037301	50.0	-0.37586075	0.7578664	0.0045590214	-5.2638726	2972000	-9.346008e-08	0.0017812115	0.016320683	-0.00026634126	-2.623683	0.03225274	0.5205	1.0	2627.954035282135
743	-2.7818313	1.3378563	-1.1739928	-6.0014644	50.0	-0.3744465	0.7406923	-0.00092842616	-5.2845635	2976000	-8.773804e-08	0.0030103312	0.04209351	-0.0010776615	-2.6237392	0.058379307	0.531	2.0	2630.853525876999
744	-2.789	1.2013365	-1.17313	-5.5821877	50.0	-0.38243017	0.73104435	0.009048337	-4.907637	2980000	-1.9073487e-07	0.0028093616	0.051083334	-0.0007799766	-2.6238525	0.087133266	0.697	1.0	2633.896448135376
745	-2.5669098	1.2624891	-1.1666768	-5.9732513	50.0	-0.34105682	0.692914	0.0035518575	-5.144293	2984000	6.866455e-08	0.0020747613	0.023601407	-0.00067214714	-2.623907	0.019748397	0.53625	1.0	2636.9033994674683
746	-2.9273567	1.3927925	-1.2904981	-6.0752416	50.0	-0.39945966	0.7862048	0.011105413	-5.3335977	2988000	1.2779236e-07	0.00282325	0.018499801	-0.0011239575	-2.6239684	0.029073581	0.5615	1.0	2641.70463347435
747	-2.9125438	1.2957076	-1.3199278	-6.0998063	50.0	-0.40117058	0.7717672	0.007121986	-5.3459125	2992000	-2.9563903e-08	0.0023651754	0.015330347	-0.00034004566	-2.624044	0.017901918	0.5445	1.0	2644.8380806446075
748	-2.6313233	1.0940396	-1.1992862	-5.969128	50.0	-0.3543462	0.6861951	0.014660021	-5.2912254	2996000	-6.771088e-08	0.001904647	0.015428998	-0.00038877898	-2.6241083	0.021920215	0.55125	1.0	2647.903996706009
749	-2.8419125	1.4442489	-1.1555696	-6.10495	50.0	-0.38846716	0.7799415	0.011941256	-5.330122	3000000	1.3256073e-07	0.0019298472	0.010066835	-0.00035096577	-2.624175	0.01671428	0.5095	1.0	2650.9372737407684
750	-2.9134946	1.3861578	-1.2364686	-5.9861913	50.0	-0.39588904	0.7826581	0.006352106	-5.269816	3004000	-4.7683717e-08	0.0024813719	0.012348987	-0.0005043447	-2.6242273	0.03949092	0.592	1.0	2653.85595870018
751	-2.972073	1.2896152	-1.2748456	-5.826803	50.0	-0.4003788	0.77977145	0.022526251	-5.148739	3008000	8.010864e-08	0.0022040142	0.02507455	-0.00038462167	-2.624279	0.07057169	0.6865	1.0	2656.888823747635
752	-2.8313909	1.3302854	-1.1645923	-5.945102	50.0	-0.38099688	0.75853264	0.006251527	-5.279696	3012000	-1.2016297e-07	0.0016311473	0.028584234	-0.00018438546	-2.6243503	0.08367721	0.761	1.0	2659.84800863266
753	-2.8045216	1.0498184	-1.1510671	-5.6780677	50.0	-0.36952493	0.70751315	0.00034489483	-4.9714127	3016000	9.536743e-09	0.0029904854	0.035195332	-0.0009403855	-2.6244202	0.058630943	0.60775	1.0	2662.8011910915375
754	-2.7139397	1.1299388	-1.2945715	-5.8573694	50.0	-0.3739675	0.7065217	0.0018660892	-5.1090374	3020000	-6.771088e-08	0.00207659	0.02217476	-0.00060116197	-2.624491	0.02518912	0.42175	1.0	2665.8207523822784
755	-2.7593884	1.2732126	-1.1796473	-5.696011	50.0	-0.37567198	0.73558205	0.005056422	-5.006449	3024000	3.051758e-08	0.001955323	0.019244691	-0.000446648	-2.6245704	0.02443559	0.507	1.0	2668.728048801422
756	-2.6876338	1.1533642	-1.4206642	-5.9042683	50.0	-0.36600512	0.7107484	0.0030527748	-5.163141	3028000	1.0299683e-07	0.0015246351	0.010457183	-0.0002639772	-2.6246533	0.025040766	0.54425	1.0	2671.7134132385254
757	-3.0678618	1.5750272	-1.1706467	-6.012099	50.0	-0.42955276	0.8530692	0.010244461	-5.345007	3032000	-6.866455e-08	0.001797447	0.008308476	-0.0002020814	-2.624746	0.021822989	0.50775	1.0	2678.258457183838
758	-2.5210605	1.205147	-1.1699634	-5.948042	50.0	-0.34064168	0.6801853	0.008547537	-5.229571	3036000	-2.07901e-07	0.0012936563	0.010963945	-0.00013902399	-2.6248448	0.025880525	0.473	1.0	2681.400952100754
759	-2.7901726	1.4761201	-1.2322061	-6.2407136	50.0	-0.3797309	0.7710452	0.003083989	-5.2782125	3040000	-1.4495849e-07	0.002274681	0.018172618	-0.000291005	-2.6249297	0.04276592	0.53225	1.0	2684.3184311389923
760	-2.8532338	1.4320021	-1.1971711	-6.120049	50.0	-0.38076922	0.77133083	0.0323477	-5.2524147	3044000	2.8610229e-08	0.002223013	0.018453078	-0.00049061084	-2.6250303	0.0224416	0.4165	1.0	2687.348641395569
761	-2.6878247	1.2711906	-1.2044662	-5.984326	50.0	-0.3684523	0.7193565	0.0074289963	-5.233033	3048000	-4.5776368e-08	0.0023216878	0.017250713	-0.0006951472	-2.625129	0.03346738	0.6275	1.0	2690.281322479248
762	-2.898853	1.269715	-1.2029983	-6.0031247	50.0	-0.39969	0.76803213	0.012091074	-5.3773274	3052000	-1.2969971e-07	0.002788672	0.03204146	-0.00092152145	-2.6252239	0.041146778	0.61875	1.0	2693.2246170043945
763	-2.7292738	1.2724997	-1.2473927	-6.0722504	50.0	-0.3703065	0.72981006	0.007241538	-5.2595515	3056000	2.861023e-09	0.0021434755	0.02188964	-0.0006738886	-2.6253262	0.020597462	0.511	1.0	2696.179414987564
764	-2.9757564	1.3768015	-1.2518103	-6.0917635	50.0	-0.4006569	0.7905188	0.012606265	-5.333902	3060000	7.629395e-09	0.0018918307	0.012505158	-0.0002827777	-2.6254258	0.016012141	0.54825	1.0	2699.1487951278687
765	-2.9517536	1.3399891	-1.2586997	-6.0480824	50.0	-0.39682594	0.77832097	0.0027510114	-5.3158035	3064000	1.1444092e-08	0.0030719019	0.007686672	-0.00059608254	-2.625539	0.020678155	0.44	1.0	2702.000972509384
766	-2.6848207	1.2628314	-1.2115742	-5.909755	50.0	-0.367615	0.7199984	0.022024402	-5.2452106	3068000	2.861023e-09	0.001636094	0.008139926	-0.000289983	-2.6256516	0.019866364	0.407	1.0	2704.921567440033
767	-2.8921216	1.4166998	-1.192417	-5.9341965	50.0	-0.38843665	0.78382033	0.019584572	-5.2260103	3072000	5.722046e-09	0.0023256224	0.015477926	-0.00043438142	-2.6257727	0.034029417	0.53625	1.0	2707.974603176117
768	-2.8535228	1.474499	-1.2003014	-6.0229783	50.0	-0.39410487	0.7888049	0.011898883	-5.272818	3076000	-4.9591065e-08	0.001908801	0.021603078	-0.00027790316	-2.6258945	0.04142233	0.5375	1.0	2710.9381279945374
769	-2.8187656	1.5014069	-1.2657628	-6.167861	50.0	-0.38560912	0.77742505	0.007949935	-5.29664	3080000	2.2029877e-07	0.0029345439	0.026033413	-0.0010628446	-2.626026	0.04043997	0.582	1.0	2713.8453435897827
770	-2.5684845	1.2729127	-1.1622285	-5.8208723	50.0	-0.35055622	0.6954818	0.026348095	-5.2630877	3084000	1.7929077e-07	0.0029245063	0.020087864	-0.0011652114	-2.6261425	0.036903568	0.587	1.0	2716.694000482559
771	-2.745296	1.3343942	-1.1571008	-6.003348	50.0	-0.37014437	0.73706424	0.0091306325	-5.284565	3088000	1.5449524e-07	0.0020549004	0.024038332	-0.00059047237	-2.6262596	0.04161275	0.659	1.0	2719.5973944664
772	-2.8470035	1.3204907	-1.2499878	-5.973708	50.0	-0.37803254	0.75734186	0.002263438	-5.2393346	3092000	-2.7656554e-08	0.0015380761	0.015203364	-0.00015227299	-2.6263628	0.019327728	0.4915	1.0	2722.4992377758026
773	-2.8669899	1.2246292	-1.176561	-5.795976	50.0	-0.37741497	0.7465073	0.0019459818	-5.1068077	3096000	-1.411438e-07	0.0015302749	0.008949445	-0.00011591124	-2.6264653	0.030943405	0.57775	1.0	2725.355916261673
774	-2.7528594	1.3843955	-1.260248	-6.048826	50.0	-0.3686094	0.74403334	0.0017957669	-5.3003693	3100000	-1.3923645e-07	0.001552134	-0.006833739	-0.00011443591	-2.6265752	0.004768587	0.1725	79.0	2729.0598344802856
775	-2.925523	1.3263186	-1.1585546	-6.021298	50.0	-0.39379066	0.7754835	0.0006796792	-5.2859483	3104000	-9.727478e-08	0.0015668635	0.00015105057	-0.00011198013	-2.6336591	0.0161182	0.35025	2.0	2731.940128803253
776	-2.9016042	1.2786789	-1.3403542	-5.801364	50.0	-0.38685334	0.76236856	0.0008281488	-5.1470447	3108000	-7.629395e-09	0.0016468677	-0.007470625	-0.00015642447	-2.6337774	0.0028162352	0.133	79.0	2735.518070936203
777	-2.7925632	1.3616296	-1.2483287	-5.8712544	50.0	-0.37602594	0.75299525	0.0019381959	-5.182272	3112000	-1.0585785e-07	0.0014921357	-0.0059116995	-0.00012816803	-2.6393926	0.003045149	0.212	79.0	2740.4081161022186
778	-2.9117649	1.4746301	-1.178982	-5.979361	50.0	-0.3920245	0.79430574	0.002985105	-5.2688627	3116000	2.479553e-07	0.0016756702	-0.0023502999	-0.00012472481	-2.6395595	0.006947043	0.32625	79.0	2745.5341613292694
779	-2.7662473	1.2786022	-1.1766595	-5.579578	50.0	-0.36588675	0.7305928	0.0032898188	-4.9202323	3120000	-4.196167e-08	0.0016144838	-0.004961115	-0.00023599004	-2.6410134	0.003413085	0.169	79.0	2748.9771888256073
780	-2.7684662	1.2743485	-1.1752739	-5.785563	50.0	-0.37147424	0.73226136	0.0002883114	-5.0526657	3124000	-1.2779236e-07	0.0016444618	-0.004646065	-0.00018270849	-2.651292	0.0021737195	0.12075	79.0	2752.553744316101
781	-2.973806	1.3037491	-1.1473063	-5.7725625	50.0	-0.39628145	0.78255385	0.007908961	-5.092164	3128000	0.0	0.0018139782	0.0043140757	-0.00024149928	-2.6572657	0.019012725	0.46075	36.0	2756.0220828056335
782	-2.5993145	1.266368	-1.1550584	-5.815603	50.0	-0.34586427	0.6968713	0.00023590773	-5.13809	3132000	-2.5558472e-07	0.0014305855	0.005309334	-0.00016707636	-2.659934	0.019535888	0.476	58.0	2759.5905277729034
783	-2.712371	1.394775	-1.1860416	-5.859297	50.0	-0.3594442	0.7387128	0.004526004	-5.1696224	3136000	-9.059906e-08	0.0015188461	0.011599489	-0.00015018345	-2.6623352	0.026599262	0.5995	1.0	2762.483912229538
784	-2.5566573	1.1575441	-1.2005638	-5.7055984	50.0	-0.33599803	0.67223024	0.0007670373	-4.9635057	3140000	3.8146974e-09	0.0013272803	0.0034378166	-0.0001393673	-2.6623933	0.018537857	0.53575	6.0	2765.4548456668854
785	-2.7728238	1.2980554	-1.206325	-6.0335455	50.0	-0.37644327	0.7474191	0.0029395875	-5.211209	3144000	4.005432e-08	0.0013923431	0.008622404	-0.0001398276	-2.662687	0.028717868	0.522	1.0	2768.31751537323
786	-3.208601	1.4648433	-1.1846071	-6.030067	50.0	-0.4355904	0.8531235	0.002812991	-5.268877	3148000	9.1552735e-08	0.0021643385	0.012100154	-0.0002744547	-2.662729	0.0335941	0.59075	2.0	2771.622385263443
787	-2.7987504	1.3864192	-1.1686604	-5.9252844	50.0	-0.37639692	0.7573001	0.028522817	-5.225351	3152000	9.918213e-08	0.0016956716	0.011474129	-0.00025387725	-2.6628478	0.03890869	0.44525	1.0	2774.8423807621
788	-2.6436877	1.2447493	-1.2825288	-6.028661	50.0	-0.34995374	0.703998	0.0015154816	-5.259688	3156000	7.43866e-08	0.0013307369	0.011685877	-0.00010704622	-2.6629	0.022420134	0.51675	1.0	2777.8484811782837
789	-2.6455898	1.3203589	-1.1597896	-5.952837	50.0	-0.345807	0.710164	0.0040867925	-5.2859316	3160000	-2.0980835e-08	0.0017438048	0.005231527	-0.00021484762	-2.6629345	0.017259292	0.58725	37.0	2781.004255056381
790	-2.5671947	1.2954978	-1.1747943	-6.0325828	50.0	-0.3474145	0.7037915	0.0022302605	-5.3169637	3164000	-1.3351441e-08	0.0014031923	0.021103127	-0.00015589385	-2.6659715	0.033215754	0.6725	1.0	2783.9732146263123
791	-2.8175693	1.4874206	-1.2389275	-5.997161	50.0	-0.37952414	0.7746108	0.0023970958	-5.259156	3168000	-1.9073487e-09	0.0016551762	0.01816133	-0.00016986975	-2.6660368	0.04372963	0.6945	1.0	2786.9004271030426
792	-2.9417336	1.3850086	-1.1953725	-5.9538302	50.0	-0.39291435	0.7831326	0.0022045802	-5.2375517	3172000	4.196167e-08	0.0020737813	0.02472971	-0.00040710438	-2.6661093	0.049775086	0.682	1.0	2789.8971371650696
793	-2.600521	1.2910188	-1.1583084	-5.9160194	50.0	-0.34240392	0.69887143	0.021729272	-5.2157407	3176000	2.6702882e-08	0.0016266936	0.019395554	-0.00029804208	-2.666168	0.038277484	0.67675	1.0	2792.9880974292755
794	-2.7502995	1.4122503	-1.2124352	-5.9864426	50.0	-0.36811805	0.7430339	0.0029437467	-5.269498	3180000	6.484986e-08	0.003630593	0.0250858	-0.0014212152	-2.666236	0.04159147	0.56825	1.0	2795.9018816947937
795	-2.624823	1.2110924	-1.1649882	-5.780735	50.0	-0.35749736	0.7008491	0.0120820645	-5.080966	3184000	-7.8201296e-08	0.0025749055	0.0256794	-0.0010320072	-2.6663043	0.03390403	0.4495	1.0	2798.838772535324
796	-2.9604669	1.3783416	-1.1982079	-5.8402386	50.0	-0.406343	0.7904135	0.011413185	-5.118574	3188000	3.051758e-08	0.0022411419	0.011976479	-0.00063323346	-2.6663818	0.019309647	0.39025	1.0	2802.6467871665955
797	-2.7263846	1.3281077	-1.1906341	-5.838451	50.0	-0.36267716	0.7298163	9.2145056e-05	-5.1288342	3192000	9.441376e-08	0.0017304306	0.0022312677	-0.00028716412	-2.666461	0.0181794	0.4985	8.0	2805.743766784668
798	-2.5720327	1.1853981	-1.1477365	-5.937459	50.0	-0.3519159	0.689067	0.0018993244	-5.2510138	3196000	7.2479246e-08	0.0012421699	0.003084694	-0.000118216034	-2.667044	0.01713809	0.40825	2.0	2808.9437294006348
799	-2.897187	1.439548	-1.1631778	-5.858459	50.0	-0.3908075	0.7920578	0.001642162	-5.175868	3200000	3.6239623e-08	0.0016315494	-0.0059797782	-0.00012333447	-2.6672058	0.0038778812	0.15025	79.0	2812.6686112880707
800	-2.7445495	1.3444991	-1.1858758	-5.882122	50.0	-0.36638653	0.73894984	0.0010643676	-5.1617317	3204000	-2.8610229e-08	0.0024591265	0.005318444	-0.0005592735	-2.6747944	0.015220782	0.4695	8.0	2815.6768283843994
801	-2.8244154	1.2473179	-1.1890097	-6.050622	50.0	-0.3804768	0.7466966	0.015980724	-5.3349285	3208000	-8.2015994e-08	0.0015302002	-0.0026542493	-0.00016923074	-2.6753092	0.00780009	0.3585	79.0	2819.26021027565
802	-2.7750452	1.3717173	-1.2097704	-6.0720115	50.0	-0.372051	0.7483669	-0.00012594834	-5.318487	3212000	-8.2015994e-08	0.0017234308	0.002222784	-0.00022892084	-2.678561	0.015553633	0.358	14.0	2822.356661081314
803	-3.1368625	1.4877639	-1.2152814	-5.791187	50.0	-0.43351868	0.84938985	0.008176368	-5.111874	3216000	1.0299683e-07	0.0021452622	0.0012077389	-0.00027902646	-2.6797843	0.016400723	0.416	57.0	2825.8450849056244
804	-2.6281433	1.2415811	-1.1815907	-5.9044914	50.0	-0.34709638	0.7000307	0.0049393773	-5.21113	3220000	-2.002716e-07	0.0014060044	-0.0030718937	-0.00012282794	-2.6860154	0.0050238534	0.20325	79.0	2830.2324655056
805	-2.8890903	1.4419653	-1.1771487	-6.0075192	50.0	-0.38977435	0.7858099	0.0015967544	-5.258793	3224000	-9.536743e-09	0.001815096	-0.0048656426	-0.00023277488	-2.6934483	0.005570094	0.2365	79.0	2833.8779590129852
806	-2.9071636	1.4625084	-1.1995199	-5.93591	50.0	-0.39491704	0.7954153	0.008253822	-5.1892247	3228000	1.6975403e-07	0.0017380894	-0.0042981724	-0.00020079187	-2.702167	0.0074703465	0.1995	79.0	2837.4652411937714
807	-2.7403798	1.4488124	-1.212179	-6.0564485	50.0	-0.36881664	0.757291	0.0050307047	-5.31222	3232000	8.2015994e-08	0.0014869509	-0.005132708	-9.350327e-05	-2.706624	0.0026594347	0.1695	79.0	2841.065207719803
808	-2.8021722	1.3745396	-1.1743091	-5.981759	50.0	-0.37484172	0.75736874	0.0023645293	-5.3733497	3236000	9.727478e-08	0.0015840024	0.005414665	-0.00013419322	-2.7155666	0.018269485	0.57375	1.0	2843.985012769699
809	-2.9419465	1.3554022	-1.2400628	-6.0012197	50.0	-0.39509898	0.78018606	0.003165055	-5.2714696	3240000	-8.964538e-08	0.0020156007	-0.004531551	-0.0003758755	-2.71565	0.005202866	0.2295	79.0	2847.550585746765
810	-2.7626286	1.2690972	-1.1736338	-5.8336935	50.0	-0.3702	0.73674685	0.007822717	-5.143009	3244000	4.005432e-08	0.00188086	0.0076864264	-0.0003571856	-2.7165954	0.016165944	0.414	2.0	2851.196939229965
811	-2.848561	1.360282	-1.2393333	-5.998743	50.0	-0.3807754	0.76337236	0.015318003	-5.301007	3248000	8.2015994e-08	0.0016370345	0.013630429	-0.00022207864	-2.7166348	0.03113098	0.595	1.0	2854.1746389865875
812	-2.65868	1.2754346	-1.1345457	-5.8774724	50.0	-0.34680015	0.70813644	0.0020163096	-5.1207614	3252000	2.6702882e-08	0.0022680121	0.0074104196	-0.00060263637	-2.7166638	0.01964315	0.49325	5.0	2857.2266430854797
813	-3.0231874	1.3716033	-1.1657116	-6.0171256	50.0	-0.40397936	0.80869776	0.0052684546	-5.325451	3256000	1.8119812e-07	0.0019898126	0.022726977	-0.0003656058	-2.716839	0.03615361	0.6285	1.0	2860.3434710502625
814	-2.8977647	1.5090853	-1.1511698	-6.0337443	50.0	-0.38784882	0.7937053	0.006846346	-5.2930484	3260000	-4.5776368e-08	0.0019096904	0.021512551	-0.00029733905	-2.7168999	0.03835475	0.61575	1.0	2863.260589838028
815	-2.7978332	1.4469223	-1.1581224	-5.8977284	50.0	-0.3770678	0.7687248	0.021009374	-5.1895003	3264000	-5.3405763e-08	0.0016931602	0.016676506	-0.00020185544	-2.7169707	0.026317092	0.5585	1.0	2866.151666164398
816	-2.7327034	1.4554099	-1.1625465	-5.9079614	50.0	-0.36460823	0.75283086	0.016249765	-5.188635	3268000	-1.7166137e-08	0.0021440194	0.008376179	-0.00037839764	-2.7170243	0.020801866	0.48875	1.0	2868.7236845493317
817	-2.878406	1.4380296	-1.2489253	-5.838295	50.0	-0.38385412	0.7764724	0.016647937	-5.1542587	3272000	-6.484986e-08	0.0021310076	0.0027507297	-0.0004542088	-2.717083	0.0154800005	0.39875	3.0	2871.2237877845764
818	-2.9314873	1.4564027	-1.2220688	-6.0111923	50.0	-0.39291608	0.79382527	0.008966664	-5.293448	3276000	-2.3937224e-07	0.0017625345	-0.0060046017	-0.00018300372	-2.7172966	0.0057148756	0.24125	79.0	2874.3118093013763
819	-2.848466	1.4439042	-1.1865667	-5.9858103	50.0	-0.38585797	0.78099984	0.0014740992	-5.274601	3280000	-1.487732e-07	0.0016714574	0.0030386276	-0.00020385487	-2.7195113	0.019387452	0.51775	30.0	2877.6087262630463
820	-3.0685458	1.4329946	-1.1606141	-5.9044037	50.0	-0.4077711	0.8181294	0.009990839	-5.2047954	3284000	-3.4332274e-08	0.0018230159	-0.0064077643	-0.00019881991	-2.717665	0.0041186344	0.16425	79.0	2880.8176882267
821	-2.8005052	1.319527	-1.2281865	-5.9311504	50.0	-0.36917713	0.7477749	0.0023706853	-5.203217	3288000	5.531311e-08	0.0015194747	0.000591816	-0.000108528766	-2.7244568	0.018648842	0.44725	30.0	2883.841413497925
822	-2.8502893	1.3371639	-1.1465901	-5.9316278	50.0	-0.37430072	0.76084656	0.0017002821	-5.198472	3292000	-6.866455e-08	0.0016745465	0.009724402	-0.00019769836	-2.726419	0.019392058	0.6125	1.0	2886.814615726471
823	-3.0118182	1.4418372	-1.1483655	-6.0020285	50.0	-0.40007874	0.8062263	0.002818592	-5.28305	3296000	1.1444092e-08	0.0017132268	0.010181097	-0.00011334242	-2.726462	0.022044042	0.574	1.0	2890.442802667618
824	-2.8629906	1.4543922	-1.1702615	-5.9125905	50.0	-0.3787229	0.7793084	0.0038274322	-5.2331104	3300000	2.8610229e-08	0.0021084892	0.0059457216	-0.0003701558	-2.7265098	0.017074851	0.46475	3.0	2893.386075735092
825	-2.6347249	1.2581475	-1.1247354	-5.855185	50.0	-0.34813184	0.7028927	0.004496943	-5.1927867	3304000	-1.1253357e-07	0.0016576495	0.008641552	-0.00035663298	-2.7266228	0.017177628	0.404	13.0	2896.7882244586945
826	-2.8407092	1.294968	-1.2332232	-5.8945675	50.0	-0.3730986	0.75011575	0.003249742	-5.199284	3308000	1.9073486e-08	0.0015821698	0.0076306593	-0.00016688183	-2.7272422	0.03679142	0.505	1.0	2899.695080280304
827	-2.854741	1.3456899	-1.3000888	-5.9697056	50.0	-0.3768386	0.7589119	0.0034016334	-5.237967	3312000	6.67572e-08	0.0015691265	0.009704317	-8.077535e-05	-2.7272959	0.03156945	0.58575	1.0	2902.661876678467
828	-2.901289	1.311147	-1.1968653	-5.969829	50.0	-0.38398263	0.75833845	0.0017086882	-5.25085	3316000	3.1471252e-08	0.0028173756	0.011115815	-0.0010775665	-2.727348	0.015063712	0.4775	2.0	2905.510142803192
829	-2.9936252	1.5461586	-1.1489503	-5.9301677	50.0	-0.40434968	0.81722045	0.004007999	-5.2093444	3320000	-2.0980835e-08	0.0019631581	0.013665308	-0.00026445475	-2.72747	0.03711736	0.627	1.0	2908.3910398483276
830	-2.8011193	1.5227133	-1.1632901	-5.933388	50.0	-0.37955713	0.7802982	0.003430156	-5.227282	3324000	2.3841858e-07	0.0016678487	0.008414492	-0.00022812479	-2.7275186	0.029811716	0.5625	1.0	2911.2996509075165
831	-2.7156181	1.299342	-1.1818388	-6.0200047	50.0	-0.36603767	0.7323276	0.0009503197	-5.281714	3328000	1.7738343e-07	0.0015706718	0.0092466185	-0.00022579334	-2.7275662	0.038569536	0.62625	1.0	2917.862324953079
832	-2.7298656	1.3231972	-1.2352713	-5.821255	50.0	-0.36610723	0.7355787	0.0045350194	-5.168085	3332000	-1.6593933e-07	0.0022685123	0.015452492	-0.00062853633	-2.72761	0.029409843	0.60925	1.0	2921.0069496631622
833	-2.7474282	1.3541644	-1.1767279	-5.9340105	50.0	-0.36589745	0.7442194	0.026564004	-5.228788	3336000	1.6593933e-07	0.0017749036	0.016898815	-0.0003434444	-2.7276611	0.022765543	0.52325	1.0	2924.026054620743
834	-2.647663	1.1629204	-1.1775115	-5.8146367	50.0	-0.3506738	0.6959316	0.012004627	-5.1241555	3340000	3.6144257e-07	0.0021046891	0.006255511	-0.00056463096	-2.727694	0.01848069	0.51	10.0	2927.066668987274
835	-2.722767	1.4529774	-1.2762517	-6.0289407	50.0	-0.3682862	0.7567242	0.008688636	-5.3034973	3344000	-6.103516e-08	0.0018106411	0.015067786	-0.0004587305	-2.7281992	0.027479135	0.56575	1.0	2930.0456075668335
836	-2.878118	1.3306272	-1.1763824	-5.9785113	50.0	-0.38119557	0.76482326	0.005353814	-5.2652235	3348000	1.411438e-07	0.0015987153	0.01988712	-0.00013411278	-2.7282305	0.044117846	0.69725	1.0	2933.0346183776855
837	-2.722668	1.1950793	-1.1483241	-5.6455107	50.0	-0.36025023	0.7127291	0.0013190936	-4.9612994	3352000	1.9073487e-09	0.0015668253	0.02242102	-0.0002024885	-2.728288	0.032778177	0.6845	1.0	2935.993914604187
838	-2.6668143	1.2669322	-1.1710544	-5.582245	50.0	-0.35628667	0.71733606	0.001828365	-4.9410596	3356000	-1.9073486e-08	0.001517664	0.018387018	-0.0001759493	-2.7283497	0.04865607	0.6965	1.0	2938.8495066165924
839	-2.98466	1.5099475	-1.1732106	-6.269467	50.0	-0.40437195	0.80815095	0.007746175	-5.301436	3360000	-6.484986e-08	0.0029883003	0.015100684	-0.0009077373	-2.7284186	0.03516434	0.5655	1.0	2943.2439482212067
840	-2.971046	1.370924	-1.3483006	-6.0891104	50.0	-0.40759236	0.7927634	0.009898905	-5.3597107	3364000	1.04904174e-07	0.001782759	0.010119699	-0.00020614988	-2.7284784	0.023296067	0.53175	1.0	2946.5754492282867
841	-2.8607574	1.4505769	-1.1305336	-5.877832	50.0	-0.38983113	0.78327554	0.0061163064	-5.3034368	3368000	3.8146972e-08	0.0022570589	0.011485389	-0.0007215553	-2.7285576	0.020791125	0.5675	1.0	2952.69748210907
842	-2.79963	1.3530749	-1.1482013	-5.9078746	50.0	-0.3805245	0.7566431	0.0013160445	-5.188549	3372000	-1.0681153e-07	0.001504638	0.015031766	-0.000109424815	-2.7286463	0.032078277	0.676	1.0	2955.815101623535
843	-3.0033717	1.6101155	-1.1907055	-5.956828	50.0	-0.40193394	0.83050483	0.012438435	-5.235829	3376000	8.964538e-08	0.0019488521	0.024344988	-0.00019942934	-2.7287207	0.03802807	0.69025	1.0	2958.8864681720734
844	-3.027116	1.4947627	-1.2019722	-5.992101	50.0	-0.41496357	0.8193992	2.2759661e-05	-5.27276	3380000	-5.7220458e-08	0.0028098947	0.023425583	-0.00080299866	-2.7288043	0.030276231	0.5865	1.0	2961.8630032539368
845	-2.7784674	1.4087042	-1.1996741	-6.1060424	50.0	-0.37887478	0.73062885	0.010264201	-5.2434316	3384000	1.2207032e-07	0.0050479537	0.017854502	-0.002151118	-2.7289128	0.027794128	0.5095	1.0	2964.859596967697
846	-2.9170105	1.4037219	-1.1906217	-6.190382	50.0	-0.41215724	0.7771356	0.015076738	-5.2341585	3388000	2.4795533e-08	0.0042568445	0.044371195	-0.0011105584	-2.7290125	0.09684643	0.6825	1.0	2968.325408220291
847	-2.7240205	1.3229315	-1.1610982	-5.9832425	50.0	-0.36795974	0.7501113	0.046818886	-5.2982554	3392000	-9.536744e-10	0.0029803612	0.05585941	-0.0016019663	-2.7290986	0.080481574	0.64025	1.0	2971.1715619564056
848	-2.6998444	1.347383	-1.2745326	-6.0184255	50.0	-0.3601676	0.72962373	0.003891956	-5.2614655	3396000	-2.2315979e-07	0.0015377903	0.03496686	-0.00019268692	-2.7292073	0.06033794	0.668	1.0	2974.0751762390137
849	-2.8649817	1.3579274	-1.2041554	-6.0755777	50.0	-0.38060284	0.76575714	0.006123876	-5.3201733	3400000	1.5258789e-07	0.0017402088	0.030484105	-0.00025312928	-2.7293093	0.043853723	0.61275	1.0	2977.037006378174
850	-2.7356956	1.4535185	-1.1673663	-6.0558567	50.0	-0.36913037	0.7569143	0.005557619	-5.3241916	3404000	9.1552735e-08	0.0020633684	0.01518778	-0.0005390595	-2.72942	0.030509166	0.50875	1.0	2980.0175008773804
851	-2.8356447	1.3396853	-1.1900494	-6.0856614	50.0	-0.38736036	0.7606316	0.007139437	-5.34143	3408000	-1.8310547e-07	0.00178901	0.017383864	-0.00019932108	-2.7295234	0.03255399	0.59	1.0	2983.0277667045593
852	-2.7031293	1.3470639	-1.1677974	-6.0517564	50.0	-0.3741355	0.73691446	0.0078233015	-5.358106	3412000	1.2207032e-07	0.0017073494	0.030165909	-0.00019880547	-2.729624	0.05178108	0.6755	1.0	2986.0767829418182
853	-3.155871	1.5754148	-1.2651824	-6.0412283	50.0	-0.42269424	0.8508114	0.01434405	-5.3090243	3416000	-2.0980835e-08	0.0025101646	0.03605532	-0.00060025044	-2.7297294	0.05662347	0.70125	1.0	2989.576253890991
854	-2.5957024	1.1728791	-1.25306	-6.0311246	50.0	-0.3470915	0.67706305	0.0025890246	-5.309062	3420000	4.5776368e-08	0.0031503313	0.03168732	-0.0014176001	-2.7298474	0.046975948	0.66775	1.0	2992.605681657791
855	-2.729218	1.3368545	-1.2363203	-6.0099587	50.0	-0.37113327	0.7293321	0.0056506805	-5.2895384	3424000	5.722046e-09	0.0020956506	0.024589999	-0.00058408524	-2.72996	0.053535946	0.6845	1.0	2995.6923649311066
856	-3.1828995	1.4263434	-1.1990048	-5.8792086	50.0	-0.4305402	0.8385848	0.011352275	-5.198007	3428000	-1.0681153e-07	0.0021494844	0.028874114	-0.00030841294	-2.7300632	0.0456996	0.71725	1.0	2998.7173771858215
857	-2.7381384	1.4530449	-1.215484	-6.003127	50.0	-0.3767298	0.75441766	0.015181802	-5.3044715	3432000	-3.33786e-08	0.0025801016	0.043210372	-0.0010082462	-2.73017	0.092524804	0.78025	1.0	3001.7489845752716
858	-2.8375804	1.3351357	-1.270285	-6.039518	50.0	-0.38102612	0.7592951	0.005641112	-5.2921677	3436000	1.1920929e-07	0.0026971542	0.045500934	-0.00097617565	-2.730253	0.050296444	0.7265	1.0	3004.92494058609
859	-2.8057911	1.2501198	-1.2032642	-6.0167193	50.0	-0.3788529	0.73156416	0.012910208	-5.2944636	3440000	1.8310547e-07	0.0027103387	0.03351014	-0.0010315526	-2.730333	0.039389357	0.671	1.0	3007.9251956939697
860	-3.0846756	1.2238827	-1.1740528	-6.092633	50.0	-0.43114504	0.7907477	0.008895794	-5.3317256	3444000	2.6702882e-08	0.0033781978	0.009773447	-0.0008296503	-2.7304056	0.019880079	0.43225	1.0	3014.778993368149
861	-2.8550153	1.3282881	-1.2849334	-6.1005754	50.0	-0.41034535	0.7610026	0.009593546	-5.351867	3448000	7.05719e-08	0.002788399	0.023662588	-0.0007425945	-2.7304795	0.035418857	0.627	1.0	3019.2216789722443
862	-3.187021	1.5073118	-1.1706249	-6.0443716	50.0	-0.44410777	0.86663663	0.027662117	-5.3416524	3452000	5.3405763e-08	0.0021467207	0.016623775	-0.00041825452	-2.73056	0.03398313	0.60375	1.0	3022.0827486515045
863	-2.703587	1.254403	-1.2048593	-6.102233	50.0	-0.3665824	0.72124547	0.03249751	-5.157341	3456000	-7.2479246e-08	0.0023717317	0.0211101	-0.00090637454	-2.7306542	0.021734724	0.5785	1.0	3025.072518348694
864	-2.8003693	1.4069178	-1.2127466	-6.178304	50.0	-0.38760146	0.7757679	0.008489979	-5.4511356	3460000	-1.0871887e-07	0.0024018874	0.035573892	-0.0008044436	-2.7307465	0.043030683	0.648	1.0	3027.970447063446
865	-2.7073479	1.3668222	-1.2821324	-5.975047	50.0	-0.37311798	0.74941933	0.008253036	-5.2997675	3464000	-4.1007997e-08	0.0017611034	0.020766165	-0.00047746964	-2.7308383	0.035245292	0.566	1.0	3031.466441631317
866	-2.5707731	1.3262198	-1.2167563	-5.8184047	50.0	-0.3416302	0.7030415	0.008355394	-5.1570725	3468000	-8.392334e-08	0.0013531097	0.014918161	-0.00011532882	-2.7309353	0.03964929	0.655	1.0	3034.365185022354
867	-2.935253	1.4264656	-1.1939101	-6.050787	50.0	-0.39555076	0.79276395	0.0029205922	-5.1989775	3472000	1.6021728e-07	0.0017796024	0.012219305	-0.0002183282	-2.73102	0.01949886	0.52925	1.0	3037.286381483078
868	-2.924122	1.4339561	-1.163012	-5.758491	50.0	-0.39803493	0.7949343	0.009089375	-5.0825353	3476000	2.2315979e-07	0.0016702521	0.0057600173	-0.00017643452	-2.73111	0.020703487	0.40725	1.0	3040.1706335544586
869	-3.0239604	1.345595	-1.172237	-5.9935775	50.0	-0.39851257	0.7927224	0.0073591694	-5.3350816	3480000	-2.2888184e-08	0.0019196678	0.003388445	-0.00024954695	-2.7312047	0.03090148	0.52375	1.0	3043.0575120449066
870	-3.0401337	1.3947539	-1.1357924	-6.022237	50.0	-0.4018972	0.80351704	0.010720452	-5.2734566	3484000	2.193451e-07	0.0017553946	0.0010099927	-0.00013097329	-2.7313118	0.016675439	0.35475	4.0	3046.0394275188446
871	-2.8885067	1.2799047	-1.1938753	-6.054528	50.0	-0.38393685	0.7630151	0.004129315	-5.3166094	3488000	-6.5803526e-08	0.0014928866	0.0042100153	-0.000107286614	-2.7316198	0.016191544	0.42125	2.0	3048.732939720154
872	-3.0919688	1.4367057	-1.222544	-6.0637584	50.0	-0.41300872	0.82581	0.0035689045	-5.406703	3492000	1.487732e-07	0.001834425	0.0014075756	-0.0001839085	-2.7317193	0.017670015	0.445	1.0	3051.241844892502
873	-2.77453	1.3134801	-1.1716146	-5.90694	50.0	-0.36206794	0.7370883	0.0018458683	-5.2003903	3496000	1.2207032e-07	0.0015254264	-0.005113075	-0.00014001701	-2.7317634	0.0065101376	0.25175	79.0	3054.8055958747864
874	-2.6333852	0.9965918	-1.2005861	-5.7821517	50.0	-0.33957008	0.66821486	0.0021982659	-5.126758	3500000	8.583069e-08	0.0013689472	0.005129164	-0.0001530851	-2.737986	0.015690813	0.49625	1.0	3057.5002431869507
875	-3.0114155	1.4559757	-1.1878947	-6.0074077	50.0	-0.40246958	0.80851054	0.0037358701	-5.2927794	3504000	-9.727478e-08	0.0019040164	0.003717579	-0.00024382526	-2.7380655	0.016386854	0.396	4.0	3060.560929775238
876	-2.644343	1.3276322	-1.1902515	-5.7453313	50.0	-0.35050157	0.71633875	0.0034195818	-5.0837827	3508000	3.051758e-08	0.0015250883	0.0009822045	-0.00025415048	-2.7384233	0.017202072	0.508	41.0	3063.996962070465
877	-2.8047585	1.2288858	-1.1559623	-5.899844	50.0	-0.37074873	0.7339955	0.0006793551	-5.1846375	3512000	-2.6702882e-08	0.0016427648	0.010457539	-0.00021389057	-2.742551	0.032272324	0.63625	1.0	3067.090667247772
878	-3.0868824	1.4874073	-1.1890501	-6.053725	50.0	-0.41706532	0.8302047	0.0028830022	-5.2540717	3516000	-2.8610229e-08	0.0019041522	0.011192214	-0.00015457126	-2.742623	0.018139632	0.581	1.0	3070.3944351673126
879	-2.7289646	1.4310925	-1.2298981	-6.027093	50.0	-0.36376485	0.7478895	0.00030903518	-5.316427	3520000	2.4795533e-08	0.001831916	0.007824922	-0.00032125902	-2.7426972	0.015703095	0.42525	1.0	3073.6734879016876
880	-2.8231878	1.3703966	-1.1943729	-6.0083585	50.0	-0.3718077	0.75304097	0.0040863473	-5.261663	3524000	-3.4332274e-08	0.0018178562	0.00496559	-0.00021303736	-2.742767	0.016008995	0.43725	3.0	3076.757041454315
881	-3.06323	1.4712154	-1.1608182	-6.0120435	50.0	-0.40849736	0.8204857	0.004267931	-5.273813	3528000	-6.484986e-08	0.0020464493	0.0070569934	-0.00025904668	-2.742931	0.035870206	0.427	1.0	3079.8728363513947
882	-2.9665387	1.4087391	-1.2311285	-5.9856405	50.0	-0.3949536	0.78831905	0.0037644822	-5.127692	3532000	-7.6293944e-08	0.0025816974	0.014976866	-0.00062991783	-2.7429922	0.0300023	0.43975	4.0	3082.9705328941345
883	-2.8389845	1.1596062	-1.1695306	-5.9700446	50.0	-0.37634185	0.7326271	0.008551631	-5.2791567	3536000	6.2942505e-08	0.001962431	0.014550173	-0.0005795632	-2.7432349	0.028498443	0.54625	1.0	3085.8959867954254
884	-2.730517	1.3084754	-1.1659919	-5.9374485	50.0	-0.36575627	0.7359559	0.0021763016	-5.267454	3540000	0.0	0.0017670704	0.0111724315	-0.00033199205	-2.743298	0.020182347	0.43125	2.0	3088.901419878006
885	-2.7900643	1.2799459	-1.1528257	-6.054925	50.0	-0.37019005	0.73295665	0.006451579	-5.280303	3544000	6.9618224e-08	0.0024784284	0.0156045845	-0.0006967917	-2.743457	0.024487838	0.5085	1.0	3091.841871738434
886	-2.5795093	1.2327302	-1.2203615	-5.9951086	50.0	-0.3513986	0.70154566	0.023881296	-5.269552	3548000	2.4795533e-08	0.002006441	0.026592653	-0.0004973124	-2.7435222	0.03968959	0.508	1.0	3094.89199590683
887	-2.8165526	1.3571287	-1.1658624	-6.0095215	50.0	-0.38064015	0.756887	0.004691547	-5.2977414	3552000	2.3841858e-07	0.0023941037	0.03389222	-0.0005995297	-2.743604	0.05129914	0.7175	1.0	3099.9254384040833
888	-2.9287865	1.3965011	-1.2866708	-5.9852424	50.0	-0.40023538	0.79079247	0.009561112	-5.2476068	3556000	-1.9645691e-07	0.002247522	0.033669807	-0.00057596015	-2.7436864	0.056305822	0.70825	1.0	3104.0575366020203
889	-2.7999654	1.1907039	-1.2529352	-5.9545684	50.0	-0.37667444	0.7317875	0.0022865664	-5.2468333	3560000	1.525879e-08	0.0017934475	0.017891714	-0.00038881565	-2.7437723	0.030463198	0.62575	1.0	3107.1031839847565
890	-2.6286693	1.2688301	-1.2179469	-5.953735	50.0	-0.3527945	0.70366096	0.0036747009	-5.226995	3564000	-2.8610229e-08	0.001441306	0.011339675	-0.00017482601	-2.7438462	0.025209898	0.523	1.0	3109.9889929294586
891	-2.6687336	1.263067	-1.1607908	-5.960822	50.0	-0.35324702	0.7147161	0.0017506033	-5.2981777	3568000	-1.7356872e-07	0.001680571	0.0016553593	-0.0003219198	-2.7439158	0.021562133	0.492	3.0	3112.937893629074
892	-2.7932544	1.1709466	-1.2328146	-5.6871996	50.0	-0.3764393	0.728874	0.0075324792	-4.971039	3572000	-2.193451e-07	0.0015916143	0.012237985	-0.00020642357	-2.7440922	0.04372881	0.60675	1.0	3115.915609359741
893	-2.8252835	1.3771957	-1.1407037	-6.0041227	50.0	-0.37566823	0.7612003	0.03572513	-5.3219514	3576000	2.6702882e-08	0.0016635148	0.011441482	-0.0002704797	-2.744153	0.02618377	0.527	1.0	3119.4556245803833
894	-2.7056146	1.4167887	-1.1702803	-5.8114176	50.0	-0.36437213	0.74601763	-0.00019147247	-5.1495037	3580000	-6.103516e-08	0.0014261258	0.010648112	-0.000111986534	-2.7442207	0.027791847	0.61375	1.0	3122.422912120819
895	-2.9781032	1.2816416	-1.2189491	-5.8984303	50.0	-0.39524823	0.77948874	0.002136901	-5.1850038	3584000	5.722046e-09	0.0018004907	0.011921526	-0.00023244496	-2.7442706	0.019861858	0.50825	1.0	3125.38871717453
896	-2.8297431	1.4239315	-1.2380899	-5.997722	50.0	-0.3743918	0.76919484	0.006818237	-5.2813497	3588000	4.5776368e-08	0.0016569638	0.010212176	-0.00015151908	-2.7443213	0.026945194	0.553	1.0	3128.3854508399963
897	-2.8450615	1.3605158	-1.1854848	-5.9907575	50.0	-0.37570918	0.7582422	-0.0010799989	-5.244141	3592000	-5.6266785e-08	0.0023484705	0.015737118	-0.00039073057	-2.7443752	0.021468552	0.5	1.0	3131.456406354904
898	-2.9782557	1.4733882	-1.2174435	-6.0194407	50.0	-0.4003076	0.7973571	0.003358787	-5.3033037	3596000	-4.7683715e-09	0.0036503484	0.019120237	-0.0016833134	-2.744427	0.042582583	0.54375	1.0	3134.5016922950745
899	-2.7101505	1.2836908	-1.2904798	-6.011627	50.0	-0.3748414	0.73966455	0.018544218	-5.2758226	3600000	-1.14440915e-07	0.0040868875	0.029710548	-0.0026952825	-2.7445006	0.028760636	0.53725	1.0	3138.6863989830017
900	-2.6347897	1.2943283	-1.159468	-5.86892	50.0	-0.34693015	0.7096957	0.0033394732	-5.177826	3604000	-8.964538e-08	0.0013524265	0.011219507	-0.00012790866	-2.7445765	0.023854433	0.5485	1.0	3141.652193069458
901	-2.7873769	1.3538316	-1.1712306	-5.7189293	50.0	-0.37145233	0.75145125	0.00195878	-5.060842	3608000	-3.242493e-08	0.0015273493	0.009612813	-0.00017483835	-2.744649	0.018331354	0.53075	1.0	3144.5715963840485
902	-2.7912774	1.2141277	-1.2086576	-6.0453863	50.0	-0.36877826	0.72602934	0.0057446174	-5.2620363	3612000	-4.7683717e-08	0.0016257542	0.008394136	-0.00017721427	-2.7447188	0.0193983	0.525	1.0	3147.880076646805
903	-2.7724385	1.3241123	-1.1440911	-5.8696547	50.0	-0.3715924	0.7424989	0.0019013919	-5.189378	3616000	-3.6239623e-08	0.0018971395	0.00073844724	-0.00036197866	-2.7447827	0.015132436	0.3875	6.0	3150.9528608322144
904	-2.9126196	1.3148328	-1.169084	-5.840426	50.0	-0.3934398	0.7725327	0.005978061	-5.150194	3620000	-9.536743e-09	0.0015666168	0.012168024	-0.00013832538	-2.7453094	0.021575531	0.59275	1.0	3153.948052406311
905	-2.8966393	1.4119694	-1.2090424	-5.772392	50.0	-0.39148253	0.7859549	0.0009942017	-5.1081314	3624000	5.7220458e-08	0.0016309422	0.017825298	-0.00013565645	-2.7454004	0.02950975	0.636	1.0	3160.011565923691
906	-2.7779646	1.2385402	-1.246243	-5.864173	50.0	-0.3663492	0.7309842	5.399622e-05	-5.1723485	3628000	-2.6702882e-08	0.0026837888	0.021001128	-0.0010637399	-2.7454839	0.030478163	0.577	1.0	3165.504743337631
907	-2.816762	1.447079	-1.1678116	-5.9827647	50.0	-0.38064325	0.7745562	0.020103477	-5.2664266	3632000	1.0681153e-07	0.0020753813	0.012971924	-0.00055772194	-2.7455747	0.021937568	0.48325	1.0	3172.343223810196
908	-2.8872979	1.4077708	-1.1825175	-5.9623485	50.0	-0.38188618	0.77881444	0.0065002646	-5.239948	3636000	-2.040863e-07	0.0015872297	0.0051989076	-0.00010064617	-2.7456489	0.016155506	0.4275	3.0	3175.544417142868
909	-3.2395504	1.4240633	-1.236983	-6.017468	50.0	-0.44092053	0.8591682	0.001999747	-5.353379	3640000	1.2588501e-07	0.0018791715	0.0037008934	-0.00012809958	-2.745878	0.021456059	0.47125	1.0	3180.547611951828
910	-2.6603026	1.305734	-1.1651634	-5.9289327	50.0	-0.3560859	0.7224492	0.00064525194	-5.249496	3644000	1.5830993e-07	0.0013312532	0.0019989472	-8.609076e-05	-2.7459238	0.015730806	0.493	5.0	3184.713146209717
911	-2.8592155	1.2259521	-1.161483	-6.1262784	50.0	-0.3761581	0.74570066	0.0022416413	-5.286917	3648000	-1.6307831e-07	0.001840836	0.0029344815	-0.00024565693	-2.7462637	0.017604034	0.37775	30.0	3188.5667719841003
912	-2.9220562	1.4254901	-1.272972	-6.022652	50.0	-0.3909442	0.79370815	0.007591732	-5.3547993	3652000	-2.8610229e-08	0.0016708458	0.011949234	-0.00020271179	-2.7457798	0.016826766	0.492	1.0	3191.414169549942
913	-2.7183585	1.3567845	-1.1736872	-6.0229573	50.0	-0.35876775	0.73725134	0.00093721226	-5.302892	3656000	-7.43866e-08	0.001429792	0.0050606155	-0.00010762329	-2.745731	0.02383694	0.39625	1.0	3194.444982767105
914	-2.6479003	1.2043625	-1.1564374	-5.6546865	50.0	-0.35003617	0.7041045	0.0018655136	-5.0050635	3660000	5.1498414e-08	0.0013860468	0.008149545	-0.0001620648	-2.7456968	0.031609975	0.60975	1.0	3197.520278930664
915	-2.8171678	1.3561258	-1.1931887	-5.9980645	50.0	-0.3715493	0.75372076	0.005346043	-5.294807	3664000	-2.8610229e-08	0.0016498747	0.019007737	-0.0001608996	-2.74566	0.04332451	0.69225	1.0	3200.6413881778717
916	-2.3994632	1.2190537	-1.1557417	-5.9598746	50.0	-0.32221845	0.6561653	0.0073783696	-5.2399664	3668000	1.1062622e-07	0.0011456746	0.024731377	-0.00014547957	-2.7456377	0.043117505	0.70025	1.0	3203.6889357566833
917	-3.0929894	1.4832382	-1.1680583	-5.68198	50.0	-0.40990576	0.8198128	0.0026145075	-5.0163255	3672000	1.6021728e-07	0.0024040388	0.009375061	-0.00042780326	-2.7456386	0.025548644	0.59225	2.0	3206.6463108062744
918	-2.8329804	1.5031602	-1.1808302	-5.826102	50.0	-0.3773592	0.7792757	0.0052687842	-5.138774	3676000	4.7683717e-08	0.0021753341	0.023801083	-0.00047370885	-2.7456934	0.04136295	0.73925	1.0	3209.6405787467957
919	-2.899827	1.4738866	-1.2098632	-5.9673796	50.0	-0.3904582	0.7949979	0.0031197723	-5.2330046	3680000	-1.14440915e-07	0.0017763205	0.022219779	-0.00036147633	-2.7457275	0.028102223	0.67125	1.0	3212.5900440216064
920	-2.7110155	1.2692366	-1.1854209	-5.964293	50.0	-0.35825676	0.71818763	0.0012901798	-5.251606	3684000	7.2479246e-08	0.0016721969	0.022041202	-0.0002933098	-2.745776	0.04335147	0.6765	1.0	3215.5275592803955
921	-2.727208	1.2740412	-1.1822988	-5.8636837	50.0	-0.36318168	0.7247694	0.0029737186	-5.1624975	3688000	8.964538e-08	0.0022534023	0.015315268	-0.0004668045	-2.7458293	0.018356577	0.52	1.0	3218.488668680191
922	-2.852483	1.3215106	-1.2247925	-5.962679	50.0	-0.39222696	0.7590311	0.007841362	-5.2821407	3692000	-3.33786e-08	0.0028888276	0.0123652015	-0.00067560934	-2.745888	0.024786726	0.5335	3.0	3221.4745967388153
923	-2.5598192	1.2730272	-1.1596605	-6.019911	50.0	-0.35007685	0.6958283	0.025326459	-5.260281	3696000	7.152558e-08	0.0025511757	0.029433627	-0.0009169795	-2.746055	0.037997615	0.65025	1.0	3224.346675634384
924	-2.9458897	1.4091012	-1.1738203	-5.974091	50.0	-0.39612958	0.7933946	0.041312486	-5.315598	3700000	-7.2479246e-08	0.0027635598	0.032908686	-0.0005947747	-2.74613	0.08070576	0.71975	1.0	3227.1562936306
925	-2.974383	1.3871709	-1.3151957	-5.99466	50.0	-0.399211	0.800275	0.020796034	-5.288871	3704000	6.67572e-08	0.0020455811	0.0379988	-0.00050629186	-2.7461953	0.081930555	0.74625	1.0	3229.8118288517
926	-2.9866722	1.4487102	-1.2010007	-5.9446	50.0	-0.40653387	0.81397855	0.0047183204	-5.233277	3708000	2.0980835e-08	0.0016550275	0.030183388	-0.00018102687	-2.7462556	0.059312385	0.70175	1.0	3232.6844482421875
927	-2.9420888	1.5443558	-1.1702728	-6.090586	50.0	-0.40265474	0.81236064	0.0071340986	-5.243147	3712000	-5.3405763e-08	0.0025039972	0.02126646	-0.00077874213	-2.746335	0.027785905	0.61025	1.0	3235.531712770462
928	-2.8659172	1.4264702	-1.1627443	-6.00806	50.0	-0.39585868	0.77699816	0.0014651027	-5.3355126	3716000	-3.9100648e-08	0.0025410794	0.023056645	-0.0008765615	-2.7463994	0.040858664	0.53975	2.0	3238.4611859321594
929	-2.6502728	1.2316569	-1.1687815	-5.949299	50.0	-0.36047742	0.71157044	0.017339794	-5.233827	3720000	1.0871887e-07	0.001692457	0.022493426	-0.00033522898	-2.7465706	0.045235336	0.61675	1.0	3241.3038709163666
930	-3.144488	1.3809645	-1.214388	-6.066866	50.0	-0.4319332	0.82903504	0.0051505566	-5.3005977	3724000	1.3160705e-07	0.0024078607	0.017218981	-0.00061088824	-2.7466683	0.04743622	0.525	1.0	3244.2299094200134
931	-2.87897	1.4119807	-1.1476848	-6.02044	50.0	-0.39071843	0.7850547	0.011062013	-5.2909226	3728000	-1.7166138e-07	0.0017770506	0.021914437	-0.000313645	-2.7467482	0.05673203	0.63975	1.0	3247.225296020508
932	-2.7755637	1.4967281	-1.2419195	-5.908903	50.0	-0.37646496	0.77687556	0.005302379	-5.197726	3732000	1.9073487e-09	0.001560238	0.025614645	-0.0002151546	-2.7468457	0.052715912	0.652	1.0	3250.5293979644775
933	-2.628989	1.3397918	-1.2425106	-5.806875	50.0	-0.35093367	0.7180061	0.0013700351	-5.1339803	3736000	-5.722046e-09	0.0015014599	0.020476427	-0.00020708016	-2.7469099	0.05772525	0.609	1.0	3253.415287256241
934	-2.828731	1.2056233	-1.304215	-6.009862	50.0	-0.37318146	0.73810315	0.004323408	-5.3061466	3740000	0.0	0.0016533748	0.015032767	-0.00024007447	-2.7469904	0.03277837	0.42125	1.0	3256.3116557598114
935	-2.9019659	1.4251773	-1.214072	-6.0757856	50.0	-0.3880343	0.76914614	0.0020646993	-5.252115	3744000	-4.005432e-08	0.003738147	0.021099102	-0.0017456885	-2.7470908	0.030763539	0.48925	1.0	3259.3191623687744
936	-2.6469264	1.2302315	-1.2110745	-5.943005	50.0	-0.35728475	0.7076426	0.003518859	-5.3021474	3748000	1.6021728e-07	0.0028846064	0.02259609	-0.0012699752	-2.7471812	0.029751223	0.49925	1.0	3262.1899132728577
937	-2.9256475	1.2948232	-1.3011445	-5.8875985	50.0	-0.39428046	0.7705556	0.003030656	-5.2365727	3752000	-2.0980835e-08	0.00252906	0.022676094	-0.0007561126	-2.7472782	0.03901429	0.46125	1.0	3265.1470153331757
938	-2.8993564	1.2196058	-1.1876905	-5.9321384	50.0	-0.38647768	0.75987005	0.0032580625	-5.230525	3756000	8.010864e-08	0.0016219164	0.012490608	-0.00019967346	-2.7473564	0.028560342	0.44025	1.0	3268.00802898407
939	-2.8526025	1.4619931	-1.277057	-6.0393414	50.0	-0.38187996	0.7790817	0.0029288866	-5.216967	3760000	-2.0980835e-08	0.0015922223	0.009226254	-0.00012092956	-2.7474413	0.019642787	0.3615	1.0	3270.9379267692566
940	-2.6529505	1.3323996	-1.2108654	-5.8579106	50.0	-0.35645312	0.7176002	0.0027503036	-5.1557426	3764000	-2.6702882e-08	0.0014382481	-0.0036603946	-0.00013046444	-2.7475197	0.002076778	0.18475	79.0	3274.5656356811523
941	-2.7715886	1.4266587	-1.1825379	-5.919533	50.0	-0.37170324	0.76119107	0.0006595813	-5.1849484	3768000	1.4686584e-07	0.0015596151	0.0061434996	-0.00015948177	-2.7532668	0.017258326	0.49525	1.0	3277.5520253181458
942	-2.9733694	1.3721445	-1.1768092	-6.02467	50.0	-0.40071175	0.79487294	-0.00025298633	-5.2790847	3772000	5.1498414e-08	0.0016995738	0.01270971	-0.00022257469	-2.7533376	0.03975906	0.61375	1.0	3280.568995475769
943	-2.8722486	1.381442	-1.138567	-5.976146	50.0	-0.38469774	0.77482265	0.00039279647	-5.2721443	3776000	-1.7166137e-08	0.0017647312	0.0116020655	-0.00022454571	-2.7534077	0.034591556	0.51975	1.0	3283.494518995285
944	-2.9271178	1.5345697	-1.2015516	-5.8915906	50.0	-0.3945948	0.8036512	-0.00037185103	-5.1869106	3780000	5.722046e-09	0.0024174282	0.01164655	-0.0005464199	-2.7534742	0.023602748	0.4935	1.0	3286.4694271087646
945	-2.9335837	1.3006074	-1.2834575	-6.0927057	50.0	-0.39508134	0.7709868	0.0020315815	-5.264524	3784000	1.0490417e-08	0.0018687753	0.015014987	-0.00024677103	-2.7535167	0.029001486	0.571	1.0	3289.478919029236
946	-3.0450025	1.3942393	-1.1909454	-6.015403	50.0	-0.41161367	0.81095415	0.0038512535	-5.212795	3788000	-1.7547607e-07	0.002619744	0.03773925	-0.00072833756	-2.753559	0.05965898	0.72475	1.0	3292.418345928192
947	-2.8342109	1.3860494	-1.1688632	-5.828335	50.0	-0.37545013	0.76590055	0.008393405	-5.4428916	3792000	5.7220458e-08	0.0019080334	0.022651367	-0.00047703285	-2.7535987	0.053328954	0.75075	1.0	3295.2644226551056
948	-2.7676055	1.3437253	-1.2301055	-5.9720216	50.0	-0.37252173	0.7473584	0.0004803557	-5.297792	3796000	6.103516e-08	0.0014566489	0.019933606	-9.5333206e-05	-2.753631	0.042643458	0.69625	1.0	3298.107880115509
949	-2.8872607	1.4496162	-1.1887527	-5.9683857	50.0	-0.38439935	0.784188	-0.0015880521	-5.2366967	3800000	1.525879e-08	0.0018861282	0.017764745	-0.00034972036	-2.753672	0.022954889	0.55425	1.0	3300.950250148773
950	-2.7016532	1.4227388	-1.168939	-6.0185103	50.0	-0.36847943	0.74642956	-0.000616245	-5.281525	3804000	-1.0299683e-07	0.0020677133	0.01532259	-0.00042678067	-2.753712	0.026505224	0.5925	16.0	3303.9902946949005
951	-2.9890125	1.5563921	-1.1545943	-6.0216064	50.0	-0.4043084	0.8288039	0.027771365	-5.2709866	3808000	-1.1634827e-07	0.0017926825	0.017894113	-0.00017215044	-2.7539542	0.02693481	0.594	1.0	3306.8725686073303
952	-2.9259975	1.5131409	-1.2200391	-6.0862904	50.0	-0.3952319	0.7990177	0.0021102447	-5.270184	3812000	-3.6239623e-08	0.002270239	0.013054676	-0.00037722336	-2.7539396	0.023421947	0.58225	1.0	3309.9775536060333
953	-2.7679112	1.3758621	-1.2940494	-5.8647714	50.0	-0.36921576	0.754189	0.010745658	-5.2181907	3816000	-2.4795533e-08	0.0016409912	0.019297121	-0.00026551017	-2.753958	0.0528021	0.722	1.0	3313.2286908626556
954	-2.7424772	1.3531736	-1.2472589	-6.0163665	50.0	-0.37607867	0.7507881	0.0019371137	-5.223586	3820000	-3.8146974e-09	0.0014334167	0.016477555	-0.0001688496	-2.7539618	0.044227153	0.6565	1.0	3316.2139716148376
955	-2.7406821	1.415778	-1.1487715	-6.14794	50.0	-0.36293733	0.74730605	0.0022852663	-5.2465687	3824000	1.6784668e-07	0.0016878113	0.022080224	-0.00022167526	-2.75398	0.053838648	0.69775	1.0	3319.149068593979
956	-2.671555	1.2462091	-1.1595268	-5.7884526	50.0	-0.3516045	0.7136543	0.0002919268	-5.11245	3828000	-1.3351441e-08	0.001725288	0.024855725	-0.00033461698	-2.754	0.04459978	0.6515	1.0	3321.9297642707825
957	-2.8439727	1.4443011	-1.2795159	-6.0628905	50.0	-0.38304156	0.773994	0.020087069	-5.346176	3832000	-1.8119812e-07	0.0024268047	0.016786134	-0.0005657448	-2.7540152	0.019228615	0.51325	1.0	3324.7707302570343
958	-2.9265294	1.3845595	-1.1573993	-6.092934	50.0	-0.40705195	0.7812833	0.004974302	-5.251792	3836000	2.193451e-08	0.0027656485	0.015210511	-0.0008673837	-2.7540283	0.028787125	0.4505	2.0	3327.6230540275574
959	-2.7517388	1.2222192	-1.237136	-5.710867	50.0	-0.37889105	0.72220737	-0.00020705909	-5.072818	3840000	-3.051758e-08	0.0028809807	0.01717043	-0.0010686524	-2.7540827	0.020494098	0.503	1.0	3330.466737270355
960	-3.0936651	1.5120615	-1.1443677	-6.03505	50.0	-0.43097726	0.8426081	0.026412027	-5.154579	3844000	2.861023e-09	0.0026324613	0.017311733	-0.00053553446	-2.754117	0.032858405	0.60275	1.0	3333.298663377762
961	-2.9567134	1.4062694	-1.2144803	-5.8525844	50.0	-0.4015941	0.8045917	0.009796428	-5.2292595	3848000	1.01089476e-07	0.0020175006	0.022823513	-0.0005573252	-2.7541318	0.03448823	0.6245	1.0	3336.1484336853027
962	-2.9020083	1.3505708	-1.1928482	-6.016064	50.0	-0.38590252	0.77845675	0.0035805292	-5.305478	3852000	-1.4305115e-07	0.0015182219	0.014842557	-0.0001313939	-2.7541485	0.033945534	0.6945	1.0	3339.0033547878265
963	-2.6089633	1.2182388	-1.2077119	-5.8147264	50.0	-0.35138306	0.69945693	0.0002288185	-5.111137	3856000	-1.8692016e-07	0.0013211477	0.018489847	-0.00014399097	-2.7541676	0.039296985	0.69925	1.0	3341.9629254341125
964	-2.7081838	1.238497	-1.16336	-5.861373	50.0	-0.3540539	0.71836567	7.5343996e-05	-5.164734	3860000	1.335144e-07	0.0018951809	0.019356364	-0.00048243348	-2.7541726	0.03121716	0.65625	1.0	3344.9681668281555
965	-2.8992717	1.4050949	-1.2052597	-5.8906713	50.0	-0.38515708	0.7796718	-0.0011027604	-5.1253943	3864000	-3.8146972e-08	0.0017344092	0.015269396	-0.00021370163	-2.7542028	0.028637517	0.6315	1.0	3348.050930738449
966	-2.807408	1.2607328	-1.2918333	-5.902037	50.0	-0.3785698	0.7450506	0.00027151965	-5.146525	3868000	7.2479246e-08	0.0017942642	0.007320131	-0.00028526701	-2.754231	0.020816239	0.54825	6.0	3351.114025115967
967	-2.7668355	1.3190247	-1.1898298	-5.993793	50.0	-0.37053913	0.74519956	0.0044801533	-5.4709425	3872000	1.1634827e-07	0.0015520522	0.014712032	-0.0002180629	-2.7545226	0.025441177	0.58025	1.0	3354.175180912018
968	-2.904394	1.533939	-1.1930792	-5.960253	50.0	-0.38789147	0.8048081	0.0036534332	-5.2523365	3876000	-3.242493e-08	0.001587773	0.013619404	-9.56445e-05	-2.7545774	0.037793063	0.61625	1.0	3357.1822559833527
969	-2.8848436	1.3389765	-1.2247453	-5.819849	50.0	-0.3873442	0.76965564	0.0037067607	-5.119821	3880000	-4.9591065e-08	0.0021611622	0.011985566	-0.000522085	-2.754638	0.033143945	0.56925	1.0	3360.147115945816
970	-2.6536317	1.3409214	-1.170879	-6.0359755	50.0	-0.3568297	0.72325665	0.005489502	-5.2769628	3884000	-1.0299683e-07	0.0016390738	0.023060923	-0.00026364415	-2.7546914	0.0675075	0.71725	1.0	3363.161291360855
971	-2.692871	1.3773304	-1.1503148	-5.7531137	50.0	-0.35370156	0.7379622	-0.00046559423	-5.1474648	3888000	-4.7683717e-08	0.0015222307	0.022644026	-0.00025392917	-2.7547588	0.0458586	0.665	1.0	3366.154270172119
972	-2.8860087	1.2666131	-1.1730025	-5.965784	50.0	-0.39137432	0.7648032	0.0048316456	-5.264758	3892000	-4.9591065e-08	0.0015583315	0.014375841	-0.0001867779	-2.754812	0.043479245	0.66725	1.0	3369.090162038803
973	-2.8274193	1.3619032	-1.1662927	-6.0399747	50.0	-0.38526124	0.76459795	0.0020748992	-5.300166	3896000	1.9073486e-08	0.0015686679	0.020907525	-0.00010895904	-2.7548544	0.029665947	0.64875	1.0	3372.144944667816
974	-2.7566497	1.3007046	-1.2557307	-5.9155645	50.0	-0.3842112	0.74262255	0.008120498	-5.2292194	3900000	-9.536743e-09	0.0018705528	0.0200586	-0.000370648	-2.754915	0.037885368	0.64225	1.0	3375.096088886261
975	-2.6129413	1.2360781	-1.2036091	-5.7825837	50.0	-0.35088208	0.7003466	0.016830307	-5.0904326	3904000	9.536744e-10	0.002499033	0.01773175	-0.0009305193	-2.7549767	0.029145913	0.5325	1.0	3378.053027868271
976	-2.6859093	1.2244377	-1.1451284	-5.7939754	50.0	-0.3695687	0.7137557	0.015821086	-5.095645	3908000	-1.5449524e-07	0.0017620835	0.015783172	-0.0002755794	-2.7550442	0.048050575	0.6265	1.0	3381.1153044700623
977	-2.6498027	1.3211874	-1.1674742	-5.9348125	50.0	-0.37452415	0.71981096	0.009161996	-5.2692685	3912000	-2.002716e-07	0.002525454	0.027703572	-0.0006918835	-2.7551076	0.046313427	0.66475	1.0	3384.071538925171
978	-2.8920279	1.3143001	-1.1838976	-6.1750746	50.0	-0.40373632	0.75577444	0.009646717	-5.2737494	3916000	2.1362305e-07	0.0041439096	0.039825648	-0.001519083	-2.755179	0.06855116	0.7065	1.0	3387.0358107089996
979	-2.8770988	1.4588077	-1.2013888	-5.9500737	50.0	-0.40420592	0.78869784	0.019974604	-5.3565426	3920000	-8.010864e-08	0.0030715363	0.030408278	-0.0010943904	-2.7552485	0.04033991	0.67	1.0	3389.948804616928
980	-2.8855412	1.3875644	-1.1879123	-5.878039	50.0	-0.39208937	0.78514284	0.0071287397	-5.1982117	3924000	-5.1498414e-08	0.0015678244	0.015760787	-0.00013727101	-2.755321	0.036570676	0.589	1.0	3392.8106532096863
981	-2.9536483	1.6195877	-1.1488752	-5.999204	50.0	-0.40127116	0.8229734	0.0051745884	-5.2508254	3928000	-2.7084351e-07	0.0016926032	0.016431144	-0.00011802628	-2.7553756	0.045018844	0.63175	1.0	3395.692639350891
982	-2.625148	1.3473849	-1.2159503	-5.78765	50.0	-0.35372138	0.7201306	0.0047154203	-5.087532	3932000	-1.1634827e-07	0.0014113656	0.0142620485	-0.00014992361	-2.7554433	0.05153297	0.71125	1.0	3398.5425140857697
983	-3.0224826	1.4513938	-1.2171283	-6.0604506	50.0	-0.40843108	0.818122	0.0060052667	-5.2818975	3936000	1.7738343e-07	0.0018055853	0.015031672	-0.00023188221	-2.7555137	0.033887878	0.62525	1.0	3401.6150810718536
984	-2.7228034	1.2201443	-1.2740391	-5.956735	50.0	-0.36248827	0.7221577	0.0014407169	-5.2654576	3940000	2.4795533e-08	0.0019324465	0.012942462	-0.00061665336	-2.7555766	0.024082242	0.5095	2.0	3404.510896205902
985	-2.9574783	1.353465	-1.2556207	-5.9937816	50.0	-0.39827806	0.79165715	0.0035900772	-5.275773	3944000	1.2016297e-07	0.0021757155	0.0277622	-0.0006103703	-2.7557073	0.046078116	0.68225	1.0	3407.745449781418
986	-2.769839	1.3693128	-1.2162522	-6.081042	50.0	-0.36711642	0.7551762	0.002544308	-5.3268795	3948000	-4.5776368e-08	0.0015301617	0.018864345	-0.00018279988	-2.7557764	0.046143126	0.6755	1.0	3410.686470746994
987	-2.827811	1.2707438	-1.1861445	-5.901879	50.0	-0.37566483	0.74716437	0.0042546783	-5.2153244	3952000	-1.0681153e-07	0.0015135796	0.02393721	-0.00010617811	-2.755837	0.07154924	0.76725	1.0	3413.7715396881104
988	-2.7367206	1.4282125	-1.1998444	-5.938161	50.0	-0.36534736	0.75323975	0.011086369	-5.257035	3956000	-5.9127807e-08	0.0015146114	0.02775006	-0.00014239957	-2.7558982	0.099306464	0.78975	1.0	3416.852775335312
989	-2.785625	1.3285415	-1.1944313	-5.811846	50.0	-0.36950743	0.7436727	0.004322894	-5.105503	3960000	6.2942505e-08	0.0022846928	0.03442134	-0.00068794575	-2.755962	0.06403485	0.703	1.0	3419.9167263507843
990	-2.6198678	1.1682945	-1.1686949	-6.0361795	50.0	-0.34776682	0.6840242	0.003990799	-5.319317	3964000	6.866455e-08	0.0021387525	0.011473817	-0.00061230443	-2.7560382	0.01827749	0.43825	1.0	3422.930698633194
991	-2.982656	1.4332736	-1.2440972	-6.0471487	50.0	-0.4066635	0.80066514	0.0057614427	-5.3190126	3968000	1.1444092e-08	0.0022791268	0.0052069793	-0.00040714163	-2.7561147	0.01997597	0.423	4.0	3425.9447638988495
992	-3.0353835	1.5970727	-1.1543189	-6.00108	50.0	-0.41474918	0.83698356	0.012256568	-5.2922215	3972000	-1.9454956e-07	0.002299091	0.011109543	-0.00033116993	-2.7564003	0.01843951	0.455	3.0	3428.911814928055
993	-2.8668149	1.4979302	-1.1778996	-5.9601336	50.0	-0.3939663	0.7828131	0.010171104	-5.25556	3976000	4.386902e-08	0.0025417719	0.010709311	-0.0008740077	-2.756645	0.020060774	0.51075	1.0	3431.9533002376556
994	-2.8053253	1.4730237	-1.1457913	-6.0138206	50.0	-0.38684282	0.77316296	0.020175751	-5.258573	3980000	5.9127807e-08	0.0022546672	0.007039686	-0.00045092928	-2.756726	0.016052423	0.44825	4.0	3435.0821335315704
995	-2.72575	1.3664345	-1.2558327	-5.9289923	50.0	-0.37519634	0.73847634	0.017156318	-5.2194963	3984000	-7.6293944e-08	0.0025571703	0.020727409	-0.00034842198	-2.75711	0.033514418	0.59475	1.0	3438.08669424057
996	-2.8186631	1.3509897	-1.173906	-6.0090237	50.0	-0.38489264	0.75704736	0.026767123	-5.2853374	3988000	-1.9073486e-08	0.0018149284	0.01825695	-0.00030515552	-2.7572026	0.033375267	0.64	1.0	3441.0831751823425
997	-2.904489	1.3079927	-1.1559646	-5.8612328	50.0	-0.39531037	0.7696014	0.009526096	-5.139086	3992000	-1.9073487e-07	0.0019322379	0.020805951	-0.00047055702	-2.7572982	0.05762727	0.709	1.0	3444.0027434825897
998	-3.1404085	1.4448339	-1.2040027	-6.0906434	50.0	-0.42844188	0.84136724	0.0049247798	-5.2994065	3996000	3.242493e-08	0.0018863135	0.020006502	-0.00018227426	-2.7574058	0.07011328	0.72975	1.0	3446.846845149994
999	-3.0048032	1.4014547	-1.2770816	-5.9965568	50.0	-0.40471485	0.8065965	0.0024314336	-5.286884	4000000	1.7929077e-07	0.0018896975	0.027600037	-0.00029967562	-2.757516	0.08299691	0.741	1.0	3450.2047946453094
1000	-2.597316	1.2259735	-1.1590047	-5.976079	50.0	-0.34718177	0.69205	0.0042218044	-5.1460867	4004000	1.8119812e-07	0.002635289	0.037341293	-0.0010612066	-2.7576118	0.061511226	0.708	1.0	3453.1864972114563
